# Supplementary material for: Using telemedicine to support care for people with type 2 diabetes mellitus: a qualitative analysis of patients’ perspectives
Source: PubMed Central journal article supplement — BMJ Open. 2019 Oct 22;9(10):e026575. doi: 10.1136/bmjopen-2018-026575 (PMC6830613; doi:10.1136/bmjopen-2018-026575), 2019-10-22
Supplement: bmjopen-2018-026575.draft_revisions.pdf [file bmjopen-2018-026575.draft_revisions.pdf]

# BMJ Open

BMJ Open is committed to open peer review. As part of this commitment we make the peer review history of every article we publish publicly available.

When an article is published we post the peer reviewers' comments and the authors' responses online. We also post the versions of the paper that were used during peer review. These are the versions that the peer review comments apply to.

The versions of the paper that follow are the versions that were submitted during the peer review process. They are not the versions of record or the final published versions. They should not be cited or distributed as the published version of this manuscript.

BMJ Open is an open access journal and the full, final, typeset and author-corrected version of record of the manuscript is available on our site with no access controls, subscription charges or pay-per-view fees (<http://bmjopen.bmj.com>).

If you have any questions on BMJ Open's open peer review process please email [info.bmjopen@bmj.com](mailto:info.bmjopen@bmj.com)

# BMJ Open

## Using telemedicine to support care for type 2 diabetes mellitus: A qualitative analysis of patient's perspective

|                               |                                                                                                                                                                                                                                                                                                                                                                                                                                                                                                  |
|-------------------------------|--------------------------------------------------------------------------------------------------------------------------------------------------------------------------------------------------------------------------------------------------------------------------------------------------------------------------------------------------------------------------------------------------------------------------------------------------------------------------------------------------|
| Journal:                      | <i>BMJ Open</i>                                                                                                                                                                                                                                                                                                                                                                                                                                                                                  |
| Manuscript ID                 | bmjopen-2018-026575                                                                                                                                                                                                                                                                                                                                                                                                                                                                              |
| Article Type:                 | Original research                                                                                                                                                                                                                                                                                                                                                                                                                                                                                |
| Date Submitted by the Author: | 10-Sep-2018                                                                                                                                                                                                                                                                                                                                                                                                                                                                                      |
| Complete List of Authors:     | Lee, Jun Yang; Monash University, School of Pharmacy<br>Chan, Carina; La Trobe University College of Science Health and Engineering<br>Chua, Siew Siang; Taylor's University<br>Paraidathathu, Thomas; Taylor's University, School of Pharmacy<br>Lee, Kenneth Kwing-Chin; Monash University Malaysia, School of Pharmacy<br>Tan, Christina; HELP International Corporation Bhd<br>Nasir, Nazrila; Kementerian Kesihatan Malaysia<br>Lee, Shaun Wen Huey ; Monash University, School of Pharmacy |
| Keywords:                     | General diabetes < DIABETES & ENDOCRINOLOGY, QUALITATIVE RESEARCH, Telemedicine < BIOTECHNOLOGY & BIOINFORMATICS                                                                                                                                                                                                                                                                                                                                                                                 |
|                               |                                                                                                                                                                                                                                                                                                                                                                                                                                                                                                  |

SCHOLARONE™  
Manuscripts

1  
2  
3  
4  
5 **Using telemedicine to support care for type 2 diabetes mellitus: A qualitative**  
6 **analysis of patient's perspective**  
7  
8  
9

10  
11 Short running title: Patient's perspective of telemedicine  
12  
13

14  
15 <sup>1</sup>Jun Yang LEE <sup>2,3</sup>Carina Ka Yee CHAN, <sup>4</sup>Siew Siang CHUA, <sup>4</sup>Thomas  
16 PARAIATHATHU, <sup>1</sup>Kenneth Kwee Ching LEE, <sup>5</sup>Christina San San TAN, <sup>6</sup>Nazrila  
17 NASIR, <sup>1,7</sup>Shaun Wen Huey LEE  
18  
19  
20  
21  
22  
23

24 <sup>1</sup>School of Pharmacy, Monash University Malaysia, Jalan Lagoon Selatan, Bandar  
25 Sunway, 47500, Subang Jaya, Selangor, Malaysia.  
26  
27

28 <sup>2</sup> School of Psychology and Public Health, College of Science, Health and  
29 Engineering, La Trobe University, Australia.  
30  
31

32 <sup>3</sup>Jeffrey Cheah School of Medicine and Health Sciences, Monash University  
33 Malaysia, Jalan Lagoon Selatan, Bandar Sunway, 47500, Subang Jaya, Selangor,  
34 Malaysia.  
35  
36  
37

38 <sup>4</sup>School of Pharmacy, Faculty of Health and Medical Sciences, Taylor's University  
39 Malaysia, 47500 Subang Jaya, Selangor, Malaysia.  
40  
41  
42

43 <sup>5</sup>Centre for Pre-University Studies, HELP College of Arts and Technology, Kuala  
44 Lumpur, Malaysia.  
45  
46

47 <sup>6</sup>Klinik Kesihatan Putrajaya, Putrajaya, Malaysia.  
48  
49

50 <sup>7</sup>Asian Centre for Evidence Synthesis in Population, Implementation and Clinical  
51 Outcomes (PICO), Health and Well-being Cluster, Global Asia in the 21st Century  
52 (GA21) Platform, Monash University Malaysia, Bandar Sunway, Selangor Malaysia  
53  
54  
55  
56  
57  
58  
59  
60

1  
2  
3  
4  
5 *Corresponding author and person in who reprint request should be addressed to*

6  
7 Shaun Lee Wen Huey

8  
9 School of Pharmacy

10  
11 Monash University Malaysia

12  
13 Jalan Lagoon Selatan,

14  
15 47500 Bandar Sunway,

16  
17 Selangor Darul Ehsan,

18  
19 Malaysia.

20  
21 Telephone: +60 3 5514 5890

22  
23 Fax: +60 3 5514 6364

24  
25 Email: [shaun.lee@monash.edu](mailto:shaun.lee@monash.edu)

26  
27  
28  
29  
30  
31 Keywords: telemedicine; qualitative; patient perspective; barriers; diabetes

32  
33  
34  
35 Word count: 3,167 words

## Abstract

**Objective:** Telemedicine has been promoted as an economical and effective way to enhance patient care but the acceptability among patients is poorly understood. This study aimed to explore the experiences and perspective of type 2 diabetes mellitus patients who use telemedicine to manage their condition.

**Design:** We conducted an in-depth interviews and focus group with participants who used telemedicine. Questions included participants' perception of program use, satisfaction as well as engagement with program. All interviews and focus groups were audio-recorded and transcribed verbatim. The data were analyzed using a thematic approach.

**Participants and setting:** All type 2 diabetes patients who had participated in a randomized controlled study examining the use of telemedicine for the management of diabetes.

**Results:** Twelve focus groups and two in-depth interview with a total of 48 adults were conducted and four themes emerged from the analysis. (1) The younger generation was more receptive to telemedicine. (2) Using telemedicine was a convenient solution to care for their disease. (3) Sharing of personal health status with family members kept patients accountable for their health. (4) Some participants expressed concerned about their privacy infringement, presence of malware and costs.

**Conclusion:** Despite the potential positive benefits of using telemedicine for diabetes care, several barriers could inhibit the sustained and effective use of this technology. As such, collaboration between educators, health care providers,

1  
2  
3 telecommunication service providers and patients is required to stimulate  
4  
5 telemedicine adoption and use.

### 6 7 **Strengths and limitations of this study**

- 11 • This study focused on the acceptability and perception towards using  
12 technology for the management of type 2 diabetes  
13
- 14 • We captured the views, experiences, as well as barriers and facilitators to  
15 using telemedicine of patients rather than healthcare providers, as these tend  
16 to be frequently overlooked  
17
- 18 • The study was conducted in an urban setting in Malaysia and its applicability  
19 and transferability to other population remains unknown.  
20  
21  
22  
23  
24  
25  
26  
27  
28  
29  
30  
31  
32  
33  
34  
35  
36  
37  
38  
39  
40  
41  
42  
43  
44  
45  
46  
47  
48  
49  
50  
51  
52  
53  
54  
55  
56  
57  
58  
59  
60

## Introduction

Diabetes is a major health concern worldwide, and according to a recent report by the International Diabetes Federation, the global prevalence of diabetes has increased from 415 million in 2015 to 425 million in 2017<sup>1</sup>. The prevalence varies considerably between different regions, but the epicenter of the diabetes crisis is currently located in the Western Pacific and South-East Asia region, with 159 million and 82 million individuals with diabetes respectively. In many individuals with diabetes, self-monitoring of blood glucose (SMBG) is considered a key component of treatment, and widely recommended by clinical practice guidelines irrespective of treatment strategy<sup>2-4</sup>. SMBG is often used as an early warning sign for detecting hypoglycemia, for improving the recognition of severe hyperglycemia, to encourage physical activities as well as improve diet control. These data are also often used by the treating physician to facilitate an individualized treatment regimen.

Despite these potential benefits, there is controversy on the efficacy of SMBG especially in non-insulin dependent type 2 diabetes due to its cost, uncertainty on frequency of testing as well as impact on patients' general health and well-being. Studies of enhanced SMBG which involved engagement of patients and/or clinicians to interpret the SMBG values found that larger HbA1c reduction compared to only regular SMBG which did not involve any active participation from any parties<sup>3-7</sup>.

The application of telemedicine in diabetes management has been suggested as an innovative solution to improve diabetes care<sup>8-10</sup>. Increasingly, telemedicine is being viewed as a promising technology in assisting patients to manage their diabetes<sup>9 11</sup><sup>12</sup>. The use of telemedicine is promising in diabetes management, as it produces

1  
2  
3 accurate and reliable data, empowers patients, improves glycemic control and  
4 influences their attitude and behaviors, potentially leading to a better quality of life<sup>11-</sup>  
5  
6  
7 <sup>13</sup>. Additionally, telemedicine has the potential to reduce the barrier to adherence of  
8  
9 self-management through real-time data transfer between patient and provider, the  
10  
11 review glucose measurement trends, and a reduction opportunity costs. Some  
12  
13 potential telemedicine applications and technologies that have been examined to  
14  
15 date include mobile phones, texting, emails, e-health portals, videoconferencing as  
16  
17 well as devices<sup>14</sup>.  
18  
19  
20  
21

22 However, implementation of a telemedicine service in conventional care is a complex  
23  
24 process. Studies have shown that while telemedicine can expand the boundaries of  
25  
26 care to a larger population, there is heavy resistance to change, especially among  
27  
28 patients<sup>15 16</sup>. Nevertheless, one of the major limitation of existing literature is the lack  
29  
30 of studies which has examined the perspective of patients from a low-middle income  
31  
32 country. Therefore, the goal of this study was to explore patients' views and  
33  
34 experiences of telemedicine for diabetes management in Malaysia.  
35  
36  
37  
38  
39  
40  
41  
42  
43  
44  
45  
46  
47  
48  
49  
50  
51  
52  
53  
54  
55  
56  
57  
58  
59  
60



## Materials and Methods

### Study design

This qualitative study used a purposive sampling to select participants who had been part of a larger multicenter randomized controlled study, Intervention for Diabetes with Education, Advancement and Support (IDEAS) reported elsewhere (Box 1)<sup>17</sup>. Participants were approached for the qualitative study when they agreed to participate in the study, but participation for the in-depth interview was optional. The clinics in the study were drawn from a nationally representative list of clinics in Klang Valley, Malaysia.

### Participants and Procedure

Participants for this qualitative study were patients who received care in one of the eleven clinics which provided diabetes care. Selection criteria for participants included: (1) diagnosed with type 2 diabetes, (2) received a web-enabled glucometer, (3) provided written informed consent and (4) agreed to be contacted by phone or in person for any clarification after the interview. All potentially eligible participants were contacted by telephone and invited to participate in the study. All focus groups interviews were conducted at the health clinic during the follow-up to accommodate participants schedule as much as possible. If participants were not able to attend a focus group session, an individual in-depth interview at their own home was conducted instead.

A set of open-ended questions was employed as the interview guide to capture the experiences of patients in using telemedicine. Interviews were conducted in either in

1  
2  
3 the Malay or English language, led by the first author (JYL). Interviews continued  
4  
5 until the researcher, in discussion with the wider research team considered data  
6  
7 saturation or no new themes or codes could be identified  
8  
9

## 11 **Ethics**

12  
13 The Monash University Research Ethics Committee (CF14/1977 – 2014001016 &  
14  
15 CF15/1073 - 2015000502) and the National Medical Research Register (NMRR-14-  
16  
17 177-19466 & NMRR-14-1368-22943) approved this study. This study was registered  
18  
19 with ClinicalTrials.gov under the registration NCT0246680.  
20  
21  
22  
23

## 24 **Patient and public involvement**

25  
26 The study was designed to understand the patients' views, perception and  
27  
28 experience of using telemedicine for type 2 diabetes management. However,  
29  
30 patients were not included in the design of the study, interview questions or conduct  
31  
32 of study. Patients who participated in this qualitative study did so anonymously, and  
33  
34 thus we could not disseminate the results to study participants.  
35  
36  
37  
38  
39

## 40 **Data Analysis**

41  
42 All sessions were audio recorded and fully transcribed verbatim. These transcripts  
43  
44 were read several times to familiarize with the data. The data were subsequently  
45  
46 analyzed using thematic analysis, allowing the researchers who worked in teams to  
47  
48 identify, analyze and report the patterns or themes within a set of data<sup>18</sup>. All themes  
49  
50 were derived inductively from the data where codes and theme development were  
51  
52 directed by the content of the transcribed data. All coding was checked and  
53  
54  
55  
56  
57  
58  
59  
60

1  
2  
3  
4  
5  
6  
7  
8  
9  
10  
11  
12  
13  
14  
15  
16  
17  
18  
19  
20  
21  
22  
23  
24  
25  
26  
27  
28  
29  
30  
31  
32  
33  
34  
35  
36  
37  
38  
39  
40  
41  
42  
43  
44  
45  
46  
47  
48  
49  
50  
51  
52  
53  
54  
55  
56  
57  
58  
59  
60

iteratively refined using paired analysis of transcripts by two researchers (JYL and SWHL).

For peer review only

## Results

A total of 48 participants were interviewed in the 12 focus group (average 3-4 participants per group) and 2 interview sessions. The participants were mostly females (56.3%), with a mean age of 51.9 years, and a mean duration of diabetes of 5.6 years (Table 1). Four core themes emerged from our interviews: (1) Age is a key factor (2) Its time saving, (3) My family and my life and (4) User experience and data security.

### Theme 1 – Age is a key factor

Overall, we noted that there were two distinct groups of participants with regards to their preference on how to record their blood glucose reading. In general, older participants (those aged 50 years and above) preferred to record their glucose readings manually, using pen and paper. They found that using a telemonitoring device required a lot of technical know-how and that it was a challenging and complex process. As explained by the participants:

I manually record. I do not understand telephone especially opening. To me manual is easier. [Patient 4, 59/F].

But I am an old person I like it to be written. I'm old I need to write down. Anyway as long as someone shows me how to do it I can do it. Of course it's easier because you bring your hand phone everywhere you go. [Patient 5, 57/F]

1  
2  
3  
4  
5  
6  
7  
8  
9 However, participants were generally enthusiastic as they saw the potential benefits  
10 of telemedicine. They expressed the desire and need to have more training and  
11 assistance, especially when they had not used the device for some time, since they  
12 would have forgotten how it functions and to use.  
13  
14  
15  
16  
17  
18  
19

20 For me it's not difficult just need to teach that's all. See the learning condition  
21 first maybe need two or three times. I'm over fifty [years old] so first time will  
22 be a problem .....need to teach a few times before I understand. First time  
23 might be difficult to understand. [Patient 7, 56/M]  
24  
25  
26  
27  
28  
29  
30  
31  
32

33 These participants felt that the use of telemedicine was more suitable for the  
34 younger diabetes patients who were more technology savvy. As one explained it,  
35 "Maybe for the young ones la. Technology for youngsters is more suitable since they  
36 like to sit at home and like the thing called Internet." Some participants also  
37 expressed their preference to meet their health care providers in person and  
38 reported that travelling to the clinic was not an onerous task.  
39  
40  
41  
42  
43  
44  
45  
46  
47

48 I don't mind coming to the clinic and have a chat with the doctor. We discuss  
49 and sometimes we can ask questions and doctors can show it physically.  
50 For me to use the Internet is difficult to learn my children are not here.  
51  
52  
53  
54 [Patient 6, 60/M, Malay].  
55  
56  
57  
58  
59  
60

1  
2  
3  
4  
5  
6  
7 Conversely, younger participants were more inclined to learn and use new  
8 technologies if sufficient training and guidance were given. Additionally, they were  
9 optimistic about using telemedicine to manage their conditions, as they knew the  
10 various benefits that technology would provide, including data tracking ability and  
11 convenience.  
12  
13  
14  
15  
16  
17  
18  
19  
20

21 Digital way. Everyday you can see it in your digital way in the  
22 software so no need to record like manual. Sometime even you record  
23 manual the paper wherever missing. Digital you have a backup.  
24  
25  
26

27 [Patient 8, 35/F]  
28  
29  
30

31  
32 I like this because you can transfer directly to your phone. It's useful to  
33 me as an indication. I prefer that I can use it to check my medicine  
34 effect my glucose. I think that this is the best tools because you can  
35 monitor by the Internet everywhere you go. [Patient 9, 44/M]  
36  
37  
38  
39  
40

41  
42 It's even more convenient since we do not have the time to come and  
43 sometimes some people do not have transport. [Patient 10, 44/F]  
44  
45  
46  
47  
48  
49  
50

## 51 **Theme 2 – Its time saving**

52  
53 Participants expressed that the use of a mobile phone which is connected to a  
54 glucometer is a convenient alternative for the management of diabetes. Participants  
55  
56  
57  
58  
59  
60

1  
2  
3 viewed that it is a more convenient option in the event of time constraints and a lack  
4 of transportation to the clinic. Participants also revealed how having a telemonitoring  
5 device encouraged them to monitor their glucose levels regularly compared to the  
6 quarterly check-ups at the clinic. As expressed by one participant “It’s good to use  
7 especially over the Internet. It’s so much easier we do not have to come to the clinic  
8 and can stay at home (Patient 12, 60/M)”.

### 19 20 **Theme 3 – My family and my life**

21  
22 Our analysis showed that there was some conflicting perspective when it comes to  
23 data sharing. Several participants expressed that they were willing to share their  
24 monitoring results with family members, as they felt that the family member would  
25 keep them accountable to their diabetes management, which was a significant  
26 motivation for them to meet their daily goals.

27  
28  
29 The use of this what you call it [web-telemonitor]..... my health is  
30 good especially when family members want to monitor your sugar  
31 control can monitor as well. [Patient 11, 54/F]

32  
33  
34  
35  
36  
37  
38  
39  
40  
41  
42  
43  
44 It’s a good part because of this you can do it at home. If at the clinic you  
45 get pricked nobody knows but when you do it at home you children will  
46 be informed as well. [Patient 5, 57/F]

1  
2  
3 Conversely, some participants expressed concerned that the sharing of medical  
4 information with their family members might infringe on their personal space and  
5 potentially cause conflicts between members of the family.  
6  
7  
8  
9

10  
11 That thing is okay but what I am afraid of is sometimes conflicts because it  
12 feels like you are being monitored by others. But it is beneficial at least there  
13 is somebody remind you. [Patient 1, 45/M]  
14  
15  
16  
17  
18  
19  
20  
21

#### 22 **Theme 4 – User experience and data security**

23  
24  
25

26 Participants in this study emphasized the importance of having a user-friendly  
27 technology. Most participants in this study reported minor technical difficulties related  
28 to internet connectivity and availability during the study, which limited their ability to  
29 utilize the telemonitoring device effectively. Additionally, participants expressed  
30 concern they had about the presence of malware in telemonitoring devices that could  
31 compromise their personal information.  
32  
33  
34  
35  
36  
37  
38  
39  
40  
41  
42  
43

44 Problem with the Internet. Occasionally we can receive the reading  
45 occasionally are unable too. Very inconvenient. [Patient 11, 54/F].  
46  
47  
48  
49

50 I think depend on the situation where you live in a village very difficult now  
51 also because certain villages you don't have (Internet) line so you still need  
52 have the manual. [Patient 8, 35/F]  
53  
54  
55  
56  
57  
58  
59  
60



1  
2  
3  
4  
5  
6  
7 As explained by one participant, having a robust system which is user-friendly, and  
8 has good support is essential to ensure that the implementation of telemedicine is  
9 successful “Okay (lah) but what happens when there is a virus? It is a problem for  
10 one week my handphone hang. After one week it hang that is a problem” (Patient 13,  
11 54/F).  
12  
13  
14  
15  
16

17 Another aspect which participants were worried of was the costs involved compared  
18 to conventional care and that telemonitoring would only be suitable for affluent  
19 patients.  
20  
21  
22  
23  
24  
25

26 All this (telemedicine) is for people who are wealthy. Of course this is a good  
27 system. [Patient 14, 63/M]  
28  
29  
30  
31  
32

33 Some participants also found that meeting health care providers personally was a  
34 faster method to solve their queries as they felt that health care practitioners would  
35 be able to explain their clinical measures in a more concise manner. As explained by  
36 one participant “Face-to face (consultation) is more important (as) its better. (With)  
37 face-to face (consultation), information is clearer, more satisfying and friendly  
38 (Patient 2, 67F).”  
39  
40  
41  
42  
43  
44  
45  
46  
47  
48  
49  
50  
51  
52  
53  
54  
55  
56  
57  
58  
59  
60

## Discussion

In our study, we present the conditions for the success of a telemonitoring health device for managing type 2 diabetes, from patients' perspective. We identified a set of distinctive but interrelated condition which is central to the success of such programs. Firstly, participants' demographics played a crucial factor in ensuring the acceptability of telemedicine. We noted that younger participants between ages of 29-50 years old preferred using a web-based glucometer compared to older participants who preferred recording their results manually. Such outcome is not surprising as young individuals who grew up in this digital era are usually more technologically savvy compared to their older counterparts<sup>19 20</sup>. Participants cited various reasons for being unable to use a web-based glucometer, among them were the lack of Internet connection especially in the rural areas. Indeed, concerns about the stability of Internet connection was the biggest barrier in using telemedicine in diabetes care in this study. The need for a simple, user friendly technology was also consistently highlighted, to encourage acceptability among participants to use a remote telemonitoring system<sup>8 21 22</sup>.

As telemedicine technology is improving continuously, participants expressed enthusiasm on the potential added value of telemedicine. Most participants were willing to incorporate technology as part of their diabetes management, but expressed the need to have sufficient training and on-going support, especially when they encountered issues such as equipment limitations. Our study also identified the potential benefits which fueled participants' enthusiasm towards telemedicine. These include receiving alerts, being able to respond to SMBG readings with advice from a

1  
2  
3 health care professional; as well as reducing opportunity cost incurred when using  
4 telemedicine<sup>23</sup>. Our study also offers an additional perspective and insight into the  
5 importance of patient-provider relationship. Our results support previous research  
6 which indicated that personal interaction with a health care practitioner was an  
7 important aspect to support type 2 diabetes patients, especially when it involves  
8 SMBG<sup>24</sup>. This view was also expressed by most participants in the present study,  
9 and also that a lack of emotional support especially when communicating through  
10 remote telemonitoring resulted in participants dropping out of the study<sup>9</sup>.

11  
12  
13  
14  
15  
16  
17  
18  
19  
20  
21  
22 Our study also noted that not all participant perceive enhanced SMBG as a positive  
23 tool to help achieve good glycemetic control. Some participants in this study expressed  
24 reservation on the feedback and monitoring feature, which they felt intruded into their  
25 personal space. They also expressed some tension between achieving good  
26 glycemetic control and quality of life, especially with the involvement of health care  
27 providers and family members whom they felt were acting as a “police”. As a results,  
28 some of these patients opted not to take part in the study, for fear that this could  
29 further amplify the tension and strain the relationship, an outcome which they  
30 definitely did not want. By exploring the insights of patients, we illustrate how family  
31 values and technology literacy could influence participants’ opinion on  
32 telemonitoring. Our study was also culturally specific to an Asian context and thus,  
33 we could gain an in-depth understanding and broader views of participants’  
34 behaviors when managing diabetes.

35  
36  
37  
38  
39  
40  
41  
42  
43  
44  
45  
46  
47  
48  
49  
50  
51  
52 There were some limitations to our study. Firstly, although we had included a diverse  
53 sample of participants and reached thematic saturation in our interviews, these  
54  
55  
56  
57  
58  
59  
60

1  
2  
3 participants are only limited to one geographical location in Malaysia. Participants  
4  
5 were from suburban districts in Selangor where connectivity and technology literacy  
6  
7 were moderate. Future studies should include patients from both urban as well as  
8  
9 rural location and those with high technology literacy, as this could potentially  
10  
11 influence the uptake and acceptability of telemedicine. While published literature  
12  
13 suggest that the trends are likely generalizable to other regions in Malaysia, the  
14  
15 context may differ among other countries and settings. The views expressed here  
16  
17 are solely from a patients' point and does not represent the views of health care  
18  
19 providers or policy makers. Finally, our sample size was not large enough to draw  
20  
21 definitive conclusion regarding differences in provider practices, patient knowledge  
22  
23 as well as attitudes from different clinic sites.  
24  
25  
26  
27  
28  
29  
30

### 31 **Implications for practice**

32  
33 The continual improvements in technology will facilitate the use of telemedicine in  
34  
35 future. The largest implication will be its ability to reduce logistical barriers as well as  
36  
37 saves time. However, it is important to also consider the economic standing of  
38  
39 patients living in rural areas, who may have limited internet connectivity. As such,  
40  
41 health care professionals and policy makers need to consider these aspects prior to  
42  
43 introducing any telemedicine technology for their patients to ensure that patients'  
44  
45 expectations are met.  
46  
47  
48  
49

50 Another theme that emerged from this interview was the need to invest in capacity  
51  
52 building especially in human resources. Specifically, the creation of training  
53  
54 programs for both public as well as health workers are particularly important,  
55  
56  
57  
58  
59  
60

1  
2  
3  
4  
5  
6  
7  
8  
9  
10  
11  
12  
13  
14  
15  
16  
17  
18  
19  
20  
21  
22  
23  
24  
25  
26  
27  
28  
29  
30  
31  
32  
33  
34  
35  
36  
37  
38  
39  
40  
41  
42  
43  
44  
45  
46  
47  
48  
49  
50  
51  
52  
53  
54  
55  
56  
57  
58  
59  
60

especially among the non-IT savvy groups. In addition, there is also a need to simultaneously create a policy for the integration of telemedicine into the health service system and aligning it to correspond with local and national health strategies.

For peer review only

## Conclusion

In conclusion, findings from this study indicate that the implementation of telemonitoring requires strategic planning with inputs from various stakeholders including, educators, health care providers, telco service providers and patients. These need to take into consideration the patient's personal and contextual factors, which could have a positive or negative effect. As such, health care providers need to discuss patients' perspective to ensure the optimal use of telemedicine to improve patients' clinical parameters and quality of life.

## Acknowledgements

The authors would like to thank all participants and health providers who contributed their time to share their perspectives with us.

## Funding source

This study was supported by the e-Science fund from the Ministry of Science, Technology and Innovation, Malaysia [03-02-10-SF0238 (MOSTI)], Telemedicine Cluster, Tropical Medicine and Biology platform, Monash University Malaysia (52140757-314-00) and SEGi University Research Fund (SEGi/2013/SKK/04/1).

## Author Disclosure Statement

The authors report no conflict of interests.

## Author Contributions

All authors named contributed substantially to the document. JYL conducted and transcribed the interview, interpreted the results and wrote the draft manuscript. SWHL obtained the funding, designed the study and provided support in editing the manuscript. CKYC, SSC, CJN, TP, KKCL, CPW, NHN and CSST contributed to the study design and critical review of the manuscript. All authors approved the final version.

## Data sharing statement

All data generated or analysed during this study are included in this published article. They can be made available from the corresponding author on reasonable request.

1  
2  
3  
4  
5  
6  
7  
8  
9  
10  
11  
12  
13  
14  
15  
16  
17  
18  
19  
20  
21  
22  
23  
24  
25  
26  
27  
28  
29  
30  
31  
32  
33  
34  
35  
36  
37  
38  
39  
40  
41  
42  
43  
44  
45  
46  
47  
48  
49  
50  
51  
52  
53  
54  
55  
56  
57  
58  
59  
60

For peer review only



## References

1. Ogurtsova K, da Rocha Fernandes JD, Huang Y, et al. IDF Diabetes Atlas: Global estimates for the prevalence of diabetes for 2015 and 2040. *Diabetes Research and Clinical Practice* 2017;128:40-50. doi: 10.1016/j.diabres.2017.03.024
2. American Diabetes Association. 5. Glycemic Targets. *Diabetes Care* 2016;39(Supplement 1):S39-S46. doi: 10.2337/dc16-S008
3. Farmer AJ, Perera R, Ward A, et al. Meta-analysis of individual patient data in randomised trials of self monitoring of blood glucose in people with non-insulin treated type 2 diabetes. *BMJ* 2012;344 doi: 10.1136/bmj.e486
4. Malanda UL, Welschen LMC, Riphagen II, et al. Self-monitoring of blood glucose in patients with type 2 diabetes mellitus who are not using insulin. *Cochrane Database of Systematic Reviews* 2012(1) doi: 10.1002/14651858.CD005060.pub3
5. Lee SWH, Ooi L, Lai YK. Telemedicine for the Management of Glycemic Control and Clinical Outcomes of Type 1 Diabetes Mellitus: A Systematic Review and Meta-Analysis of Randomized Controlled Studies. *Frontiers in Pharmacology* 2017;8:330. doi: 10.3389/fphar.2017.00330
6. Polonsky WH, Fisher L, Schikman CH, et al. Structured Self-Monitoring of Blood Glucose Significantly Reduces A1C Levels in Poorly Controlled, Noninsulin-Treated Type 2 Diabetes. *Results from the Structured Testing Program study* 2011;34(2):262-67. doi: 10.2337/dc10-1732
7. Fisher L, Polonsky WH, Parkin CG, et al. The impact of structured blood glucose testing on attitudes toward self-management among poorly controlled, insulin-naive patients with type 2 diabetes. *Diabetes Research and Clinical Practice* 2012;96(2):149-55. doi: 10.1016/j.diabres.2011.12.016
8. Lee JY, Lee SWH, Nasir NH, et al. Diabetes telemonitoring reduces the risk of hypoglycaemia during Ramadan: a pilot randomized controlled study. *Diabetic Medicine* 2015;32(12):1658-61. doi: 10.1111/dme.12836
9. Lee JY, Wong CP, Tan CSS, et al. Telemonitoring in fasting individuals with Type 2 Diabetes Mellitus during Ramadan: A prospective, randomised controlled study. *Scientific Reports* 2017;7(1):10119. doi: 10.1038/s41598-017-10564-y
10. Lee SWH, Lee JY, San San Tan C, et al. Strategies to make Ramadan fasting safer in type 2 diabetics: a systematic review and network meta-analysis of randomized controlled trials and observational studies. *Medicine* 2016;95(2)
11. Paré G, Jaana M, Sicotte C. Systematic Review of Home Telemonitoring for Chronic Diseases: The Evidence Base. *Journal of the American Medical Informatics Association : JAMIA* 2007;14(3):269-77. doi: 10.1197/jamia.M2270
12. Pare G, Moqadem K, Pineau G, et al. Clinical effects of home telemonitoring in the context of diabetes, asthma, heart failure and hypertension: a systematic review. *J Med Internet Res* 2010;12(2):e21. doi: 10.2196/jmir.1357 [published Online First: 2010/06/18]
13. Jaana M, Pare G. Home telemonitoring of patients with diabetes: A systematic assessment of observed effects. *Journal of evaluation in clinical practice* 2007;13(2):242-53. doi: 10.1111/j.1365-2753.2006.00686.x

14. Lee SWH, Chan CKY, Chua SS, et al. Comparative effectiveness of telemedicine strategies on type 2 diabetes management: A systematic review and network meta-analysis. *Scientific reports* 2017;7(1):12680. doi: 10.1038/s41598-017-12987-z [published Online First: 2017/10/06]
15. Piette JD, Marinec N, Gallegos-Cabriaes EC, et al. Spanish-speaking patients' engagement in interactive voice response (IVR) support calls for chronic disease self-management: data from three countries. *Journal of telemedicine and telecare* 2013;19(2):89-94.
16. Kruse CS, Krowski N, Rodriguez B, et al. Telehealth and patient satisfaction: a systematic review and narrative analysis. *BMJ Open* 2017;7(8) doi: 10.1136/bmjopen-2017-016242
17. Lee JY, Chan CKY, Chua SS, et al. Intervention for Diabetes with Education, Advancement and Support (IDEAS) study: protocol for a cluster randomised controlled trial. *BMC Health Services Research* 2016;16(1):524. doi: 10.1186/s12913-016-1782-y
18. Nowell LS, Norris JM, White DE, et al. Thematic Analysis: Striving to Meet the Trustworthiness Criteria. *International Journal of Qualitative Methods* 2017;16(1):1609406917733847. doi: 10.1177/1609406917733847
19. Zailani S, Gilani MS, Nikbin D, et al. Determinants of Telemedicine Acceptance in Selected Public Hospitals in Malaysia: Clinical Perspective. *Journal of Medical Systems* 2014;38(9):111. doi: 10.1007/s10916-014-0111-4
20. Georgsson M, Staggers N. Quantifying usability: an evaluation of a diabetes mHealth system on effectiveness, efficiency, and satisfaction metrics with associated user characteristics. *Journal of the American Medical Informatics Association* 2016;23(1):5-11. doi: 10.1093/jamia/ocv099
21. J E, D K. Telehealth as adjunctive therapy in insulin pump treated patients: a pilot study. *Practical Diabetes International* 2010;27(1):9-10i. doi: doi:10.1002/pdi.1430
22. Kruse CS, Mileski M, Moreno J. Mobile health solutions for the aging population: A systematic narrative analysis. *Journal of Telemedicine and Telecare* 2017;23(4):439-51. doi: 10.1177/1357633x16649790
23. Lee JY, Lee SWH. Is telemedicine cost effectiveness for diabetes management: A systematic review. *Diabetes Technology & Therapeutics* 2018;20(7):492-500.
24. Heisler M, Bouknight RR, Hayward RA, et al. The relative importance of physician communication, participatory decision making, and patient understanding in diabetes self-management. *Journal of general internal medicine* 2002;17(4):243-52.

**Table 1: Baseline demographics of participants who participated in the focus group**

| Patients (n= 48)                           | Men (n = 21) | Women (n = 27) |
|--------------------------------------------|--------------|----------------|
| Age (years)                                | 54.19        | 50.15          |
| Range                                      | 29-62        | 31-69          |
| Duration of diabetes (years)               | 4.06         | 6.88           |
| Range                                      | 0.83-24      | 0.5-15         |
| No of oral hypoglycemic agents used, n (%) |              |                |
| 1-2                                        | 18 (85)      | 27 (100)       |
| ≥3                                         | 1 (4)        | 0 (0)          |
| No of antihypertension drugs used, n (%)   |              |                |
| 1-2                                        | 9 (42)       | 11 (40)        |
| ≥3                                         | 3 (14)       | 7 (25)         |
| Insulin use, n (%)                         |              |                |
| Yes                                        | 4 (19)       | 2 (7)          |
| No                                         | 17 (81)      | 25 (93)        |

Data are expressed as mean, unless otherwise stated.

**Box 1: IDEAS study**

The Intervention for Diabetes with Education, Advancement and Support (IDEAS) study is a cluster randomized controlled study to evaluate the use of telemedicine to improve diabetes care. Participants in the telemedicine group were instructed to measure their blood glucose at least twice weekly (one fasting and one non-fasting) or more frequent as recommended by physician. These blood glucose readings will be transmitted via a Bluetooth technology to the participants' mobile phone to a remote secure server. Participants and their physicians were able to access the records on the server. Advice on lifestyle modification, any potential changes in medication, who and how to contact their healthcare providers were also given monthly during the study. A researcher also checked participants' results weekly and initiate intervention if needed (e.g. medication changes, counselling) with the consent of the attending physician.

# BMJ Open

## Using telemedicine to support care for people with type 2 diabetes mellitus: A qualitative analysis of patient's perspective

|                                 |                                                                                                                                                                                                                                                                                                                                                                                                                                                                                                                                                                                                                                                                                                  |
|---------------------------------|--------------------------------------------------------------------------------------------------------------------------------------------------------------------------------------------------------------------------------------------------------------------------------------------------------------------------------------------------------------------------------------------------------------------------------------------------------------------------------------------------------------------------------------------------------------------------------------------------------------------------------------------------------------------------------------------------|
| Journal:                        | <i>BMJ Open</i>                                                                                                                                                                                                                                                                                                                                                                                                                                                                                                                                                                                                                                                                                  |
| Manuscript ID                   | bmjopen-2018-026575.R1                                                                                                                                                                                                                                                                                                                                                                                                                                                                                                                                                                                                                                                                           |
| Article Type:                   | Original research                                                                                                                                                                                                                                                                                                                                                                                                                                                                                                                                                                                                                                                                                |
| Date Submitted by the Author:   | 25-Apr-2019                                                                                                                                                                                                                                                                                                                                                                                                                                                                                                                                                                                                                                                                                      |
| Complete List of Authors:       | Lee, Jun Yang; Monash University - Malaysia Campus, School of Pharmacy; SEGi University Kota Damansara<br>Chan, Carina; La Trobe University College of Science Health and Engineering<br>Chua, Siew Siang; Taylor's University - Lakeside Campus, School of Pharmacy<br>Paraidathathu, Thomas; Taylor's University - Lakeside Campus, School of Pharmacy<br>Lee, Kenneth Kwing-Chin; Monash University - Malaysia Campus, School of Pharmacy<br>Tan, Christina; HELP International Corporation Bhd<br>Nasir, Nazrila; Kementerian Kesihatan Malaysia<br>Lee, Shaun Wen Huey ; Monash University - Malaysia Campus, School of Pharmacy; Taylor's University - Lakeside Campus, School of Pharmacy |
| <b>Primary Subject Heading</b>: | Diabetes and endocrinology                                                                                                                                                                                                                                                                                                                                                                                                                                                                                                                                                                                                                                                                       |
| Secondary Subject Heading:      | Health informatics, Health services research, Patient-centred medicine, Qualitative research                                                                                                                                                                                                                                                                                                                                                                                                                                                                                                                                                                                                     |
| Keywords:                       | General diabetes < DIABETES & ENDOCRINOLOGY, QUALITATIVE RESEARCH, Telemedicine < BIOTECHNOLOGY & BIOINFORMATICS                                                                                                                                                                                                                                                                                                                                                                                                                                                                                                                                                                                 |
|                                 |                                                                                                                                                                                                                                                                                                                                                                                                                                                                                                                                                                                                                                                                                                  |

SCHOLARONE™  
Manuscripts

1  
2  
3  
4  
5 **Using telemedicine to support care for people with type 2 diabetes mellitus: A**  
6  
7 **qualitative analysis of patient's perspective**  
8  
9

10  
11  
12 Short running title: Patient's perspective of telemedicine  
13  
14

15  
16 <sup>1</sup>Jun Yang LEE <sup>2,3</sup>Carina Ka Yee CHAN, <sup>4</sup>Siew Siang CHUA, <sup>4</sup>Thomas  
17  
18 PARAIIDATHATHU, <sup>1</sup>Kenneth Kwing-Chin LEE, <sup>5</sup>Christina San San TAN, <sup>6</sup>Nazila  
19  
20 NASIR, <sup>1,7</sup>Shaun Wen Huey LEE  
21  
22

23  
24  
25  
26 <sup>1</sup>School of Pharmacy, Monash University Malaysia, Jalan Lagoon Selatan, Bandar  
27  
28 Sunway, 47500, Subang Jaya, Selangor, Malaysia.

29  
30 <sup>2</sup> School of Psychology and Public Health, College of Science, Health and  
31  
32 Engineering, La Trobe University, Australia.

33  
34  
35 <sup>3</sup>Jeffrey Cheah School of Medicine and Health Sciences, Monash University  
36  
37 Malaysia, Jalan Lagoon Selatan, Bandar Sunway, 47500, Subang Jaya, Selangor,  
38  
39 Malaysia.

40  
41  
42 <sup>4</sup>School of Pharmacy, Faculty of Health and Medical Sciences, Taylor's University  
43  
44 Malaysia, 47500 Subang Jaya, Selangor, Malaysia.

45  
46  
47 <sup>5</sup>Centre for Pre-University Studies, HELP College of Arts and Technology, Kuala  
48  
49 Lumpur, Malaysia.

50  
51 <sup>6</sup>Klinik Kesihatan Putrajaya, Putrajaya, Malaysia.

52  
53  
54 <sup>7</sup>Asian Centre for Evidence Synthesis in Population, Implementation and Clinical  
55  
56 Outcomes (PICO), Health and Well-being Cluster, Global Asia in the 21st Century  
57  
58 (GA21) Platform, Monash University Malaysia, Bandar Sunway, Selangor Malaysia  
59  
60

1  
2  
3  
4  
5  
6 *Corresponding author and person in who reprint request should be addressed to*  
7

8 Shaun Lee Wen Huey  
9

10 School of Pharmacy  
11

12 Monash University Malaysia  
13

14 Jalan Lagoon Selatan,  
15

16 47500 Bandar Sunway,  
17

18 Selangor Darul Ehsan,  
19

20 Malaysia.  
21

22 Telephone: +60 3 5514 5890  
23

24 Fax: +60 3 5514 6364  
25

26 Email: [shaun.lee@monash.edu](mailto:shaun.lee@monash.edu)  
27  
28  
29  
30  
31  
32

33 Keywords: telemedicine; qualitative; patient perspective; barriers; diabetes  
34  
35  
36  
37

38 Word count: 3,437 words  
39  
40  
41  
42  
43  
44  
45  
46  
47  
48  
49  
50  
51  
52  
53  
54  
55  
56  
57  
58  
59  
60

## Abstract

**Objective:** Telemedicine has been promoted as an economical and effective way to enhance patient care but its acceptability among patients in low and middle income countries are still poorly understood. This study aimed to explore the experiences and perspective of people with type 2 diabetes mellitus patients who use telemedicine to manage their condition.

**Design:** We conducted in-depth and focus group interviews with participants who used telemedicine. Questions included participants' perception of program use, satisfaction as well as engagement with program. All interviews and focus groups were audio-recorded and transcribed verbatim. The data were analyzed using a thematic approach.

**Participants and setting:** All people with type 2 diabetes who participated in a randomized controlled study examining the use of telemedicine for the management of diabetes.

**Results:** Twelve focus groups and two in-depth interviews with 48 adults were conducted and four themes emerged from the analysis. (1) Generational difference (2) Independence and convenience, (3) Sharing health data and privacy; and (4) Concerns and challenges. The main barriers to using telemedicine were related to the user friendliness of the devices as well as internet connectivity. Cost was also another significant concern raised by participants. However, participants generally were positive about the benefits of telemedicine, including reduction in clinic visits, ability to provide real time data and disease monitoring.

**Conclusion:** Despite the potential positive benefits of using telemedicine for diabetes care, several barriers could inhibit the sustained and effective use of this technology.



1  
2  
3 As such, collaboration between educators, health care providers, telecommunication  
4 service providers and patients is required to stimulate telemedicine adoption and use.  
5  
6  
7  
8  
9  
10  
11  
12  
13  
14  
15  
16  
17  
18  
19  
20  
21  
22  
23  
24  
25  
26  
27  
28  
29  
30  
31  
32  
33  
34  
35  
36  
37  
38  
39  
40  
41  
42  
43  
44  
45  
46  
47  
48  
49  
50  
51  
52  
53  
54  
55  
56  
57  
58  
59  
60

For peer review only

### Strengths and limitations of this study

- Article followed the Standards for reporting qualitative Research (SRQR) recommendations on reporting
- Focus group discussion allowed the exchange of opinions about telemedicine, leading to richer information
- View and experiences of using telemedicine from patients were captured rather than that of healthcare providers
- The study was conducted in an urban setting in Malaysia and its applicability and transferability to other population remains unknown.

## Introduction

Diabetes is a major health concern worldwide, and according to a recent report by the International Diabetes Federation, the global prevalence of diabetes will increase from 415 million in 2015 to 642 million in 2040.<sup>1</sup> The prevalence varies considerably between different regions, but the epicenter of the diabetes crisis is currently located in the Western Pacific and South-East Asia region, with 159 million and 82 million individuals with diabetes respectively.<sup>2</sup> In many individuals with diabetes, self-monitoring of blood glucose (SMBG) is considered a key component of treatment, and widely recommended by clinical practice guidelines irrespective of treatment strategy.<sup>3-5</sup> SMBG is often used as an early warning sign for detecting hypoglycaemia, for improving the recognition of severe hyperglycaemia, to encourage physical activities as well as improve diet control. These data are also often used by the treating physician to facilitate an individualized treatment regimen.

Despite these potential benefits, there is controversy on the efficacy of SMBG especially in non-insulin dependent type 2 diabetes due to its cost, uncertainty on frequency of testing as well as impact on patients' general health and well-being.<sup>6-8</sup> Studies have shown that the use of enhanced SMBG (where there are high levels of engagement between patients and clinicians to interpret the SMBG values) resulted in larger HbA1c reduction compared to regular SMBG.<sup>4 9-11</sup>

The application of telemedicine, or technology to deliver various aspects of health information, prevention, monitoring and medical care in diabetes management has been suggested as an innovative solution to improve diabetes care.<sup>12-14</sup> Increasingly,

1  
2  
3 telemedicine is being viewed as a promising technology in assisting patients to  
4 manage their diabetes,<sup>13 15 16</sup> as it produces accurate and reliable data<sup>17</sup>, empowers  
5 patients<sup>12</sup>, improves glycaemic control and influences their attitude and behaviours<sup>16</sup>  
6  
7  
8  
9  
10  
11  
12  
13  
14  
15  
16  
17  
18  
19  
20  
21  
22  
23  
24  
25  
26  
27  
28  
29  
30  
31  
32  
33  
34  
35  
36  
37  
38  
39  
40  
41  
42  
43  
44  
45  
46  
47  
48  
49  
50  
51  
52  
53  
54  
55  
56  
57  
58  
59  
60

telemedicine is being viewed as a promising technology in assisting patients to manage their diabetes,<sup>13 15 16</sup> as it produces accurate and reliable data<sup>17</sup>, empowers patients<sup>12</sup>, improves glycaemic control and influences their attitude and behaviours<sup>16</sup>, potentially leading to a better quality of life.<sup>19</sup> Additionally, telemedicine has the potential to reduce the barrier to adherence of self-management through real-time data transfer between patient and provider, the review of blood glucose measurement trends, and a reduction in opportunity costs. These telemedicine services can be categorized to either synchronous (real-time), asynchronous (whereby data is stored and forwarded subsequently) and continuous (remote monitoring). In diabetes care, all forms of telemedicine services have been examined and include using mobile phones, texting, emails, e-health portals, videoconferencing as well as devices.<sup>20</sup>

However, implementation of a telemedicine service in conventional care is a complex process. Studies have shown that while telemedicine can expand the boundaries of care to a larger population and offer person-centred care,<sup>21</sup> there are examples of patient resistance to change.<sup>22 23</sup> Nevertheless, one of the major limitation of existing literature is the lack of studies which has examined the perspective of patients from a low and middle income country, where telemedicine is now increasingly being used. Therefore, the goal of this study was to explore patients' views and experiences of telemedicine for diabetes management in Malaysia.

## Materials and Methods

### Study design

The present qualitative study was part of a larger multi-centre cluster randomized controlled study, IDEAS conducted between April 2015 to June 2017 which aimed to examine the impact of a telemedicine program for people with type 2 diabetes (Box 1).<sup>24</sup> This nested study design allowed the investigators to explore the facilitators and barriers to using telemedicine, as well as participants' view if telemedicine was implemented in routine practice.

### Participants

Participants were recruited from eleven primary care clinics located within the Klang Valley, which is part of the Ministry of Health Malaysia's primary care clinic network. These clinics serves the districts of Klang and Petaling, which provides care for approximately 2.56 million individuals and can be considered to be nationally representative of primary care clinics in Malaysia.

On completion of the IDEAS trial, participants from the trial were invited to participate in the current qualitative study. All potentially eligible participants were contacted by telephone and invited to participate in the qualitative study. Participants were briefed regarding the purpose, procedure and nature of the study and allowed to clarify their doubts. A separate information sheet and written informed consent were obtained prior to participation. All focus groups interviews were conducted at the respective health

1  
2  
3 clinic, when participants visited the clinics for their follow-up sessions with their  
4  
5 physicians to accommodate participants' schedule. In the event that a participant was  
6  
7 not able to attend a focus group session, an individual in-depth interview was  
8  
9 conducted at their own home. Study participants were incentivized with a RM50  
10  
11 (approximately USD\$12) voucher for their participation.  
12  
13  
14  
15  
16

### 17 **Interview schedule**

18  
19  
20  
21 A semi-structured interview was used in all the focus groups, which was based on an  
22  
23 interview guide. Table 1 outlines the topic areas and key questions which were used  
24  
25 during the discussions. The topic guide aimed to capture the experiences of patients  
26  
27 in using telemedicine and was developed based on relevant literature.<sup>8 10 23</sup>  
28  
29  
30  
31  
32

33 The interviews were conducted either in the Malay or English language, which was  
34  
35 facilitated by the first author (JYL). The interviews usually lasted between 35 - 44  
36  
37 minutes in an undisturbed room in the clinic. All interview sessions were digitally  
38  
39 recorded, transcribed verbatim immediately after the interview and checked for  
40  
41 accuracy by SWHL. Interviews were conducted to explore for emerging themes with  
42  
43 simultaneous analysis of data until data saturation was achieved, when no new  
44  
45 themes or codes were identified.  
46  
47  
48  
49  
50

### 51 **Data analysis**

52  
53 The NVivo software version 11 (QSR International Pty Ltd) was used to organized and  
54  
55 code the data for thematic analysis.<sup>25</sup> All transcripts were read several times to  
56  
57 familiarize with the data. Transcripts were translated from Malay language to English  
58  
59  
60

1  
2  
3 by an independent research assistant. The translated English transcripts were double  
4  
5 checked by one of the authors (JYL) and any discrepancies were resolved via  
6  
7 discussion with another of the authors (SWHL). The data were subsequently coded,  
8  
9 based upon keywords or phrases that appeared to convey an opinion or perception  
10  
11 regarding telemedicine. These initial codes were further examined and refined, with  
12  
13 codes combined to be main themes if they had similar contexts or split into subthemes.  
14  
15 The final codes were summarized, cross checked and iteratively refined using paired  
16  
17 analysis of transcripts by two researchers (JYL and SWHL). In the event that there  
18  
19 was a divergent interpretation, the transcripts were reviewed again and discussed until  
20  
21 consensus was achieved.  
22  
23  
24  
25  
26  
27

## 28 **Ethics**

29  
30 The study was approved by the Monash University Research Ethics Committee  
31  
32 (CF14/1977 – 2014001016 & CF15/1073 - 2015000502) and the National Medical  
33  
34 Research Register (NMRR-14-177-19466 & NMRR-14-1368-22943). All participants  
35  
36 provided written informed consent for participation in the research. This study was  
37  
38 registered with ClinicalTrials.gov under the registration NCT0246680.  
39  
40  
41  
42  
43

## 44 **Patient and public involvement**

45  
46 The current study was designed to understand the patients' views, perception and  
47  
48 experience of using telemedicine for type 2 diabetes management. Patients were not  
49  
50 involved in the initial design of the study, development of interview questions or  
51  
52 conduct of study. All participants who participated in this qualitative study were not  
53  
54 provided with the results but were informed that the results will be published in a  
55  
56 peer-review journal.  
57  
58  
59  
60

## Results

### Demographics of participants

A total of 48 participants were interviewed in the 12 focus group (average 3-4 participants per group) and 2 interview sessions. The participants were mostly females (56.3%), with a mean age of 51.9 years, and a mean duration of diabetes of 5.6 years (Table 2). Four core themes emerged from the focus groups and the two in-depth interviews: (1) Generational difference (2) Independence and convenience, (3) Sharing health data and privacy; and (4) Concerns and challenges

#### Theme 1 – Generational differences

We noted that there were generational differences with regards to their preference on how to record their blood glucose reading. In general, older participants (those aged 50 years and above) preferred to record their glucose readings manually, using pen and paper. They found that using a telemonitoring device required a lot of technical know-how and this was a challenging and complex process. As explained by the participants:

I (prefer to) manually record (my blood glucose readings). I do not understand (how to operate the mobile) telephone especially opening (the software). To me manual (recording) is easier. [Patient 4, 59/F].

But I am an old person (and so) I like it (blood glucose results) to be written. I'm old (and) I need to write (the results) down. Anyway as long as someone



1  
2  
3 shows me how to do it I can do it. Of course (using telemedicine) is easier  
4  
5 because you bring your hand phone everywhere you go. [Patient 5, 57/F]  
6  
7  
8  
9

10 These participants felt that the use of telemedicine was more suitable for younger  
11 people with diabetes who were more technology savvy. As explained by one  
12 participant, “Maybe for the young ones (lah). Technology (is) for youngsters (and) is  
13 more suitable since they like to sit at home and like the thing called Internet. [Patient  
14 41, 67/M]” Some participants also expressed their preference to meet their health care  
15 providers in person and reported that travelling to the clinic was not an onerous task.  
16  
17  
18  
19  
20  
21  
22  
23  
24  
25

26 I don't mind coming to the clinic and have a chat with the doctor. We (can)  
27 discuss (my medical condition) and sometimes we can ask questions and  
28 doctors can show (my problem to me) physically. For me to use the Internet  
29 is difficult to learn (as) my children are not here. [Patient 6, 60/M].  
30  
31  
32  
33  
34  
35  
36  
37

38 Conversely, younger participants were more inclined to learn and use new  
39 technologies if sufficient training and guidance were given. Additionally, they were  
40 optimistic about using telemedicine to manage their conditions, as they knew the  
41 various benefits that technology would provide, including data tracking ability and  
42 convenience.  
43  
44  
45  
46  
47  
48  
49  
50

## 51 **Theme 2 – Independence and convenience**

52 Participants expressed that the use of a mobile phone which is connected to a  
53 glucometer is a convenient alternative for the management of diabetes. Participants  
54 viewed that it is a more convenient option in the event of time constraints and a lack  
55  
56  
57  
58  
59  
60

1  
2  
3 of transportation to the clinic. Participants also revealed that having a telemonitoring  
4 device encouraged them to monitor their glucose levels regularly compared to the  
5 quarterly check-ups at the clinic. As expressed by one participant “It’s good to use  
6 especially over the Internet. It’s so much easier we do not have to come to the clinic  
7 and can stay at home [Patient 12, 60/M]”.

8  
9  
10  
11  
12  
13  
14  
15  
16  
17 Digitals way (is the preferred choice). Everyday you can see (your blood  
18 glucose results) in the software so (there is) no need to record like  
19 manual. Sometime even you record manual the paper will go wherever  
20 (or) missing. (Using) digital you have a backup. [Patient 8, 35/F]

21  
22  
23  
24  
25  
26  
27  
28 I like this because you can transfer (your blood glucose results)  
29 directly to your phone. It’s useful to me as an indication. I prefer (using  
30 technology so) that I can use it to check how my medicine affects my  
31 glucose. I think that this is the best tools because you can monitor by  
32 the Internet everywhere you go. [Patient 9, 44/M]

33  
34  
35  
36  
37  
38  
39  
40  
41  
42 It’s even more convenient since we do not have the time to come (to the  
43 clinic) and sometimes some people do not have transport. [Patient 10,  
44  
45  
46  
47 44/F]

48  
49  
50  
51 Most participants were generally enthusiastic as they saw the potential benefits of  
52 telemedicine. Participants described how the use of a web-based glucometer was  
53 useful as it could provide them with reminders and alerts as well as the ability to  
54 connect with their healthcare providers without going to the clinic. Nevertheless, they  
55  
56  
57  
58  
59  
60

1  
2  
3 expressed the desire and need to have more training and assistance, especially when  
4 they had not used the device for some time, since they would have forgotten how it  
5 functions and to use.  
6  
7  
8  
9

10  
11  
12 For me it's not difficult ... just need to teach (me) that's all. See the learning  
13 condition first (and perhaps I need more training), maybe need two or three  
14 times. I'm over fifty (years old) so (the) first time will be a problem .....need  
15 to teach a few times before I understand. First time might be difficult to  
16 understand. [Patient 7, 56/M]  
17  
18  
19  
20  
21  
22  
23  
24  
25  
26  
27  
28  
29

### 30 31 **Theme 3 – Sharing health data and privacy**

32  
33  
34  
35 Our analysis showed that there was some conflicting perspective with data sharing.  
36 Several participants expressed that they were willing to share their monitoring results  
37 with family members, as they felt that the family member would make them  
38 accountable for their diabetes management, which was a significant motivation for  
39 them to meet their daily goals.  
40  
41  
42  
43  
44  
45  
46  
47  
48

49 The use of this what you call it (web-telemonitor)..... my health is good  
50 especially when family members want to monitor your sugar control can  
51 monitor as well. [Patient 11, 54/F]  
52  
53  
54  
55  
56  
57  
58  
59  
60

1  
2  
3 The good part (of telemedicine is) you can do it at home. If (you check  
4 your blood glucose levels) at the clinic you get pricked (but) nobody  
5 knows (the results)... but when you do it at home you children will be  
6 informed as well. [Patient 5, 57/F]  
7  
8  
9  
10  
11  
12  
13  
14  
15  
16

17 Conversely, some participants expressed concern that the sharing of medical  
18 information with their family members might infringe on their personal space and could  
19 potentially cause conflicts between family members.  
20  
21  
22  
23  
24  
25

26 That thing is okay but what I am afraid of is (that the use of telemonitoring may)  
27 sometimes (cause) conflicts because it feels like you are being monitored by  
28 others. But it is beneficial, at least there is somebody remind you. [Patient 1,  
29 45/M]  
30  
31  
32  
33  
34  
35  
36  
37

38 Participants expressed concern they had about the presence of malware in  
39 telemonitoring devices that could compromise their personal information.  
40  
41  
42  
43

44 (What happens when we have a) problem with the Internet (connection).  
45 Occasionally we (may) receive the reading, but occasionally (we will be) unable  
46 to (do so). (This can be) very inconvenient. [Patient 11, 54/F].  
47  
48  
49  
50  
51  
52  
53  
54  
55

56 Some participants felt that meeting or contacting their health care providers was a  
57 simpler and faster way to solve their queries as the health care practitioners would  
58  
59  
60

1  
2  
3 be able to explain their clinical measures in a more concise manner. As explained by  
4 one participant “Face-to face (consultation) is more important (as) its better. (With)  
5 face-to face (consultation), information is clearer and more satisfying to me. [Patient  
6 2, 67F].”  
7  
8  
9  
10  
11  
12  
13

#### 14 **Theme 4 – Concerns and challenges**

15  
16  
17  
18  
19 Participants in this study emphasized the importance of having a user-friendly  
20 technology. Most participants in this study reported minor technical difficulties  
21 especially with internet connectivity and availability especially in rural areas, which  
22 limited their ability to utilize the telemonitoring device effectively. Participants also  
23 expressed concerns regarding the stability of Internet connection at their homes.  
24  
25  
26  
27  
28  
29  
30  
31  
32

33 I think depend on the situation.. whether you live in a village where it will be  
34 very difficult..... because (in) certain villages you don't have (Internet) line so  
35 you still need have (to record the blood glucose results) manually. [Patient 8,  
36 35/F]  
37  
38  
39  
40  
41  
42  
43

44 Participants suggested the need to have a robust system which is user-friendly, has  
45 good technical support which they felt was essential to ensure that the implementation  
46 of telemedicine was successful.  
47  
48  
49  
50  
51  
52

53 “Okay (lah) but what happens when there is a virus? It is a problem for one  
54 week my handphone “hang”. After one week it hang (again)....that is a problem”  
55  
56  
57  
58 [Patient 13, 54/F].  
59  
60

1  
2  
3  
4  
5 Another aspect which participants were worried of was the costs involved compared  
6 to conventional care and that telemonitoring would only be suitable for affluent  
7 patients.  
8  
9  
10  
11  
12  
13

14 All this (telemedicine) is for people who are wealthy. Of course this is a good  
15 system. [Patient 14, 63/M]  
16  
17  
18  
19  
20  
21  
22  
23  
24  
25  
26  
27  
28  
29  
30  
31  
32  
33  
34  
35  
36  
37  
38  
39  
40  
41  
42  
43  
44  
45  
46  
47  
48  
49  
50  
51  
52  
53  
54  
55  
56  
57  
58  
59  
60

## Discussion

In our study, we present the conditions for the success of a telemonitoring health device for managing type 2 diabetes, from patients' perspective. We identified a set of distinctive but interrelated conditions which are central to the success of such programs. Firstly, participants' demographics played a crucial factor in ensuring the acceptability of telemedicine. We noted that younger participants between the ages of 29 to 50 years old preferred using a web-based glucometer compared to older participants who preferred recording their results manually. Such outcome is not surprising as young individuals who grew up in this digital era were usually more technologically savvy compared to their older counterparts.<sup>26 27</sup> Participants cited various reasons for being unable to use a web-based glucometer, including the lack of Internet connection especially in the rural areas. Indeed, concerns about the stability of Internet connection was the biggest barrier in using telemedicine in diabetes care in this study. The need for a simple, user friendly technology was also consistently highlighted, to encourage acceptability among participants to use a remote telemonitoring system.

As telemedicine technology is improving continuously, participants expressed enthusiasm on the potential added value of telemedicine. Most participants were willing to incorporate technology as part of their diabetes management, but expressed the need to have sufficient training and on-going support, especially when they encountered issues such as equipment limitations. Our study also identified the potential benefits which fueled participants' enthusiasm towards telemedicine. These include receiving alerts, being able to respond to SMBG readings with advice from a health care professional; as well as reducing opportunity cost incurred when using

1  
2  
3 telemedicine.<sup>28</sup> Our study also offers an additional perspective and insight into the  
4 importance of patient-provider relationship. Our results support previous research  
5 which indicated that personal interaction with a health care practitioner was an  
6 important aspect to support type 2 diabetes patients, especially when it involves  
7 SMBG.<sup>29</sup> This view was also expressed by most participants in the present study, and  
8 also that a lack of emotional support especially when communicating through remote  
9 telemonitoring resulted in participants dropping out of the study.<sup>13</sup>

10  
11  
12  
13  
14  
15  
16  
17  
18  
19  
20  
21 Our study also noted that not all participant perceive enhanced SMBG as a positive  
22 tool to help achieve good glycaemic control. Some participants in this study expressed  
23 reservation on the feedback and monitoring feature, which they felt intruded into their  
24 personal space. They also expressed some tension between achieving good  
25 glycaemic control and quality of life, especially with the involvement of health care  
26 providers and family members whom they felt were acting as a “police”. As a results,  
27 some of these patients opted not to take part in the randomized controlled trial, for fear  
28 that this could further amplify the tension and strain the relationship, an outcome which  
29 they definitely did not want. Findings of this study identified several issues which are  
30 salient in the literature. For example, our study like many others noted that patients  
31 were acceptable to telemedicine due to its ability to reduce travel time, increase self-  
32 awareness and access to care. However, our study also found several additional  
33 barriers that have never been reported in literature, such as the tensions between  
34 operational practicality versus patient’s privacy and health security.  
35  
36  
37  
38  
39  
40  
41  
42  
43  
44  
45  
46  
47  
48  
49  
50  
51  
52  
53  
54  
55  
56  
57  
58  
59  
60



1  
2  
3 Our study offers several strength. By exploring the insights of patients, we illustrate  
4 how family values and technology literacy could influence participants' opinion on  
5 telemonitoring. Our study was also culturally specific to an Asian context and thus, we  
6 could gain an in-depth understanding and broader views of participants' behaviors  
7 when managing diabetes. There were some limitations to our study. Firstly, although  
8 we had included a diverse sample of participants and reached thematic saturation in  
9 our focus groups and in-depth interviews, these participants were only limited to one  
10 geographical location in Malaysia. Participants in this current study were recruited  
11 from suburban districts in Selangor where connectivity and technology literacy were  
12 moderate. Future studies should include patients from both urban as well as rural  
13 location and those with high technology literacy, as this could potentially influence the  
14 uptake and acceptability of telemedicine. While published literature suggest that these  
15 trends are likely to be transferable to other regions in Malaysia, the context may differ  
16 in other countries and settings. The views expressed here are solely from a patients'  
17 point and does not represent the views of health care providers or policy makers.  
18 Finally, our results cannot draw definitive conclusion regarding differences in provider  
19 practices, patient knowledge as well as attitudes from different clinic sites other than  
20 those examined in this study.  
21  
22  
23  
24  
25  
26  
27  
28  
29  
30  
31  
32  
33  
34  
35  
36  
37  
38  
39  
40  
41  
42  
43  
44  
45  
46  
47  
48

### 49 **Implications for practice**

50  
51 The continual improvements in technology will facilitate the use of telemedicine in  
52 future. The largest implication will be its ability to reduce logistical barriers and time  
53 saving potential. However, it is important that any telemedicine programs consider  
54 the economic standing of patients, especially those living in rural areas, who may  
55  
56  
57  
58  
59  
60

1  
2  
3 have limited internet connectivity. As such, health care professionals and policy  
4  
5 makers need to take into consideration these aspects prior to introducing any  
6  
7 telemedicine technology for their patients to ensure that patients' expectations are  
8  
9 met. Another theme that emerged from this interview was the need to invest in  
10  
11 capacity building especially in human resources. Specifically, the creation of training  
12  
13 programs for both public as well as health workers are particularly important,  
14  
15 especially among the non-IT savvy groups.  
16  
17  
18  
19  
20  
21  
22  
23  
24  
25  
26  
27  
28  
29  
30  
31  
32  
33  
34  
35  
36  
37  
38  
39  
40  
41  
42  
43  
44  
45  
46  
47  
48  
49  
50  
51  
52  
53  
54  
55  
56  
57  
58  
59  
60

## Conclusion

In conclusion, findings from this study indicate that the implementation of telemonitoring requires strategic planning with inputs from various stakeholders including, educators, health care providers, telco service providers and patients. These need to take into consideration the patient's personal and contextual factors, which could have a positive or negative effect. As such, health care providers need to discuss patients' perspective to ensure the optimal use of telemedicine to improve patients' clinical parameters and quality of life.

## Acknowledgements

The authors would like to thank all participants and health providers who contributed their time to share their perspectives with us. We also wish to thank Drs Chirk Jenn Ng and Chee Piau Wong for helping to edit the article.

## Funding source

This study was supported by the e-Science fund from the Ministry of Science, Technology and Innovation, Malaysia [03-02-10-SF0238 (MOSTI)], Telemedicine Cluster, Tropical Medicine and Biology platform, Monash University Malaysia (52140757-314-00) and SEGi University Research Fund (SEGi/2013/SKK/04/1).

## Author Disclosure Statement

The authors report no conflict of interests.

## Author Contributions

All authors named contributed substantially to the document. JYL conducted and transcribed the interview, interpreted the results and wrote the draft manuscript. SWHL obtained the funding, designed the study and provided support in editing the manuscript. CKYC, SSC, , TP, KKCL, NHN and CSST contributed to the study design and critical review of the manuscript. All authors approved the final version.

## Data sharing statement

All data generated or analysed during this study are included in this published article. They can be made available from the corresponding author on reasonable request.

## References

1. Ogurtsova K, da Rocha Fernandes JD, Huang Y, et al. IDF Diabetes Atlas: Global estimates for the prevalence of diabetes for 2015 and 2040. *Diabetes Research and Clinical Practice* 2017;128:40-50. doi: 10.1016/j.diabres.2017.03.024
2. International Diabetes Federation. IDF Diabetes Atlas. 8th ed. Brussels, Belgium: International Diabetes Federation 2017.
3. American Diabetes Association. 5. Glycemic Targets. *Diabetes Care* 2016;39(Supplement 1):S39-S46. doi: 10.2337/dc16-S008
4. Farmer AJ, Perera R, Ward A, et al. Meta-analysis of individual patient data in randomised trials of self monitoring of blood glucose in people with non-insulin treated type 2 diabetes. *BMJ* 2012;344 doi: 10.1136/bmj.e486
5. Malanda UL, Welschen LMC, Riphagen II, et al. Self-monitoring of blood glucose in patients with type 2 diabetes mellitus who are not using insulin. *Cochrane Database of Systematic Reviews* 2012(1) doi: 10.1002/14651858.CD005060.pub3
6. Zhu H, Zhu Y, Leung S-w. Is self-monitoring of blood glucose effective in improving glycaemic control in type 2 diabetes without insulin treatment: a meta-analysis of randomised controlled trials. *BMJ Open* 2016;6(9):e010524. doi: 10.1136/bmjopen-2015-010524
7. Cox DJ, Gonder-Frederick L, Ritterband L, et al. Prediction of Severe Hypoglycemia. *Diabetes Care* 2007;30(6):1370. doi: 10.2337/dc06-1386
8. Malanda UL, Bot SD, Nijpels G. Self-monitoring of blood glucose in noninsulin-using type 2 diabetic patients. *Diabetes Care* 2013;36(1):176. doi: 10.2337/dc12-0831

- 1  
2  
3 9. Lee SWH, Ooi L, Lai YK. Telemedicine for the Management of Glycemic Control and Clinical  
4  
5 Outcomes of Type 1 Diabetes Mellitus: A Systematic Review and Meta-Analysis of  
6  
7 Randomized Controlled Studies. *Frontiers in Pharmacology* 2017;8:330. doi:  
8  
9 10.3389/fphar.2017.00330  
10  
11  
12
- 13 10. Polonsky WH, Fisher L, Schikman CH, et al. Structured self-monitoring of blood glucose  
14  
15 significantly reduces A1C levels in poorly controlled, noninsulin-treated type 2  
16  
17 diabetes: Results from the structured testing program study. *Diabetes Care*  
18  
19 2011;34(2):262-67. doi: 10.2337/dc10-1732  
20  
21  
22
- 23 11. Fisher L, Polonsky WH, Parkin CG, et al. The impact of structured blood glucose testing  
24  
25 on attitudes toward self-management among poorly controlled, insulin-naive  
26  
27 patients with type 2 diabetes. *Diabetes Research and Clinical Practice*  
28  
29 2012;96(2):149-55. doi: 10.1016/j.diabres.2011.12.016  
30  
31  
32
- 33 12. Lee JY, Lee SWH, Nasir NH, et al. Diabetes telemonitoring reduces the risk of  
34  
35 hypoglycaemia during Ramadan: a pilot randomized controlled study. *Diabetic*  
36  
37 *Medicine* 2015;32(12):1658-61. doi: 10.1111/dme.12836  
38  
39
- 40 13. Lee JY, Wong CP, Tan CSS, et al. Telemonitoring in fasting individuals with Type 2  
41  
42 Diabetes Mellitus during Ramadan: A prospective, randomised controlled study.  
43  
44 *Scientific Reports* 2017;7(1):10119. doi: 10.1038/s41598-017-10564-y  
45  
46
- 47 14. Lee SWH, Lee JY, San San Tan C, et al. Strategies to make Ramadan fasting safer in type 2  
48  
49 diabetics: a systematic review and network meta-analysis of randomized controlled  
50  
51 trials and observational studies. *Medicine* 2016;95(2)  
52  
53
- 54 15. Paré G, Jaana M, Sicotte C. Systematic Review of Home Telemonitoring for Chronic  
55  
56 Diseases: The Evidence Base. *Journal of the American Medical Informatics*  
57  
58 *Association : JAMIA* 2007;14(3):269-77. doi: 10.1197/jamia.M2270  
59  
60

- 1  
2  
3 16. Pare G, Moqadem K, Pineau G, et al. Clinical effects of home telemonitoring in the  
4 context of diabetes, asthma, heart failure and hypertension: a systematic review. *J*  
5  
6 context of diabetes, asthma, heart failure and hypertension: a systematic review. *J*  
7  
8 *Med Internet Res* 2010;12(2):e21. doi: 10.2196/jmir.1357 [published Online First:  
9  
10 2010/06/18]  
11  
12  
13 17. Hernandez C, Casas A, Escarrabill J, et al. Home hospitalisation of exacerbated chronic  
14  
15 obstructive pulmonary disease patients. *European Respiratory Journal* 2003;21(1):58.  
16  
17 doi: 10.1183/09031936.03.00015603  
18  
19  
20 18. Lee SWH, Chan CKY, Chua SS, et al. Comparative effectiveness of telemedicine strategies  
21  
22 on type 2 diabetes management: A systematic review and network meta-analysis.  
23  
24 *Scientific Reports* 2017;7(1):12680. doi: 10.1038/s41598-017-12987-z  
25  
26  
27 19. Jaana M, Pare G. Home telemonitoring of patients with diabetes: A systematic  
28  
29 assessment of observed effects. *Journal of evaluation in clinical practice*  
30  
31 2007;13(2):242-53. doi: 10.1111/j.1365-2753.2006.00686.x  
32  
33  
34 20. Lee SWH, Chan CKY, Chua SS, et al. Comparative effectiveness of telemedicine strategies  
35  
36 on type 2 diabetes management: A systematic review and network meta-analysis.  
37  
38 *Scientific reports* 2017;7(1):12680. doi: 10.1038/s41598-017-12987-z [published  
39  
40 Online First: 2017/10/06]  
41  
42  
43  
44 21. Heckemann B, Wolf A, Ali L, et al. Discovering untapped relationship potential with  
45  
46 patients in telehealth: a qualitative interview study. *BMJ Open* 2016;6(3):e009750.  
47  
48 doi: 10.1136/bmjopen-2015-009750  
49  
50  
51 22. Kruse CS, Krowski N, Rodriguez B, et al. Telehealth and patient satisfaction: a systematic  
52  
53 review and narrative analysis. *BMJ Open* 2017;7(8) doi: 10.1136/bmjopen-2017-  
54  
55 016242  
56  
57  
58  
59  
60

- 1  
2  
3 23. Scott Kruse C, Karem P, Shifflett K, et al. Evaluating barriers to adopting telemedicine  
4  
5 worldwide: A systematic review. *Journal of telemedicine and telecare* 2018;24(1):4-  
6  
7 12. doi: 10.1177/1357633X16674087 [published Online First: 10/16]  
8  
9  
10 24. Lee JY, Chan CKY, Chua SS, et al. Intervention for Diabetes with Education, Advancement  
11  
12 and Support (IDEAS) study: protocol for a cluster randomised controlled trial. *BMC*  
13  
14 *Health Services Research* 2016;16(1):524. doi: 10.1186/s12913-016-1782-y  
15  
16  
17 25. Nowell LS, Norris JM, White DE, et al. Thematic Analysis: Striving to Meet the  
18  
19 Trustworthiness Criteria. *International Journal of Qualitative Methods*  
20  
21 2017;16(1):1609406917733847. doi: 10.1177/1609406917733847  
22  
23  
24 26. Zailani S, Gilani MS, Nikbin D, et al. Determinants of Telemedicine Acceptance in  
25  
26 Selected Public Hospitals in Malaysia: Clinical Perspective. *Journal of Medical Systems*  
27  
28 2014;38(9):111. doi: 10.1007/s10916-014-0111-4  
29  
30  
31 27. Georgsson M, Staggers N. Quantifying usability: an evaluation of a diabetes mHealth  
32  
33 system on effectiveness, efficiency, and satisfaction metrics with associated user  
34  
35 characteristics. *Journal of the American Medical Informatics Association*  
36  
37 2016;23(1):5-11. doi: 10.1093/jamia/ocv099  
38  
39  
40 28. Lee JY, Lee SWH. Is telemedicine cost effectiveness for diabetes management: A  
41  
42 systematic review. *Diabetes technology & therapeutics* 2018;20(7):492-500.  
43  
44  
45 29. Heisler M, Bouknight RR, Hayward RA, et al. The relative importance of physician  
46  
47 communication, participatory decision making, and patient understanding in  
48  
49 diabetes self-management. *Journal of general internal medicine* 2002;17(4):243-52.  
50  
51  
52  
53  
54  
55  
56  
57  
58  
59  
60



**Table 1: The interview guide topic areas and key questions**

| Topic area   | Key questions used in interviews                                                                                                                                                                                                                                                                                                                                                                                                                                               |
|--------------|--------------------------------------------------------------------------------------------------------------------------------------------------------------------------------------------------------------------------------------------------------------------------------------------------------------------------------------------------------------------------------------------------------------------------------------------------------------------------------|
| Diabetes     | <ul style="list-style-type: none"> <li>• How would you describe your experience so far with diabetes?</li> <li>• How have you been coping with diabetes so far? Describe some of the ways you have been coping</li> <li>• Who and how much support do you have to cope with your conditions now</li> <li>• What are some of the most important treatment needs for a patient with diabetes</li> </ul>                                                                          |
| Telemedicine | <ul style="list-style-type: none"> <li>• Describe and tell us your experience with using the web-enabled glucometer so far.</li> <li>• How do you think the system was able to affect your diabetes management?</li> <li>• How do you think other will accept this system?</li> <li>• What would you think are some areas where the system was good and where are the areas we can improve?</li> <li>• What do you think about using this system for the long term?</li> </ul> |

1  
2  
3  
4  
5  
6  
7  
8  
9  
10  
11  
12  
13  
14  
15  
16  
17  
18  
19  
20  
21  
22  
23  
24  
25  
26  
27  
28  
29  
30  
31  
32  
33  
34  
35  
36  
37  
38  
39  
40  
41  
42  
43  
44  
45  
46  
47  
48  
49  
50  
51  
52  
53  
54  
55  
56  
57  
58  
59  
60

|  |                                                                                                                                                                                                              |
|--|--------------------------------------------------------------------------------------------------------------------------------------------------------------------------------------------------------------|
|  | <ul style="list-style-type: none"><li>• What would be some of your concerns (if any) if this was to be used?</li><li>• How was your interaction with your healthcare professional with the device?</li></ul> |
|--|--------------------------------------------------------------------------------------------------------------------------------------------------------------------------------------------------------------|

For peer review only

**Table 2: Baseline demographics of participants who participated in the focus group**

| Patients (n= 48)                            | Men (n = 21) | Women (n = 27) |
|---------------------------------------------|--------------|----------------|
| Age (years)                                 | 54.19        | 50.15          |
| Range                                       | 29-62        | 31-69          |
| Duration of diabetes (years)                | 4.06         | 6.88           |
| Range                                       | 0.83-24      | 0.5-15         |
| No of oral hypoglycaemic agents used, n (%) |              |                |
| 1-2                                         | 18 (85)      | 27 (100)       |
| ≥3                                          | 1 (4)        | 0 (0)          |
| No of antihypertension drugs used, n (%)    |              |                |
| 1-2                                         | 9 (42)       | 11 (40)        |
| ≥3                                          | 3 (14)       | 7 (25)         |
| Insulin use, n (%)                          |              |                |
| Yes                                         | 4 (19)       | 2 (7)          |
| No                                          | 17 (81)      | 25 (93)        |

Data are expressed as mean, unless otherwise stated.

**Box 1: IDEAS study**

The Intervention for Diabetes with Education, Advancement and Support (IDEAS) study is a cluster randomized controlled study to evaluate the use of telemedicine to improve diabetes care. Participants in the telemedicine group were instructed to measure their blood glucose at least twice weekly (one fasting and one non-fasting) or more frequent as recommended by physician. These blood glucose readings will be transmitted via a Bluetooth technology to the participants' mobile phone to a remote secure server. Participants and their physicians were able to access the records on the server. Advice on lifestyle modification, any potential changes in medication, who and how to contact their healthcare providers were also given monthly during the study. A researcher also checked participants' results weekly and initiate intervention if needed (e.g. medication changes, counselling) with the consent of the attending physician.

## Standards for Reporting Qualitative Research (SRQR)\*

<http://www.equator-network.org/reporting-guidelines/srqr/>

Page/line no(s).

### Title and abstract

|                                                                                                                                                                                                                                                              |   |
|--------------------------------------------------------------------------------------------------------------------------------------------------------------------------------------------------------------------------------------------------------------|---|
| <p><b>Title</b> - Concise description of the nature and topic of the study Identifying the study as qualitative or indicating the approach (e.g., ethnography, grounded theory) or data collection methods (e.g., interview, focus group) is recommended</p> | 1 |
| <p><b>Abstract</b> - Summary of key elements of the study using the abstract format of the intended publication; typically includes background, purpose, methods, results, and conclusions</p>                                                               | 3 |

### Introduction

|                                                                                                                                                                     |     |
|---------------------------------------------------------------------------------------------------------------------------------------------------------------------|-----|
| <p><b>Problem formulation</b> - Description and significance of the problem/phenomenon studied; review of relevant theory and empirical work; problem statement</p> | 6-7 |
| <p><b>Purpose or research question</b> - Purpose of the study and specific objectives or questions</p>                                                              | 7   |

### Methods

|                                                                                                                                                                                                                                                                                                                                                                                                             |     |
|-------------------------------------------------------------------------------------------------------------------------------------------------------------------------------------------------------------------------------------------------------------------------------------------------------------------------------------------------------------------------------------------------------------|-----|
| <p><b>Qualitative approach and research paradigm</b> - Qualitative approach (e.g., ethnography, grounded theory, case study, phenomenology, narrative research) and guiding theory if appropriate; identifying the research paradigm (e.g., postpositivist, constructivist/ interpretivist) is also recommended; rationale**</p>                                                                            | 9   |
| <p><b>Researcher characteristics and reflexivity</b> - Researchers' characteristics that may influence the research, including personal attributes, qualifications/experience, relationship with participants, assumptions, and/or presuppositions; potential or actual interaction between researchers' characteristics and the research questions, approach, methods, results, and/or transferability</p> | 9   |
| <p><b>Context</b> - Setting/site and salient contextual factors; rationale**</p>                                                                                                                                                                                                                                                                                                                            | 8   |
| <p><b>Sampling strategy</b> - How and why research participants, documents, or events were selected; criteria for deciding when no further sampling was necessary (e.g., sampling saturation); rationale**</p>                                                                                                                                                                                              | 8   |
| <p><b>Ethical issues pertaining to human subjects</b> - Documentation of approval by an appropriate ethics review board and participant consent, or explanation for lack thereof; other confidentiality and data security issues</p>                                                                                                                                                                        | 10  |
| <p><b>Data collection methods</b> - Types of data collected; details of data collection procedures including (as appropriate) start and stop dates of data collection and analysis, iterative process, triangulation of sources/methods, and modification of procedures in response to evolving study findings; rationale**</p>                                                                             | 8-9 |

|                       |                                                                                                                                                                                                                                                       |             |
|-----------------------|-------------------------------------------------------------------------------------------------------------------------------------------------------------------------------------------------------------------------------------------------------|-------------|
| 1<br>2<br>3<br>4<br>5 | <b>Data collection instruments and technologies</b> - Description of instruments (e.g., interview guides, questionnaires) and devices (e.g., audio recorders) used for data collection; if/how the instrument(s) changed over the course of the study | 9 & Table 1 |
| 6<br>7<br>8           | <b>Units of study</b> - Number and relevant characteristics of participants, documents, or events included in the study; level of participation (could be reported in results)                                                                        | 11          |
| 9<br>10<br>11<br>12   | <b>Data processing</b> - Methods for processing data prior to and during analysis, including transcription, data entry, data management and security, verification of data integrity, data coding, and anonymization/de-identification of excerpts    | 9           |
| 13<br>14<br>15<br>16  | <b>Data analysis</b> - Process by which inferences, themes, etc., were identified and developed, including the researchers involved in data analysis; usually references a specific paradigm or approach; rationale**                                 | 9-10        |
| 17<br>18<br>19<br>20  | <b>Techniques to enhance trustworthiness</b> - Techniques to enhance trustworthiness and credibility of data analysis (e.g., member checking, audit trail, triangulation); rationale**                                                                | 10          |

### Results/findings

|                      |                                                                                                                                                                                                   |       |
|----------------------|---------------------------------------------------------------------------------------------------------------------------------------------------------------------------------------------------|-------|
| 23<br>24<br>25<br>26 | <b>Synthesis and interpretation</b> - Main findings (e.g., interpretations, inferences, and themes); might include development of a theory or model, or integration with prior research or theory | 11-17 |
| 27<br>28<br>29       | <b>Links to empirical data</b> - Evidence (e.g., quotes, field notes, text excerpts, photographs) to substantiate analytic findings                                                               | 11-17 |

### Discussion

|                                  |                                                                                                                                                                                                                                                                                                                                                                                                             |       |
|----------------------------------|-------------------------------------------------------------------------------------------------------------------------------------------------------------------------------------------------------------------------------------------------------------------------------------------------------------------------------------------------------------------------------------------------------------|-------|
| 32<br>33<br>34<br>35<br>36<br>37 | <b>Integration with prior work, implications, transferability, and contribution(s) to the field</b> - Short summary of main findings; explanation of how findings and conclusions connect to, support, elaborate on, or challenge conclusions of earlier scholarship; discussion of scope of application/generalizability; identification of unique contribution(s) to scholarship in a discipline or field | 18-20 |
| 38<br>39                         | <b>Limitations</b> - Trustworthiness and limitations of findings                                                                                                                                                                                                                                                                                                                                            | 21    |

### Other

|                |                                                                                                                                               |    |
|----------------|-----------------------------------------------------------------------------------------------------------------------------------------------|----|
| 42<br>43<br>44 | <b>Conflicts of interest</b> - Potential sources of influence or perceived influence on study conduct and conclusions; how these were managed | 22 |
| 45<br>46       | <b>Funding</b> - Sources of funding and other support; role of funders in data collection, interpretation, and reporting                      | 23 |

\*The authors created the SRQR by searching the literature to identify guidelines, reporting standards, and critical appraisal criteria for qualitative research; reviewing the reference lists of retrieved sources; and contacting experts to gain feedback. The SRQR aims to improve the transparency of all aspects of qualitative research by providing clear standards for reporting qualitative research.

1  
2  
3  
4  
5  
6  
7  
8  
9  
10  
11  
12  
13  
14  
15  
16  
17  
18  
19  
20  
21  
22  
23  
24  
25  
26  
27  
28  
29  
30  
31  
32  
33  
34  
35  
36  
37  
38  
39  
40  
41  
42  
43  
44  
45  
46  
47  
48  
49  
50  
51  
52  
53  
54  
55  
56  
57  
58  
59  
60

\*\*The rationale should briefly discuss the justification for choosing that theory, approach, method, or technique rather than other options available, the assumptions and limitations implicit in those choices, and how those choices influence study conclusions and transferability. As appropriate, the rationale for several items might be discussed together.

**Reference:**

O'Brien BC, Harris IB, Beckman TJ, Reed DA, Cook DA. **Standards for reporting qualitative research: a synthesis of recommendations.** *Academic Medicine*, Vol. 89, No. 9 / Sept 2014  
DOI: 10.1097/ACM.0000000000000388

For peer review only

**Manuscript:** Using telemedicine to support care for people with type 2 diabetes mellitus: A qualitative analysis of patient's perspective

## Consolidated criteria for reporting qualitative studies (COREQ): 32-item checklist

Developed from:

Tong A, Sainsbury P, Craig J. Consolidated criteria for reporting qualitative research (COREQ): a 32-item checklist for interviews and focus groups. *International Journal for Quality in Health Care*. 2007. Volume 19, Number 6: pp. 349 – 357

| No. Item                                       | Guide questions/description                                                                                                                | Reported on Page # |
|------------------------------------------------|--------------------------------------------------------------------------------------------------------------------------------------------|--------------------|
| <b>Domain 1: Research team and reflexivity</b> |                                                                                                                                            |                    |
| <i>Personal Characteristics</i>                |                                                                                                                                            |                    |
| 1. Inter viewer/facilitator                    | Which author/s conducted the inter view or focus group?                                                                                    | 9                  |
| 2. Credentials                                 | What were the researcher's credentials? E.g. PhD, MD                                                                                       | 1                  |
| 3. Occupation                                  | What was their occupation at the time of the study?                                                                                        | 1                  |
| 4. Gender                                      | Was the researcher male or female?                                                                                                         | 1                  |
| 5. Experience and training                     | What experience or training did the researcher have?                                                                                       | 9                  |
| <i>Relationship with participants</i>          |                                                                                                                                            |                    |
| 6. Relationship established                    | Was a relationship established prior to study commencement?                                                                                | 10                 |
| 7. Participant knowledge of the interviewer    | What did the participants know about the researcher? e.g. personal goals, reasons for doing the research                                   | 8                  |
| 8. Interviewer characteristics                 | What characteristics were reported about the inter viewer/facilitator? e.g. Bias, assumptions, reasons and interests in the research topic | 9                  |



| <b>Domain 2: study design</b>            |                                                                                                                                                          |         |
|------------------------------------------|----------------------------------------------------------------------------------------------------------------------------------------------------------|---------|
| <i>Theoretical framework</i>             |                                                                                                                                                          |         |
| 9. Methodological orientation and Theory | What methodological orientation was stated to underpin the study? e.g. grounded theory, discourse analysis, ethnography, phenomenology, content analysis | 9-10    |
| <i>Participant selection</i>             |                                                                                                                                                          |         |
| 10. Sampling                             | How were participants selected? e.g. purposive, convenience, consecutive, snowball                                                                       | 8       |
| 11. Method of approach                   | How were participants approached? e.g. face-to-face, telephone, mail, email                                                                              | 8-9     |
| 12. Sample size                          | How many participants were in the study?                                                                                                                 | 8       |
| 13. Non-participation                    | How many people refused to participate or dropped out? Reasons?                                                                                          | 8       |
| <i>Setting</i>                           |                                                                                                                                                          |         |
| 14. Setting of data collection           | Where was the data collected? e.g. home, clinic, workplace                                                                                               | 11      |
| 15. Presence of non-participants         | Was anyone else present besides the participants and researchers?                                                                                        | 11      |
| 16. Description of sample                | What are the important characteristics of the sample? e.g. demographic data, date                                                                        | 11      |
| <i>Data collection</i>                   |                                                                                                                                                          |         |
| 17. Interview guide                      | Were questions, prompts, guides provided by the authors? Was it pilot tested?                                                                            | Table 1 |
| 18. Repeat interviews                    | Were repeat inter views carried out? If yes, how many?                                                                                                   | No      |
| 19. Audio/visual recording               | Did the research use audio or visual recording to collect the data?                                                                                      | 9-10    |
| 20. Field notes                          | Were field notes made during and/or after the inter view or focus group?                                                                                 | No      |
| 21. Duration                             | What was the duration of the inter views or focus group?                                                                                                 | 9       |

|                                        |                                                                                                                                 |                                               |
|----------------------------------------|---------------------------------------------------------------------------------------------------------------------------------|-----------------------------------------------|
| 22. Data saturation                    | Was data saturation discussed?                                                                                                  | 9                                             |
| 23. Transcripts returned               | Were transcripts returned to participants for comment and/or correction?                                                        | No                                            |
| <b>Domain 3: analysis and findings</b> |                                                                                                                                 |                                               |
| <i>Data analysis</i>                   |                                                                                                                                 |                                               |
| 24. Number of data coders              | How many data coders coded the data?                                                                                            | 10                                            |
| 25. Description of the coding tree     | Did authors provide a description of the coding tree?                                                                           | 10                                            |
| 26. Derivation of themes               | Were themes identified in advance or derived from the data?                                                                     | No                                            |
| 27. Software                           | What software, if applicable, was used to manage the data?                                                                      | 9                                             |
| 28. Participant checking               | Did participants provide feedback on the findings?                                                                              | 10                                            |
| <i>Reporting</i>                       |                                                                                                                                 |                                               |
| 29. Quotations presented               | Were participant quotations presented to illustrate the themes/findings? Was each quotation identified? e.g. participant number | Yes. 11-17                                    |
| 30. Data and findings consistent       | Was there consistency between the data presented and the findings?                                                              | 18-20                                         |
| 31. Clarity of major themes            | Were major themes clearly presented in the findings?                                                                            | Yes. they were.<br>11-20                      |
| 32. Clarity of minor themes            | Is there a description of diverse cases or discussion of minor themes?                                                          | Discussion of major and minor themes<br>18-20 |

# BMJ Open

## Using telemedicine to support care for people with type 2 diabetes mellitus: A qualitative analysis of patient's perspective

|                                 |                                                                                                                                                                                                                                                                                                                                                                                                                                                                                                                                                                                                                                                                                                  |
|---------------------------------|--------------------------------------------------------------------------------------------------------------------------------------------------------------------------------------------------------------------------------------------------------------------------------------------------------------------------------------------------------------------------------------------------------------------------------------------------------------------------------------------------------------------------------------------------------------------------------------------------------------------------------------------------------------------------------------------------|
| Journal:                        | <i>BMJ Open</i>                                                                                                                                                                                                                                                                                                                                                                                                                                                                                                                                                                                                                                                                                  |
| Manuscript ID                   | bmjopen-2018-026575.R2                                                                                                                                                                                                                                                                                                                                                                                                                                                                                                                                                                                                                                                                           |
| Article Type:                   | Original research                                                                                                                                                                                                                                                                                                                                                                                                                                                                                                                                                                                                                                                                                |
| Date Submitted by the Author:   | 25-Jun-2019                                                                                                                                                                                                                                                                                                                                                                                                                                                                                                                                                                                                                                                                                      |
| Complete List of Authors:       | Lee, Jun Yang; Monash University - Malaysia Campus, School of Pharmacy; SEGi University Kota Damansara<br>Chan, Carina; La Trobe University College of Science Health and Engineering<br>Chua, Siew Siang; Taylor's University - Lakeside Campus, School of Pharmacy<br>Paraidathathu, Thomas; Taylor's University - Lakeside Campus, School of Pharmacy<br>Lee, Kenneth Kwing-Chin; Monash University - Malaysia Campus, School of Pharmacy<br>Tan, Christina; HELP International Corporation Bhd<br>Nasir, Nazrila; Kementerian Kesihatan Malaysia<br>Lee, Shaun Wen Huey ; Monash University - Malaysia Campus, School of Pharmacy; Taylor's University - Lakeside Campus, School of Pharmacy |
| <b>Primary Subject Heading</b>: | Diabetes and endocrinology                                                                                                                                                                                                                                                                                                                                                                                                                                                                                                                                                                                                                                                                       |
| Secondary Subject Heading:      | Health informatics, Health services research, Patient-centred medicine, Qualitative research                                                                                                                                                                                                                                                                                                                                                                                                                                                                                                                                                                                                     |
| Keywords:                       | General diabetes < DIABETES & ENDOCRINOLOGY, QUALITATIVE RESEARCH, Telemedicine < BIOTECHNOLOGY & BIOINFORMATICS                                                                                                                                                                                                                                                                                                                                                                                                                                                                                                                                                                                 |
|                                 |                                                                                                                                                                                                                                                                                                                                                                                                                                                                                                                                                                                                                                                                                                  |

SCHOLARONE™  
Manuscripts

1  
2  
3  
4  
5 **Using telemedicine to support care for people with type 2 diabetes mellitus: A**  
6  
7 **qualitative analysis of patient's perspective**  
8  
9

10  
11  
12 Short running title: Patient's perspective of telemedicine  
13  
14

15  
16 <sup>1</sup>Jun Yang LEE <sup>2</sup>Carina Ka Yee CHAN, <sup>3</sup>Siew Siang CHUA, <sup>3</sup>Thomas  
17  
18 PARAIIDATHATHU, <sup>1</sup>Kenneth Kwing-Chin LEE, <sup>4</sup>Christina San San TAN, <sup>5</sup>Nazrila  
19  
20 NASIR, <sup>1,3,6</sup>Shaun Wen Huey LEE  
21  
22

23  
24  
25  
26 <sup>1</sup>School of Pharmacy, Monash University Malaysia, Jalan Lagoon Selatan, Bandar  
27  
28 Sunway, 47500, Subang Jaya, Selangor, Malaysia.

29  
30 <sup>2</sup> School of Psychology and Public Health, College of Science, Health and  
31  
32 Engineering, La Trobe University, Australia.

33  
34  
35 <sup>3</sup>School of Pharmacy, Faculty of Health and Medical Sciences, Taylor's University,  
36  
37 47500 Subang Jaya, Selangor, Malaysia.

38  
39  
40 <sup>4</sup>Centre for Pre-University Studies, HELP College of Arts and Technology, Kuala  
41  
42 Lumpur, Malaysia.

43  
44 <sup>5</sup>Klinik Kesihatan Putrajaya, Putrajaya, Malaysia.

45  
46 <sup>6</sup>Asian Centre for Evidence Synthesis in Population, Implementation and Clinical  
47  
48 Outcomes (PICO), Health and Well-being Cluster, Global Asia in the 21st Century  
49  
50 (GA21) Platform, Monash University Malaysia, Bandar Sunway, Selangor Malaysia  
51  
52

53  
54  
55 *Corresponding author and person in who reprint request should be addressed to*

56  
57  
58 Shaun Lee Wen Huey  
59  
60

1  
2  
3 School of Pharmacy  
4

5 Monash University Malaysia  
6

7 Jalan Lagoon Selatan,  
8

9  
10 47500 Bandar Sunway,  
11

12 Selangor Darul Ehsan,  
13

14 Malaysia.  
15

16 Telephone: +60 3 5514 5890  
17

18 Fax: +60 3 5514 6364  
19

20 Email: [shaun.lee@monash.edu](mailto:shaun.lee@monash.edu)  
21  
22

23  
24  
25  
26 Keywords: telemedicine; qualitative; patient perspective; barriers; diabetes  
27

28  
29  
30 Word count: 3,785 words  
31  
32  
33  
34  
35  
36  
37  
38  
39  
40  
41  
42  
43  
44  
45  
46  
47  
48  
49  
50  
51  
52  
53  
54  
55  
56  
57  
58  
59  
60

## Abstract

**Objective:** Telemedicine has been promoted as an economical and effective way to enhance patient care but its acceptability among patients in low and middle income countries is poorly understood. This study aims to explore the experiences and perspectives of people with type 2 diabetes mellitus who used telemedicine to manage their condition.

**Design:** We conducted in-depth and focus group interviews with participants who used telemedicine. Questions included participants' perception on program use, satisfaction as well as engagement with the telemedicine program. All interviews and focus groups were audio-recorded and transcribed verbatim. Data were analyzed using a thematic approach.

**Participants and setting:** People with type 2 diabetes (n=48) who participated in a randomized controlled study which examined the using telemedicine for diabetes management.

**Results:** Twelve focus groups and two in-depth interviews were conducted. Four themes emerged from the analysis: (1) Generational difference (2) Independence and convenience, (3) Sharing of health data and privacy; and (4) Concerns and challenges. The main barriers to using telemedicine were related to the user friendliness of the devices as well as internet connectivity. Cost was also another significant concern raised by participants. However, participants were generally positive about the benefits of telemedicine, including its ability to provide real time data and disease monitoring and the reduction in clinic visits.

**Conclusion:** Despite the potential positive benefits of using telemedicine for diabetes care, several barriers could inhibit the sustained and effective use of this technology.

1  
2  
3 As such, collaboration between educators, health care providers, telecommunication  
4 service providers and patients is required to stimulate telemedicine adoption and use.  
5  
6  
7  
8  
9  
10  
11  
12  
13  
14  
15  
16  
17  
18  
19  
20  
21  
22  
23  
24  
25  
26  
27  
28  
29  
30  
31  
32  
33  
34  
35  
36  
37  
38  
39  
40  
41  
42  
43  
44  
45  
46  
47  
48  
49  
50  
51  
52  
53  
54  
55  
56  
57  
58  
59  
60

For peer review only

## Strengths and limitations of this study

- Article followed the Standards for reporting qualitative Research (SRQR) recommendations on reporting
- Focus group discussion allowed the exchange of opinions about telemedicine, leading to richer information
- View and experiences of using telemedicine from patients only were captured rather than that of healthcare providers
- The study was conducted in an urban setting in Malaysia and its applicability and transferability to other population remain unknown.



## Introduction

Diabetes is a major health concern worldwide, and according to a recent report by the International Diabetes Federation, the global prevalence of diabetes will increase from 415 million in 2015 to 642 million in 2040.<sup>1</sup> The prevalence varies considerably between different regions, but the epicenter of the diabetes crisis is currently located in the Western Pacific and South-East Asia region, with 159 million and 82 million individuals with diabetes respectively.<sup>2</sup> In many individuals with diabetes, self-monitoring of blood glucose (SMBG) is considered as a key component of treatment, and widely recommended by clinical practice guidelines, irrespective of treatment strategy.<sup>3-7</sup> SMBG is often used as an early warning sign for detecting hypoglycaemia, for improving the recognition of severe hyperglycaemia, to encourage physical activities as well as improve diet control. These data are also often used by the treating physicians to facilitate an individualized treatment regimen.

Despite these potential benefits, there is controversy on the efficacy of SMBG, especially in non-insulin dependent type 2 diabetes, due to its cost, uncertainty on frequency of testing as well as impact on patients' general health and well-being.<sup>8-10</sup> Studies have shown that the use of enhanced SMBG (where there are high levels of engagement between patients and clinicians to interpret the SMBG values) resulted in larger reduction in HbA1c compared to regular SMBG.<sup>4 11-13</sup>

The application of telemedicine, or technology to deliver various aspects of health information, prevention, monitoring and medical care in diabetes management has been suggested as an innovative solution to improve diabetes care.<sup>14-16</sup> Increasingly,

1  
2  
3 telemedicine is being viewed as a promising technology in assisting patients to  
4 manage their diabetes,<sup>15 17 18</sup> as it produces accurate and reliable data<sup>19</sup>, empowers  
5 patients<sup>14</sup>, improves glycaemic control and influences their attitude and behaviours<sup>18</sup>  
6  
7  
8  
9  
10  
11  
12  
13  
14  
15  
16  
17  
18  
19  
20  
21  
22  
23  
24  
25  
26  
27  
28  
29  
30  
31  
32  
33  
34  
35  
36  
37  
38  
39  
40  
41  
42  
43  
44  
45  
46  
47  
48  
49  
50  
51  
52  
53  
54  
55  
56  
57  
58  
59  
60

telemedicine is being viewed as a promising technology in assisting patients to manage their diabetes,<sup>15 17 18</sup> as it produces accurate and reliable data<sup>19</sup>, empowers patients<sup>14</sup>, improves glycaemic control and influences their attitude and behaviours<sup>18</sup><sup>20</sup>, potentially leading to a better quality of life.<sup>21</sup> Additionally, telemedicine has the potential to reduce the barrier to adherence of self-management through real-time data transfer between patient and provider, the review of blood glucose measurement trends, and a reduction in opportunity costs. These telemedicine services can be categorized to either synchronous (real-time), asynchronous (whereby data is stored and forwarded subsequently) and continuous (remote monitoring). In diabetes care, various forms of telemedicine services have been examined and include using mobile phones, texting, emails, e-health portals, videoconferencing as well as remote monitoring devices.

33  
34  
35  
36  
37  
38  
39  
40  
41  
42  
43  
44  
45  
46  
47  
48  
49  
50  
51  
52  
53  
54  
55  
56  
57  
58  
59  
60

However, implementation of a telemedicine service in conventional care is a complex process. Studies have shown that while telemedicine can expand the boundaries of care to a larger population and offers person-centred care,<sup>22</sup> there are examples of patients' resistance to change.<sup>23 24</sup> Nevertheless, one of the major limitations of existing literature is the lack of studies which have examined the perspective of patients from a low and middle income country, where telemedicine is now increasingly being used. Earlier work on this topic have mostly focused on the views of physicians and fewer studies have at looked the patient's perspective.<sup>25 26</sup> In most of these studies, there was limited understanding on the drivers and barriers that were faced by patients using telemedicine; and have mostly focused on the telemedicine technology as well as utilization rates of telemedicine.<sup>24 27</sup> Furthermore, very little is known as to how empirically supported interventions can be transferred or

1  
2  
3 implemented in resource-constraint countries, i.e., in most developing countries.  
4  
5 Understanding the behaviors among various levels of stakeholders is an important  
6  
7 component of successful implementation research.<sup>28</sup>  
8  
9  
10  
11  
12  
13

14 As patients' experience with telemedicine may be one of the reasons that will  
15  
16 determine the success or failure of any intervention, we conducted a qualitative study  
17  
18 to explore patients' views and experiences of telemedicine for diabetes management  
19  
20 in Malaysia. The study focused on the end users' perspective in context which were  
21  
22 necessary to ensure the successful delivery and implementation of a telemedicine  
23  
24 program for diabetes.  
25  
26  
27  
28  
29  
30  
31  
32  
33  
34  
35  
36  
37  
38  
39  
40  
41  
42  
43  
44  
45  
46  
47  
48  
49  
50  
51  
52  
53  
54  
55  
56  
57  
58  
59  
60

## Materials and Methods

### Study design

The present qualitative study was part of a larger multi-centre cluster randomized controlled study, (IDEAS) conducted between April 2015 to June 2017, which aimed to examine the impact of a telemedicine program for people with type 2 diabetes (Box 1).<sup>29</sup> This nested study design allowed the investigators to explore the facilitators and barriers to using telemedicine, as well as participants' view if telemedicine was implemented in routine practice.

### Participants

Participants were recruited from eleven primary care clinics located within the Klang Valley, which is part of the Malaysian Ministry of Health's primary care clinic network. These clinics serve the districts of Klang and Petaling, which provides care for approximately 2.56 million individuals and can be considered to be nationally representative of primary care clinics in Malaysia.

In line with the qualitative nature of our study, we adopted a non-probability sampling approach, in which sampling was not guided by the idea of random selection or statistical representativeness. Nevertheless, we aimed to cover as broad a spectrum of participants who had experience using telemedicine, as possible. As such, we invited participants who had completed the IDEAS study to participate in the current qualitative study. Briefly, participants included those who: 1) had been diagnosed with

1  
2  
3 type 2 diabetes for at least 6 months; 2) aged between 18-75 years; 3) had regular  
4 access to the internet; 4) had HbA1c levels of between 7.5% and 11.0; and 5) were  
5  
6 randomized into the intervention arm of the IDEAS study<sup>29</sup>. Participants were excluded  
7  
8 if they had no experience in using any telemedicine devices or had dropped out of the  
9  
10 IDEAS study. All potentially eligible participants were contacted by telephone and  
11  
12 invited to participate in the qualitative study. Participants were briefed regarding the  
13  
14 purpose, procedure and nature of the study and allowed to clarify their doubts.  
15  
16 Separate information sheet and written informed consent were obtained prior to  
17  
18 participation. To accommodate participants' schedules, all focus group interviews  
19  
20 were conducted at the respective health clinics, when participants visited the clinics  
21  
22 for their follow-up sessions with their physicians. In the event that a participant was  
23  
24 not able to attend a focus group session, an individual in-depth interview was  
25  
26 conducted at their own home. Study participants were incentivized with a RM50  
27  
28 (approximately USD\$12) voucher for their participation.  
29  
30  
31  
32  
33  
34  
35  
36  
37  
38

### 39 **Interview schedule**

40  
41  
42 A semi-structured interview was used in all the focus groups, which was based on an  
43  
44 interview guide. Table 1 outlines the topic areas and key questions which were used  
45  
46 during the discussions. The topic guide aimed to capture the experiences of patients  
47  
48 in using telemedicine and was developed based on relevant literature.<sup>10 12 23</sup>  
49  
50  
51  
52  
53

54 The interviews which was facilitated by the first author (JYL) were conducted either in  
55  
56 Malay or English language. The interviews usually lasted between 35 and 44 minutes  
57  
58 in a private room in the clinic. All interview sessions were digitally recorded,  
59  
60

1  
2  
3 transcribed verbatim immediately after each interview and checked for accuracy by  
4  
5 SWHL. Interviews were conducted to explore for emerging themes with simultaneous  
6  
7 analysis of data until data saturation was achieved, when no new themes or codes  
8  
9 were identified.  
10  
11  
12  
13

### 14 **Data analysis**

15  
16 The NVivo software version 11 (QSR International Pty Ltd) was used to organized and  
17  
18 code the data for thematic analysis, using both an inductive and deductive approach.<sup>30</sup>  
19  
20 All transcripts were read several times to familiarize with the data. Transcripts were  
21  
22 translated from Malay language to English by an independent research assistant. The  
23  
24 translated English transcripts were double checked by one of the authors (JYL) and  
25  
26 any discrepancies were resolved via discussion with another of the authors (SWHL).  
27  
28 Firstly, transcripts were coded into an initial set of themes based on keywords or  
29  
30 phrases that appeared to convey an opinion or perception regarding telemedicine  
31  
32 guided by themes identified previously from previous literature<sup>10 12 23</sup>. These initial  
33  
34 codes were further examined and refined, with codes combined to be main themes if  
35  
36 they had similar contexts or split into subthemes via an inductive process. The final  
37  
38 codes were summarized, cross checked and iteratively refined using paired analysis  
39  
40 of transcripts by two researchers (JYL and SWHL). In the event that there was a  
41  
42 divergent interpretation, the transcripts were reviewed again and discussed until  
43  
44 consensus was achieved.  
45  
46  
47  
48  
49  
50  
51  
52  
53

### 54 **Ethics**

55  
56 The study was approved by the Monash University Research Ethics Committee  
57  
58 (CF14/1977 – 2014001016 & CF15/1073 - 2015000502) and the National Medical  
59  
60

1  
2  
3 Research Register (NMRR-14-177-19466 & NMRR-14-1368-22943). All participants  
4  
5 provided written informed consent for participation in the research. This study was  
6  
7 registered with ClinicalTrials.gov under the registration NCT0246680.  
8  
9  
10

### 11 **Patient and public involvement**

12  
13  
14 The current study was designed to understand the patients' views, perception and  
15  
16 experience of using telemedicine for type 2 diabetes management. Patients were not  
17  
18 involved in the initial design of the study, development of interview questions or  
19  
20 conduct of study. All participants who participated in this qualitative study were not  
21  
22 provided with the results but were informed that the results will be published in a  
23  
24 peer-reviewed journal.  
25  
26  
27  
28  
29  
30  
31  
32  
33  
34  
35  
36  
37  
38  
39  
40  
41  
42  
43  
44  
45  
46  
47  
48  
49  
50  
51  
52  
53  
54  
55  
56  
57  
58  
59  
60

## Results

### Demographics of participants

A total of 48 participants were interviewed in the 12 focus groups (average of 3-4 participants per group) and 2 interview sessions. The participants were mostly females (56.3%), with a mean age of 51.9 years, and a mean duration of diabetes of 5.6 years (Table 2). Four core themes emerged from the focus groups and the two in-depth interviews: (1) Generational difference (2) Independence and convenience, (3) Sharing of health data and privacy; and (4) Concerns and challenges

#### Theme 1 – Generational differences

Our data suggest that there were generational differences with regards to participants' preference on how to record their blood glucose reading. In general, older participants (those aged 50 years and above) preferred to record their glucose readings manually, using pen and paper. They felt that the telemonitoring device required a lot of technical knowledge and was a challenging and complex process for them. As narrated by the participants:

“I (prefer to) manually record (my blood glucose readings). I do not understand (how to operate the mobile) telephone especially opening (the software). To me manual (recording) is easier.” [Patient 4, 59/F]

“But I am an old lady. I like it (blood glucose results) to be written (down). I'm old (and) I need to write (the results) down. Anyway, as long as someone



1  
2  
3 shows me how to do it, I can do it. Of course (using telemedicine) is easier  
4  
5 because you bring your hand phone everywhere you go.” [Patient 5, 57/F]  
6  
7  
8  
9

10 These participants felt that the use of telemedicine was more suitable for younger  
11 individuals with diabetes who were more technology savvy. As explained by one  
12 participant, “Maybe for the young ones . Technology (is) for youngsters (and) is more  
13 suitable since they like to sit at home and like the thing called Internet.” [Patient 41,  
14  
15  
16  
17  
18  
19 67/M]  
20  
21  
22  
23

24 Some participants also expressed their preference to meet their health care providers  
25 in person and reported that travelling to the clinic was not an onerous task.  
26  
27  
28  
29

30 “I don't mind coming to the clinic and have a chat with the doctor. We (can)  
31 discuss (my medical condition) and sometimes we can ask questions and  
32 doctors can show (my problem to me) physically. For me to use the Internet  
33 is difficult to learn (as) my children are not here.” [Patient 6, 60/M]  
34  
35  
36  
37  
38  
39  
40  
41

42 Conversely, younger participants were more inclined to learn and use new  
43 technologies if sufficient training and guidance were given. Additionally, they were  
44 optimistic about using telemedicine to manage their conditions, as they knew the  
45 various benefits that technology would provide, including data tracking ability and  
46 convenience.  
47  
48  
49  
50  
51  
52  
53  
54

## 55 **Theme 2 – Independence and convenience**

56  
57  
58  
59  
60

1  
2  
3 Participants expressed that the use of a mobile phone which was connected to a  
4 glucometer was a convenient alternative for the management of diabetes. Participants  
5 viewed it was a more convenient option in the event of time constraint or when they  
6 had issues commuting to the clinic for their appointment. Participants also mentioned  
7 that having a telemonitoring device encouraged them to monitor their glucose levels  
8 regularly compared to the quarterly check-ups at the clinic. As expressed by  
9 participants  
10  
11  
12  
13  
14  
15  
16  
17  
18  
19  
20  
21

22 “It’s good to use especially over the Internet. It’s so much easier we do not have  
23 to come to the clinic and can stay at home” [Patient 12, 60/M].  
24  
25  
26  
27

28 “Digital way (is the preferred choice). Everyday you can see (your  
29 blood glucose results) in the software so (there is) no need to record  
30 like manual. Sometimes even you record manual the paper will go  
31 wherever (or) missing. (Using) digital you have a backup.” [Patient 8,  
32 35/F]  
33  
34  
35  
36  
37  
38  
39  
40  
41

42 “I like this because you can transfer (your blood glucose results)  
43 directly to your phone. It’s useful to me as an indication. I prefer (using  
44 technology so) that I can use it to check how my medicine affects my  
45 glucose. I think that this is the best tools because you can monitor by  
46 the Internet everywhere you go.” [Patient 9, 44/M]  
47  
48  
49  
50  
51  
52  
53  
54  
55  
56  
57  
58  
59  
60

1  
2  
3 “It’s even more convenient since we do not have the time to come (to  
4 the clinic) and sometimes some people do not have transport.” [Patient  
5  
6  
7  
8 10, 44/F]  
9

10  
11  
12 Most participants were generally enthusiastic as they saw the potential benefits of  
13 telemedicine. Participants described how the use of a web-based glucometer was  
14 useful as it could provide them with reminders and alerts as well as the ability to  
15 connect with their healthcare providers without going to the clinic. Nevertheless, they  
16 expressed the desire and need to have more training and assistance, especially when  
17 they had not used the device for some time, since they would have forgotten the  
18 functions on the device.  
19  
20  
21  
22  
23  
24  
25  
26  
27  
28  
29

30  
31 “For me it’s not difficult ... just need to teach (me) that’s all. See the learning  
32 condition first (and perhaps I need more training), maybe need two or three  
33 times. I’m over fifty (years old) so (the) first time will be a problem .....need  
34 to teach a few times before I understand. First time might be difficult to  
35 understand” [Patient 7, 56/M].  
36  
37  
38  
39  
40  
41  
42  
43  
44  
45  
46  
47  
48

### 49 **Theme 3 – Sharing health data and privacy**

50  
51  
52

53 Our analysis showed that there were conflicting perspectives with data sharing.  
54 Several participants expressed that they were willing to share their monitoring results  
55 with family members, as they felt that the family member would make them  
56  
57  
58  
59  
60

1  
2  
3 accountable for their diabetes management, which was a significant motivation for  
4  
5 them to meet their daily goals.  
6  
7  
8  
9

10 “The use of this what you call it (web-telemonitor)..... (I feel) my health  
11  
12 is better since my family members (also) monitors (my) sugar levels as  
13  
14 well” [Patient 11, 54/F].  
15  
16  
17  
18

19 “The good part (of telemedicine is) you can do it at home. If (you check  
20  
21 your blood glucose levels) at the clinic you get pricked (but) nobody  
22  
23 knows (the results)... but when you do it at home you children will be  
24  
25 informed as well” [Patient 5, 57/F].  
26  
27  
28  
29  
30  
31  
32

33 Conversely, some participants expressed concern on the sharing of medical  
34  
35 information with their family members, which they felt their personal space was  
36  
37 infringed and could potentially lead to conflicts between family members.  
38  
39  
40  
41

42 “That thing (Telemonitoring device) is okay (to use) but what I am afraid of is  
43  
44 (that the use of telemonitoring may) sometimes (cause) conflicts because it  
45  
46 feels like you are being monitored by others. But it is beneficial, at least there  
47  
48 is somebody remind you” [Patient 1, 45/M].  
49  
50  
51  
52

53 Participants also expressed concern about the presence of malware in  
54  
55 telemonitoring devices that could compromise their personal information.  
56  
57  
58  
59  
60

1  
2  
3 “(What happens when we have a) problem with the Internet (connection).  
4  
5 Occasionally we (may) receive the reading, but occasionally (we will be) unable  
6  
7 to (do so). (This can be) very inconvenient” [Patient 11, 54/F].  
8  
9

10  
11  
12  
13  
14  
15 Some participants felt that meeting or contacting their health care providers was a  
16  
17 simpler and faster way to solve their queries as the health care practitioner would be  
18  
19 able to explain their clinical measures in a more concise manner. As explained by  
20  
21 one participant “Face-to face (consultation) is more important (as) its better. (With)  
22  
23 face-to face (consultation), information is clearer and more satisfying to me.” [Patient  
24  
25 2, 67F].  
26  
27  
28  
29

#### 30 **Theme 4 – Concerns and challenges**

31  
32  
33  
34  
35 Participants in this study emphasized the importance of having a user-friendly  
36  
37 technology. Most participants in this study reported minor technical difficulties  
38  
39 especially with Internet connectivity and availability in rural areas, which limited their  
40  
41 ability to utilize the telemonitoring device effectively. Participants also expressed  
42  
43 concerns regarding the stability of Internet connection at their homes.  
44  
45  
46  
47  
48

49 “I think depending on the situation.. whether you live in a village where (I feel)  
50  
51 it will be very difficult..... because (in) certain villages you don't have (Internet)  
52  
53 line so you (will) still need have (to record the blood glucose results) manually”  
54  
55 [Patient 8, 35/F].  
56  
57  
58  
59  
60

1  
2  
3 Participants suggested the need to have a robust system which is user-friendly, with  
4  
5 good technical support which they felt were essential to ensure the successful  
6  
7 implementation of telemedicine.  
8  
9

10  
11  
12 “Okay but what happens when there is a virus? It is a problem for one week my  
13  
14 handphone “hang”. After one week it hangs (again)...that is a problem” [Patient  
15  
16 13, 54/F].  
17  
18  
19

20  
21 Another aspect which participants were worried of was the costs involved compared  
22  
23 to conventional care and that telemonitoring would only be suitable for affluent  
24  
25 patients.  
26  
27  
28  
29

30  
31 “All this (telemedicine) is for people who are wealthy. Of course this is a good  
32  
33 system.” [Patient 14, 63/M]  
34  
35  
36  
37  
38  
39  
40  
41  
42  
43  
44  
45  
46  
47  
48  
49  
50  
51  
52  
53  
54  
55  
56  
57  
58  
59  
60

## Discussion

In our study, we present the conditions for the success of a telemonitoring health device for managing type 2 diabetes, from patients' perspective. We identified a set of distinctive but interrelated conditions which were and will be central to the success of such programs in the context of a developing country. Firstly, participants' demographics played a crucial factor in ensuring the acceptability of telemedicine. We noted that younger participants between the ages of 29 and 50 years old preferred using a web-based glucometer compared to older participants who preferred recording their results manually. Such outcome is not surprising as young individuals who grew up in this digital era were usually more technologically savvy compared to their older counterparts. Participants cited various reasons for being unable to use a web-based glucometer, including the lack of Internet connectivity especially in the rural areas. Indeed, concerns about the stability of Internet connections were the biggest barrier in using telemedicine in diabetes care in this study. The need for a simple, user friendly technology was also consistently highlighted, to encourage acceptability among participants to use a remote telemonitoring system.

As telemedicine technology is improving continuously, participants expressed enthusiasm on the potential added value of telemedicine. Most participants were willing to incorporate technology as part of their diabetes management, but expressed the need to have sufficient training and on-going support, especially when they encountered issues such as equipment limitations. Our study also identified the potential benefits which fueled participants' enthusiasm towards telemedicine. These include receiving alerts, being able to respond to SMBG readings with advice from a

1  
2  
3 health care professional; as well as reducing opportunity cost incurred when using  
4 telemedicine. Our study also offers an additional perspective and insight into the  
5 importance of patient-provider relationship. Our results support previous research  
6 which indicated that personal interaction with a health care practitioner was an  
7 important aspect to support type 2 diabetes patients, especially when it involves  
8 SMBG.<sup>14 31</sup> This view was also expressed by most participants in the present study,  
9 and also that a lack of emotional support especially when communicating through  
10 remote telemonitoring resulted in participants dropping out of the study.  
11  
12  
13  
14  
15  
16  
17  
18  
19  
20  
21  
22

23  
24 Our study also noted that not all participant perceived enhanced SMBG as a positive  
25 tool to help achieve good glycaemic control. Some participants in this study expressed  
26 reservation on the feedback and monitoring feature, which they felt intruded into their  
27 personal space. They also expressed some tension between achieving good  
28 glycaemic control and quality of life, especially with the involvement of health care  
29 providers and family members, who they felt were acting as the “police”. As a result,  
30 some of these patients opted not to take part in the randomized controlled trial, for fear  
31 that this could further amplify the tension and strain in the relationship, an outcome  
32 which they definitely did not want. Findings of this study identified several issues which  
33 are salient in the literature. For example, our study like many others noted that patients  
34 were acceptable to telemedicine due to its ability to reduce travel time<sup>32-34</sup>, increase  
35 self-awareness<sup>35 36</sup> and access to care<sup>37 38</sup>. However, our study also found several  
36 additional barriers that have never been reported in literature, such as the tensions  
37 between operational practicality versus patient’s privacy and health security.  
38  
39  
40  
41  
42  
43  
44  
45  
46  
47  
48  
49  
50  
51  
52  
53  
54  
55  
56  
57  
58  
59  
60



1  
2  
3  
4  
5 Our study offers several strength. By exploring the insights of patients, we illustrate  
6 how family values and technology literacy could influence participants' opinion on  
7 telemonitoring. Our study was also culturally specific to an Asian context and thus, we  
8 could gain an in-depth understanding and broader views of participants' behaviors  
9 when managing diabetes. There were some limitations to our study. Firstly, although  
10 we had included a diverse sample of participants and reached thematic saturation in  
11 our focus groups and in-depth interviews, these participants were only limited to one  
12 geographical location in Malaysia. Participants in this current study were recruited  
13 from suburban districts in Selangor where connectivity and technology literacy were  
14 moderate. Future studies should include patients from both urban as well as rural  
15 locations and those with high technology literacy, as this could potentially influence  
16 the uptake and acceptability of telemedicine. While published literature suggests that  
17 these trends are likely to be transferable to other regions in Malaysia, the context may  
18 differ in other countries and settings. The views expressed here are solely from the  
19 patients' point and does not represent the views of health care providers or policy  
20 makers. Finally, our results cannot draw definitive conclusion regarding differences  
21 in provider practices, patient knowledge as well as attitudes from different clinic sites  
22 other than those examined in this study.  
23  
24  
25  
26  
27  
28  
29  
30  
31  
32  
33  
34  
35  
36  
37  
38  
39  
40  
41  
42  
43  
44  
45  
46  
47  
48  
49  
50

### 51 **Implications for practice**

52 The continual improvements in technology will facilitate the use of telemedicine in  
53 the future. The largest implication will be its ability to reduce logistical barriers and  
54 the potential to save time. However, it is important that any telemedicine programs  
55  
56  
57  
58  
59  
60

1  
2  
3 consider the economic standing and access to technology of patients, especially  
4 those living in rural areas, who may have limited internet connectivity. As such,  
5 health care professionals and policy makers need to take into consideration these  
6 aspects prior to introducing any telemedicine technology for their patients to ensure  
7 that patients' expectations are met. Another theme that emerged from this interview  
8 was the need to invest in capacity building, especially in human resource.  
9  
10 Specifically, the creation of training programs, for both the general public as well as  
11 health care workers, are particularly important, especially among the non-IT savvy  
12 groups.  
13  
14  
15  
16  
17  
18  
19  
20  
21  
22  
23  
24  
25  
26  
27  
28  
29  
30  
31  
32  
33  
34  
35  
36  
37  
38  
39  
40  
41  
42  
43  
44  
45  
46  
47  
48  
49  
50  
51  
52  
53  
54  
55  
56  
57  
58  
59  
60

## Conclusion

In conclusion, findings from this study indicate that the implementation of telemonitoring in diabetes management requires strategic planning with inputs from various stakeholders including, educators, health care providers, telco service providers and patients. The patient's personal and contextual factors, which could have a positive or negative effect on the uptake of the service should be taken into consideration. As such, health care providers need to discuss and consider patients' perspective to ensure the optimal use of telemedicine to improve patients' clinical parameters and quality of life.

## Acknowledgements

The authors would like to thank all participants and health care providers who contributed their time to share their perspectives with us. We also wish to thank Drs Chirk Jenn Ng and Chee Piau Wong for helping to edit the article.

## Funding source

This study was supported by the e-Science fund from the Ministry of Science, Technology and Innovation, Malaysia [03-02-10-SF0238 (MOSTI)], Telemedicine Cluster, Tropical Medicine and Biology platform, Monash University Malaysia (52140757-314-00) and SEGi University Research Fund (SEGi/2013/SKK/04/1).

## Author Disclosure Statement

The authors report no conflict of interest.

## Author Contributions

All authors named contributed substantially to the document. JYL conducted and transcribed the interview, interpreted the results and wrote the draft manuscript. SWHL obtained the funding, designed the study and provided support in editing the manuscript. CKYC, SSC, TP, KKCL, NHN and CSST contributed to the study design and critical review of the manuscript. All authors approved the final version.

## Data sharing statement

1  
2  
3  
4 All data generated or analysed during this study are included in this published  
5  
6  
7 article. They can be made available from the corresponding author on  
8  
9  
10  
11 reasonable request.  
12  
13  
14  
15  
16  
17  
18  
19  
20  
21  
22  
23  
24  
25  
26  
27  
28  
29  
30  
31  
32  
33  
34  
35  
36  
37  
38  
39  
40  
41  
42  
43  
44  
45  
46  
47  
48  
49  
50  
51  
52  
53  
54  
55  
56  
57  
58  
59  
60

For peer review only

## References

1. Ogurtsova K, da Rocha Fernandes JD, Huang Y, et al. IDF Diabetes Atlas: Global estimates for the prevalence of diabetes for 2015 and 2040. *Diabetes Research and Clinical Practice* 2017;128:40-50. doi: 10.1016/j.diabres.2017.03.024
2. International Diabetes Federation. IDF Diabetes Atlas. 8th ed. Brussels, Belgium: International Diabetes Federation 2017.
3. American Diabetes Association. 5. Glycemic Targets. *Diabetes Care* 2016;39(Supplement 1):S39-S46. doi: 10.2337/dc16-S008
4. Farmer AJ, Perera R, Ward A, et al. Meta-analysis of individual patient data in randomised trials of self monitoring of blood glucose in people with non-insulin treated type 2 diabetes. *BMJ* 2012;344 doi: 10.1136/bmj.e486
5. Malanda UL, Welschen LMC, Riphagen II, et al. Self-monitoring of blood glucose in patients with type 2 diabetes mellitus who are not using insulin. *Cochrane Database of Systematic Reviews* 2012(1) doi: 10.1002/14651858.CD005060.pub3
6. Schnell O, Barnard K, Bergenstal R, et al. Clinical Utility of SMBG: Recommendations on the Use and Reporting of SMBG in Clinical Research. *Diabetes Care* 2015;38(9):1627. doi: 10.2337/dc14-2919
7. Machry RV, Rados DV, Gregório GRd, et al. Self-monitoring blood glucose improves glycemic control in type 2 diabetes without intensive treatment: A systematic review and meta-analysis. *Diabetes Research and Clinical Practice* 2018;142:173-87. doi: <https://doi.org/10.1016/j.diabres.2018.05.037>
8. Zhu H, Zhu Y, Leung S-w. Is self-monitoring of blood glucose effective in improving glycaemic control in type 2 diabetes without insulin treatment: a meta-analysis of randomised controlled trials. *BMJ Open* 2016;6(9):e010524. doi: 10.1136/bmjopen-2015-010524

- 1  
2  
3 9. Cox DJ, Gonder-Frederick L, Ritterband L, et al. Prediction of Severe Hypoglycemia.  
4  
5 *Diabetes Care* 2007;30(6):1370. doi: 10.2337/dc06-1386  
6
- 7 10. Malanda UL, Bot SD, Nijpels G. Self-monitoring of blood glucose in noninsulin-using type  
8  
9 2 diabetic patients. *Diabetes Care* 2013;36(1):176. doi: 10.2337/dc12-0831  
10
- 11 11. Lee SWH, Ooi L, Lai YK. Telemedicine for the Management of Glycemic Control and  
12  
13 Clinical Outcomes of Type 1 Diabetes Mellitus: A Systematic Review and Meta-  
14  
15 Analysis of Randomized Controlled Studies. *Frontiers in Pharmacology* 2017;8:330.  
16  
17 doi: 10.3389/fphar.2017.00330  
18
- 19 12. Polonsky WH, Fisher L, Schikman CH, et al. Structured self-monitoring of blood glucose  
20  
21 significantly reduces A1C levels in poorly controlled, noninsulin-treated type 2  
22  
23 diabetes: Results from the structured testing program study. *Diabetes Care*  
24  
25 2011;34(2):262-67. doi: 10.2337/dc10-1732  
26  
27
- 28 13. Fisher L, Polonsky WH, Parkin CG, et al. The impact of structured blood glucose testing  
29  
30 on attitudes toward self-management among poorly controlled, insulin-naive patients  
31  
32 with type 2 diabetes. *Diabetes Research and Clinical Practice* 2012;96(2):149-55.  
33  
34 doi: 10.1016/j.diabres.2011.12.016  
35
- 36 14. Lee JY, Lee SWH, Nasir NH, et al. Diabetes telemonitoring reduces the risk of  
37  
38 hypoglycaemia during Ramadan: a pilot randomized controlled study. *Diabetic*  
39  
40 *Medicine* 2015;32(12):1658-61. doi: 10.1111/dme.12836  
41  
42
- 43 15. Lee JY, Wong CP, Tan CSS, et al. Telemonitoring in fasting individuals with Type 2  
44  
45 Diabetes Mellitus during Ramadan: A prospective, randomised controlled study.  
46  
47 *Scientific Reports* 2017;7(1):10119. doi: 10.1038/s41598-017-10564-y  
48
- 49 16. Lee SWH, Lee JY, San San Tan C, et al. Strategies to make Ramadan fasting safer in  
50  
51 type 2 diabetics: a systematic review and network meta-analysis of randomized  
52  
53 controlled trials and observational studies. *Medicine* 2016;95(2)  
54
- 55 17. Paré G, Jaana M, Sicotte C. Systematic Review of Home Telemonitoring for Chronic  
56  
57 Diseases: The Evidence Base. *Journal of the American Medical Informatics*  
58  
59 *Association : JAMIA* 2007;14(3):269-77. doi: 10.1197/jamia.M2270  
60

- 1  
2  
3 18. Pare G, Moqadem K, Pineau G, et al. Clinical effects of home telemonitoring in the  
4 context of diabetes, asthma, heart failure and hypertension: a systematic review. *J*  
5 *Med Internet Res* 2010;12(2):e21. doi: 10.2196/jmir.1357 [published Online First:  
6 2010/06/18]  
7  
8  
9  
10  
11 19. Hernandez C, Casas A, Escarrabill J, et al. Home hospitalisation of exacerbated chronic  
12 obstructive pulmonary disease patients. *European Respiratory Journal*  
13 2003;21(1):58. doi: 10.1183/09031936.03.00015603  
14  
15  
16  
17 20. Lee SWH, Chan CKY, Chua SS, et al. Comparative effectiveness of telemedicine  
18 strategies on type 2 diabetes management: A systematic review and network meta-  
19 analysis. *Scientific Reports* 2017;7(1):12680. doi: 10.1038/s41598-017-12987-z  
20  
21  
22  
23  
24 21. Jaana M, Pare G. Home telemonitoring of patients with diabetes: a systematic  
25 assessment of observed effects. *Journal of evaluation in clinical practice*  
26 2007;13(2):242-53. doi: 10.1111/j.1365-2753.2006.00686.x [published Online First:  
27 2007/03/24]  
28  
29  
30  
31  
32 22. Heckemann B, Wolf A, Ali L, et al. Discovering untapped relationship potential with  
33 patients in telehealth: a qualitative interview study. *BMJ Open* 2016;6(3):e009750.  
34 doi: 10.1136/bmjopen-2015-009750  
35  
36  
37  
38 23. Scott Kruse C, Karem P, Shifflett K, et al. Evaluating barriers to adopting telemedicine  
39 worldwide: A systematic review. *Journal of telemedicine and telecare* 2018;24(1):4-  
40 12. doi: 10.1177/1357633X16674087 [published Online First: 10/16]  
41  
42  
43  
44 24. Kruse CS, Krowski N, Rodriguez B, et al. Telehealth and patient satisfaction: a  
45 systematic review and narrative analysis. *BMJ open* 2017;7(8):e016242-e42. doi:  
46 10.1136/bmjopen-2017-016242  
47  
48  
49  
50 25. de Souza CHA, Morbeck RA, Steinman M, et al. Barriers and Benefits in Telemedicine  
51 Arising Between a High-Technology Hospital Service Provider and Remote Public  
52 Healthcare Units: A Qualitative Study in Brazil. *Telemedicine and e-Health*  
53 2016;23(6):527-32. doi: 10.1089/tmj.2016.0158  
54  
55  
56  
57  
58  
59  
60



- 1  
2  
3 26. Koivunen M, Saranto K. Nursing professionals' experiences of the facilitators and  
4 barriers to the use of telehealth applications: a systematic review of qualitative  
5 studies. *Scandinavian Journal of Caring Sciences* 2018;32(1):24-44. doi:  
6 10.1111/scs.12445  
7  
8  
9  
10  
11 27. Mair F, Whitten P. Systematic review of studies of patient satisfaction with telemedicine.  
12 *BMJ* 2000;320(7248):1517-20. doi: 10.1136/bmj.320.7248.1517  
13  
14  
15 28. Chan CKY, Oldenburg B, Viswanath K. Advancing the Science of Dissemination and  
16 Implementation in Behavioral Medicine: Evidence and Progress. *International Journal*  
17 *of Behavioral Medicine* 2015;22(3):277-82. doi: 10.1007/s12529-015-9490-2  
18  
19  
20  
21 29. Lee JY, Chan CKY, Chua SS, et al. Intervention for Diabetes with Education,  
22 Advancement and Support (IDEAS) study: protocol for a cluster randomised  
23 controlled trial. *BMC Health Services Research* 2016;16:524. doi: 10.1186/s12913-  
24 016-1782-y  
25  
26  
27  
28  
29  
30 30. Nowell LS, Norris JM, White DE, et al. Thematic Analysis: Striving to Meet the  
31 Trustworthiness Criteria. *International Journal of Qualitative Methods*  
32 2017;16(1):1609406917733847. doi: 10.1177/1609406917733847  
33  
34  
35  
36 31. Heisler M, Bouknight RR, Hayward RA, et al. The relative importance of physician  
37 communication, participatory decision making, and patient understanding in diabetes  
38 self-management. *Journal of general internal medicine* 2002;17(4):243-52.  
39  
40  
41  
42 32. Müller KI, Alstadhaug KB, Bekkelund SI. Acceptability, Feasibility, and Cost of  
43 Telemedicine for Nonacute Headaches: A Randomized Study Comparing Video and  
44 Traditional Consultations. *Journal of medical Internet research* 2016;18(5):e140-e40.  
45 doi: 10.2196/jmir.5221  
46  
47  
48  
49  
50  
51 33. Christensen NP, Danbjørg DB. Use of Video Consultations for Patients With  
52 Hematological Diseases From a Patient Perspective: Qualitative Study. *Journal of*  
53 *Participatory Medicine* 2018;10(4):e11089.  
54  
55  
56  
57 34. Lee JY, Lee SWH. Is telemedicine cost effectiveness for diabetes management: A  
58 systematic review. *Diabetes Technology & Therapeutics* 2018;20(7):492-500.  
59  
60

- 1  
2  
3 35. Piette JD, Marinec N, Gallegos-Cabriaes EC, et al. Spanish-speaking patients'  
4 engagement in interactive voice response (IVR) support calls for chronic disease self-  
5 management: data from three countries. *Journal of telemedicine and telecare*  
6 2013;19(2):89-94. doi: 10.1177/1357633X13476234 [published Online First: 03/26]  
7  
8  
9  
10  
11 36. Whitehead L, Seaton P. The Effectiveness of Self-Management Mobile Phone and  
12 Tablet Apps in Long-term Condition Management: A Systematic Review. *Journal of*  
13 *medical Internet research* 2016;18(5):e97-e97. doi: 10.2196/jmir.4883  
14  
15  
16  
17 37. Polinski JM, Barker T, Gagliano N, et al. Patients' Satisfaction with and Preference for  
18 Telehealth Visits. *Journal of general internal medicine* 2016;31(3):269-75. doi:  
19 10.1007/s11606-015-3489-x [published Online First: 08/13]  
20  
21  
22  
23  
24 38. Anstey Watkins JOT, Goudge J, Gómez-Olivé FX, et al. Mobile phone use among  
25 patients and health workers to enhance primary healthcare: A qualitative study in  
26 rural South Africa. *Social Science & Medicine* 2018;198:139-47. doi:  
27 <https://doi.org/10.1016/j.socscimed.2018.01.011>  
28  
29  
30  
31  
32  
33  
34  
35  
36  
37  
38  
39  
40  
41  
42  
43  
44  
45  
46  
47  
48  
49  
50  
51  
52  
53  
54  
55  
56  
57  
58  
59  
60

**Table 1: The interview guide topic areas and key questions**

| Topic area   | Key questions used in interviews                                                                                                                                                                                                                                                                                                                                                                                                                                               |
|--------------|--------------------------------------------------------------------------------------------------------------------------------------------------------------------------------------------------------------------------------------------------------------------------------------------------------------------------------------------------------------------------------------------------------------------------------------------------------------------------------|
| Diabetes     | <ul style="list-style-type: none"> <li>• How would you describe your experience so far with diabetes?</li> <li>• How have you been coping with diabetes so far? Describe some of the ways you have been coping</li> <li>• Who and how much support do you have to cope with your conditions now</li> <li>• What are some of the most important treatment needs for a patient with diabetes</li> </ul>                                                                          |
| Telemedicine | <ul style="list-style-type: none"> <li>• Describe and tell us your experience with using the web-enabled glucometer so far.</li> <li>• How do you think the system was able to affect your diabetes management?</li> <li>• How do you think other will accept this system?</li> <li>• What would you think are some areas where the system was good and where are the areas we can improve?</li> <li>• What do you think about using this system for the long term?</li> </ul> |

1  
2  
3  
4  
5  
6  
7  
8  
9  
10  
11  
12  
13  
14  
15  
16  
17  
18  
19  
20  
21  
22  
23  
24  
25  
26  
27  
28  
29  
30  
31  
32  
33  
34  
35  
36  
37  
38  
39  
40  
41  
42  
43  
44  
45  
46  
47  
48  
49  
50  
51  
52  
53  
54  
55  
56  
57  
58  
59  
60

|  |                                                                                                                                                                                                              |
|--|--------------------------------------------------------------------------------------------------------------------------------------------------------------------------------------------------------------|
|  | <ul style="list-style-type: none"><li>• What would be some of your concerns (if any) if this was to be used?</li><li>• How was your interaction with your healthcare professional with the device?</li></ul> |
|--|--------------------------------------------------------------------------------------------------------------------------------------------------------------------------------------------------------------|

For peer review only

**Table 2: Baseline demographics of participants who participated in the focus group**

| Patients (n= 48)                             | Men (n = 21) | Women (n = 27) |
|----------------------------------------------|--------------|----------------|
| Age (years)                                  | 54.19        | 50.15          |
| Range                                        | 29-62        | 31-69          |
| Duration of diabetes (years)                 | 4.06         | 6.88           |
| Range                                        | 0.83-24      | 0.5-15         |
| No. of oral hypoglycaemic agents used, n (%) |              |                |
| 1-2                                          | 18 (85)      | 27 (100)       |
| ≥3                                           | 1 (4)        | 0 (0)          |
| No. of antihypertension drugs used, n (%)    |              |                |
| 1-2                                          | 9 (42)       | 11 (40)        |
| ≥3                                           | 3 (14)       | 7 (25)         |
| Insulin use, n (%)                           |              |                |
| Yes                                          | 4 (19)       | 2 (7)          |
| No                                           | 17 (81)      | 25 (93)        |

Data are expressed as mean, unless otherwise stated.

**Box 1: IDEAS study**

The Intervention for Diabetes with Education, Advancement and Support (IDEAS) study is a cluster randomized controlled study to evaluate the use of telemedicine to improve diabetes care. Participants in the telemedicine group were instructed to measure their blood glucose at least twice weekly (one fasting and one non-fasting) or more frequent as recommended by physician. These blood glucose readings will be transmitted via a Bluetooth technology to the participants' mobile phone to a remote secure server. Participants and their physicians were able to access the records on the server. Advice on lifestyle modification, any potential changes in medication, who and how to contact their healthcare providers were also given monthly during the study. A researcher also checked participants' results weekly and initiate intervention if needed (e.g. medication changes, counselling) with the consent of the attending physician.

**Manuscript:** Using telemedicine to support care for people with type 2 diabetes mellitus: A qualitative analysis of patient's perspective

## Consolidated criteria for reporting qualitative studies (COREQ): 32-item checklist

Developed from:

Tong A, Sainsbury P, Craig J. Consolidated criteria for reporting qualitative research (COREQ): a 32-item checklist for interviews and focus groups. *International Journal for Quality in Health Care*. 2007. Volume 19, Number 6: pp. 349 – 357

| No. Item                                       | Guide questions/description                             | Reported on Page # |
|------------------------------------------------|---------------------------------------------------------|--------------------|
| <b>Domain 1: Research team and reflexivity</b> |                                                         |                    |
| <i>Personal Characteristics</i>                |                                                         |                    |
| 1. Inter viewer/facilitator                    | Which author/s conducted the inter view or focus group? | 9&10               |
| 2. Credentials                                 | What were the researcher's credentials? E.g. PhD, MD    | 1                  |
| 3. Occupation                                  | What was their occupation at the time of the study?     | 1                  |
| 4. Gender                                      | Was the researcher male or female?                      | 1                  |
| 5. Experience and training                     | What experience or training did the researcher have?    | 9 & 10             |
| <i>Relationship with participants</i>          |                                                         |                    |
| 6. Relationship                                | Was a relationship established prior to study           | 10                 |

|    |                          |                                                   |   |
|----|--------------------------|---------------------------------------------------|---|
| 1  | established              | commencement?                                     | . |
| 2  |                          |                                                   |   |
| 3  |                          |                                                   |   |
| 4  |                          |                                                   |   |
| 5  | 7. Participant knowledge | What did the participants know about the          | 8 |
| 6  | of the interviewer       | researcher? e.g. personal goals, reasons for      |   |
| 7  |                          | doing the research                                |   |
| 8  |                          |                                                   |   |
| 9  |                          |                                                   |   |
| 10 | 8. Interviewer           | What characteristics were reported about the      | 9 |
| 11 | characteristics          | inter viewer/facilitator? e.g. Bias, assumptions, |   |
| 12 |                          | reasons and interests in the research topic       |   |
| 13 |                          |                                                   |   |
| 14 |                          |                                                   |   |
| 15 |                          |                                                   |   |
| 16 |                          |                                                   |   |
| 17 |                          |                                                   |   |
| 18 |                          |                                                   |   |
| 19 |                          |                                                   |   |
| 20 |                          |                                                   |   |
| 21 |                          |                                                   |   |
| 22 |                          |                                                   |   |
| 23 |                          |                                                   |   |
| 24 |                          |                                                   |   |
| 25 |                          |                                                   |   |
| 26 |                          |                                                   |   |
| 27 |                          |                                                   |   |
| 28 |                          |                                                   |   |
| 29 |                          |                                                   |   |
| 30 |                          |                                                   |   |
| 31 |                          |                                                   |   |
| 32 |                          |                                                   |   |
| 33 |                          |                                                   |   |
| 34 |                          |                                                   |   |
| 35 |                          |                                                   |   |
| 36 |                          |                                                   |   |
| 37 |                          |                                                   |   |
| 38 |                          |                                                   |   |
| 39 |                          |                                                   |   |
| 40 |                          |                                                   |   |
| 41 |                          |                                                   |   |
| 42 |                          |                                                   |   |
| 43 |                          |                                                   |   |
| 44 |                          |                                                   |   |
| 45 |                          |                                                   |   |
| 46 |                          |                                                   |   |
| 47 |                          |                                                   |   |
| 48 |                          |                                                   |   |
| 49 |                          |                                                   |   |
| 50 |                          |                                                   |   |
| 51 |                          |                                                   |   |
| 52 |                          |                                                   |   |
| 53 |                          |                                                   |   |
| 54 |                          |                                                   |   |
| 55 |                          |                                                   |   |
| 56 |                          |                                                   |   |
| 57 |                          |                                                   |   |
| 58 |                          |                                                   |   |
| 59 |                          |                                                   |   |
| 60 |                          |                                                   |   |



|                                          |                                                                                                                                                          |      |
|------------------------------------------|----------------------------------------------------------------------------------------------------------------------------------------------------------|------|
| <b>Domain 2: study design</b>            |                                                                                                                                                          |      |
| <i>Theoretical framework</i>             |                                                                                                                                                          |      |
| 9. Methodological orientation and Theory | What methodological orientation was stated to underpin the study? e.g. grounded theory, discourse analysis, ethnography, phenomenology, content analysis | 9-10 |
| <i>Participant selection</i>             |                                                                                                                                                          |      |
| 10. Sampling                             | How were participants selected? e.g. purposive, convenience, consecutive, snowball                                                                       | 8    |
| 11. Method of approach                   | How were participants approached? e.g. face-to-face, telephone, mail, email                                                                              | 8-9  |
| 12. Sample size                          | How many participants were in the study?                                                                                                                 | 8    |
| 13. Non-participation                    | How many people refused to participate or dropped out? Reasons?                                                                                          | 8    |
| <i>Setting</i>                           |                                                                                                                                                          |      |
| 14. Setting of data collection           | Where was the data collected? e.g. home, clinic, workplace                                                                                               | 9    |
| 15. Presence of non-participants         | Was anyone else present besides the participants and researchers?                                                                                        | 9    |
| 16. Description of sample                | What are the important characteristics of the sample? e.g. demographic data, date                                                                        | 9-10 |
| <i>Data collection</i>                   |                                                                                                                                                          |      |

|                                        |                                                                               |         |
|----------------------------------------|-------------------------------------------------------------------------------|---------|
| 17. Interview guide                    | Were questions, prompts, guides provided by the authors? Was it pilot tested? | Table 1 |
| 18. Repeat interviews                  | Were repeat inter views carried out? If yes, how many?                        | No      |
| 19. Audio/visual recording             | Did the research use audio or visual recording to collect the data?           | 9-10    |
| 20. Field notes                        | Were field notes made during and/or after the inter view or focus group?      | No      |
| 21. Duration                           | What was the duration of the inter views or focus group?                      | 10      |
| 22. Data saturation                    | Was data saturation discussed?                                                | 10      |
| 23. Transcripts returned               | Were transcripts returned to participants for comment and/or correction?      | No      |
| <b>Domain 3: analysis and findings</b> |                                                                               |         |
| <i>Data analysis</i>                   |                                                                               |         |
| 24. Number of data coders              | How many data coders coded the data?                                          | 11      |
| 25. Description of the coding tree     | Did authors provide a description of the coding tree?                         | 11      |
| 26. Derivation of themes               | Were themes identified in advance or derived from the data?                   | No      |
| 27. Software                           | What software, if applicable, was used to manage the data?                    | 11      |
| 28. Participant checking               | Did participants provide feedback on the findings?                            | 12      |
| <i>Reporting</i>                       |                                                                               |         |

|                                  |                                                                                                                                 |                                               |
|----------------------------------|---------------------------------------------------------------------------------------------------------------------------------|-----------------------------------------------|
| 29. Quotations presented         | Were participant quotations presented to illustrate the themes/findings? Was each quotation identified? e.g. participant number | Yes. 13-19                                    |
| 30. Data and findings consistent | Was there consistency between the data presented and the findings?                                                              | 20-23                                         |
| 31. Clarity of major themes      | Were major themes clearly presented in the findings?                                                                            | Yes. they were.<br>13-23                      |
| 32. Clarity of minor themes      | Is there a description of diverse cases or discussion of minor themes?                                                          | Discussion of major and minor themes<br>20-22 |

## Standards for Reporting Qualitative Research (SRQR)\*

<http://www.equator-network.org/reporting-guidelines/srqr/>

Page/line no(s).

### Title and abstract

|                                                                                                                                                                                                                                                              |     |
|--------------------------------------------------------------------------------------------------------------------------------------------------------------------------------------------------------------------------------------------------------------|-----|
| <p><b>Title</b> - Concise description of the nature and topic of the study Identifying the study as qualitative or indicating the approach (e.g., ethnography, grounded theory) or data collection methods (e.g., interview, focus group) is recommended</p> | 1   |
| <p><b>Abstract</b> - Summary of key elements of the study using the abstract format of the intended publication; typically includes background, purpose, methods, results, and conclusions</p>                                                               | 3-4 |

### Introduction

|                                                                                                                                                                     |     |
|---------------------------------------------------------------------------------------------------------------------------------------------------------------------|-----|
| <p><b>Problem formulation</b> - Description and significance of the problem/phenomenon studied; review of relevant theory and empirical work; problem statement</p> | 6-7 |
| <p><b>Purpose or research question</b> - Purpose of the study and specific objectives or questions</p>                                                              | 8   |

### Methods

|                                                                                                                                                                                                                                                                                                                                                                                                             |      |
|-------------------------------------------------------------------------------------------------------------------------------------------------------------------------------------------------------------------------------------------------------------------------------------------------------------------------------------------------------------------------------------------------------------|------|
| <p><b>Qualitative approach and research paradigm</b> - Qualitative approach (e.g., ethnography, grounded theory, case study, phenomenology, narrative research) and guiding theory if appropriate; identifying the research paradigm (e.g., postpositivist, constructivist/ interpretivist) is also recommended; rationale**</p>                                                                            | 10   |
| <p><b>Researcher characteristics and reflexivity</b> - Researchers' characteristics that may influence the research, including personal attributes, qualifications/experience, relationship with participants, assumptions, and/or presuppositions; potential or actual interaction between researchers' characteristics and the research questions, approach, methods, results, and/or transferability</p> | 10   |
| <p><b>Context</b> - Setting/site and salient contextual factors; rationale**</p>                                                                                                                                                                                                                                                                                                                            | 9    |
| <p><b>Sampling strategy</b> - How and why research participants, documents, or events were selected; criteria for deciding when no further sampling was necessary (e.g., sampling saturation); rationale**</p>                                                                                                                                                                                              | 9    |
| <p><b>Ethical issues pertaining to human subjects</b> - Documentation of approval by an appropriate ethics review board and participant consent, or explanation for lack thereof; other confidentiality and data security issues</p>                                                                                                                                                                        | 11   |
| <p><b>Data collection methods</b> - Types of data collected; details of data collection procedures including (as appropriate) start and stop dates of data collection and analysis, iterative process, triangulation of sources/methods, and modification of procedures in response to evolving study findings; rationale**</p>                                                                             | 9-10 |

|                       |                                                                                                                                                                                                                                                       |                 |
|-----------------------|-------------------------------------------------------------------------------------------------------------------------------------------------------------------------------------------------------------------------------------------------------|-----------------|
| 1<br>2<br>3<br>4<br>5 | <b>Data collection instruments and technologies</b> - Description of instruments (e.g., interview guides, questionnaires) and devices (e.g., audio recorders) used for data collection; if/how the instrument(s) changed over the course of the study | 10-11 & Table 1 |
| 6<br>7<br>8           | <b>Units of study</b> - Number and relevant characteristics of participants, documents, or events included in the study; level of participation (could be reported in results)                                                                        | 12              |
| 9<br>10<br>11<br>12   | <b>Data processing</b> - Methods for processing data prior to and during analysis, including transcription, data entry, data management and security, verification of data integrity, data coding, and anonymization/de-identification of excerpts    | 10              |
| 13<br>14<br>15<br>16  | <b>Data analysis</b> - Process by which inferences, themes, etc., were identified and developed, including the researchers involved in data analysis; usually references a specific paradigm or approach; rationale**                                 | 11              |
| 17<br>18<br>19<br>20  | <b>Techniques to enhance trustworthiness</b> - Techniques to enhance trustworthiness and credibility of data analysis (e.g., member checking, audit trail, triangulation); rationale**                                                                | 11              |

### Results/findings

|                      |                                                                                                                                                                                                   |       |
|----------------------|---------------------------------------------------------------------------------------------------------------------------------------------------------------------------------------------------|-------|
| 23<br>24<br>25<br>26 | <b>Synthesis and interpretation</b> - Main findings (e.g., interpretations, inferences, and themes); might include development of a theory or model, or integration with prior research or theory | 13-19 |
| 27<br>28<br>29       | <b>Links to empirical data</b> - Evidence (e.g., quotes, field notes, text excerpts, photographs) to substantiate analytic findings                                                               | 13-19 |

### Discussion

|                                  |                                                                                                                                                                                                                                                                                                                                                                                                             |       |
|----------------------------------|-------------------------------------------------------------------------------------------------------------------------------------------------------------------------------------------------------------------------------------------------------------------------------------------------------------------------------------------------------------------------------------------------------------|-------|
| 32<br>33<br>34<br>35<br>36<br>37 | <b>Integration with prior work, implications, transferability, and contribution(s) to the field</b> - Short summary of main findings; explanation of how findings and conclusions connect to, support, elaborate on, or challenge conclusions of earlier scholarship; discussion of scope of application/generalizability; identification of unique contribution(s) to scholarship in a discipline or field | 20-22 |
| 38<br>39                         | <b>Limitations</b> - Trustworthiness and limitations of findings                                                                                                                                                                                                                                                                                                                                            | 22    |

### Other

|                |                                                                                                                                               |    |
|----------------|-----------------------------------------------------------------------------------------------------------------------------------------------|----|
| 42<br>43<br>44 | <b>Conflicts of interest</b> - Potential sources of influence or perceived influence on study conduct and conclusions; how these were managed | 25 |
| 45<br>46       | <b>Funding</b> - Sources of funding and other support; role of funders in data collection, interpretation, and reporting                      | 25 |

\*The authors created the SRQR by searching the literature to identify guidelines, reporting standards, and critical appraisal criteria for qualitative research; reviewing the reference lists of retrieved sources; and contacting experts to gain feedback. The SRQR aims to improve the transparency of all aspects of qualitative research by providing clear standards for reporting qualitative research.

1  
2  
3  
4  
5  
6  
7  
8  
9  
10  
11  
12  
13  
14  
15  
16  
17  
18  
19  
20  
21  
22  
23  
24  
25  
26  
27  
28  
29  
30  
31  
32  
33  
34  
35  
36  
37  
38  
39  
40  
41  
42  
43  
44  
45  
46  
47  
48  
49  
50  
51  
52  
53  
54  
55  
56  
57  
58  
59  
60

\*\*The rationale should briefly discuss the justification for choosing that theory, approach, method, or technique rather than other options available, the assumptions and limitations implicit in those choices, and how those choices influence study conclusions and transferability. As appropriate, the rationale for several items might be discussed together.

**Reference:**

O'Brien BC, Harris IB, Beckman TJ, Reed DA, Cook DA. **Standards for reporting qualitative research: a synthesis of recommendations.** *Academic Medicine*, Vol. 89, No. 9 / Sept 2014  
DOI: [10.1097/ACM.0000000000000388](https://doi.org/10.1097/ACM.0000000000000388)

For peer review only

# BMJ Open

## Using telemedicine to support care for people with type 2 diabetes mellitus: A qualitative analysis of patient's perspective

|                                 |                                                                                                                                                                                                                                                                                                                                                                                                                                                                                                                                                                                                                                                                                                  |
|---------------------------------|--------------------------------------------------------------------------------------------------------------------------------------------------------------------------------------------------------------------------------------------------------------------------------------------------------------------------------------------------------------------------------------------------------------------------------------------------------------------------------------------------------------------------------------------------------------------------------------------------------------------------------------------------------------------------------------------------|
| Journal:                        | <i>BMJ Open</i>                                                                                                                                                                                                                                                                                                                                                                                                                                                                                                                                                                                                                                                                                  |
| Manuscript ID                   | bmjopen-2018-026575.R3                                                                                                                                                                                                                                                                                                                                                                                                                                                                                                                                                                                                                                                                           |
| Article Type:                   | Original research                                                                                                                                                                                                                                                                                                                                                                                                                                                                                                                                                                                                                                                                                |
| Date Submitted by the Author:   | 02-Aug-2019                                                                                                                                                                                                                                                                                                                                                                                                                                                                                                                                                                                                                                                                                      |
| Complete List of Authors:       | Lee, Jun Yang; Monash University - Malaysia Campus, School of Pharmacy; SEGi University Kota Damansara<br>Chan, Carina; La Trobe University College of Science Health and Engineering<br>Chua, Siew Siang; Taylor's University - Lakeside Campus, School of Pharmacy<br>Paraidathathu, Thomas; Taylor's University - Lakeside Campus, School of Pharmacy<br>Lee, Kenneth Kwing-Chin; Monash University - Malaysia Campus, School of Pharmacy<br>Tan, Christina; HELP International Corporation Bhd<br>Nasir, Nazrila; Kementerian Kesihatan Malaysia<br>Lee, Shaun Wen Huey ; Monash University - Malaysia Campus, School of Pharmacy; Taylor's University - Lakeside Campus, School of Pharmacy |
| <b>Primary Subject Heading</b>: | Diabetes and endocrinology                                                                                                                                                                                                                                                                                                                                                                                                                                                                                                                                                                                                                                                                       |
| Secondary Subject Heading:      | Health informatics, Health services research, Patient-centred medicine, Qualitative research                                                                                                                                                                                                                                                                                                                                                                                                                                                                                                                                                                                                     |
| Keywords:                       | General diabetes < DIABETES & ENDOCRINOLOGY, QUALITATIVE RESEARCH, Telemedicine < BIOTECHNOLOGY & BIOINFORMATICS                                                                                                                                                                                                                                                                                                                                                                                                                                                                                                                                                                                 |
|                                 |                                                                                                                                                                                                                                                                                                                                                                                                                                                                                                                                                                                                                                                                                                  |

SCHOLARONE™  
Manuscripts

1  
2  
3  
4  
5 **Using telemedicine to support care for people with type 2 diabetes mellitus: A**  
6 **qualitative analysis of patient's perspective**  
7  
8  
9

10  
11  
12 Short running title: Patient's perspective of telemedicine  
13  
14

15  
16 <sup>1</sup>Jun Yang LEE <sup>2</sup>Carina Ka Yee CHAN, <sup>3</sup>Siew Siang CHUA, <sup>3</sup>Thomas  
17 PARAIIDATHATHU, <sup>1</sup>Kenneth Kwing-Chin LEE, <sup>4</sup>Christina San San TAN, <sup>5</sup>Nazrila  
18 NASIR, <sup>1,3,6</sup>Shaun Wen Huey LEE  
19  
20  
21  
22

23  
24  
25  
26 <sup>1</sup>School of Pharmacy, Monash University Malaysia, Jalan Lagoon Selatan, Bandar  
27 Sunway, 47500, Subang Jaya, Selangor, Malaysia.  
28

29  
30 <sup>2</sup> School of Psychology and Public Health, College of Science, Health and  
31 Engineering, La Trobe University, Australia.  
32

33  
34  
35 <sup>3</sup>School of Pharmacy, Faculty of Health and Medical Sciences, Taylor's University,  
36 47500 Subang Jaya, Selangor, Malaysia.  
37

38  
39  
40 <sup>4</sup>Centre for Pre-University Studies, HELP College of Arts and Technology, Kuala  
41 Lumpur, Malaysia.  
42

43  
44 <sup>5</sup>Klinik Kesihatan Putrajaya, Putrajaya, Malaysia.  
45

46  
47 <sup>6</sup>Asian Centre for Evidence Synthesis in Population, Implementation and Clinical  
48 Outcomes (PICO), Health and Well-being Cluster, Global Asia in the 21st Century  
49 (GA21) Platform, Monash University Malaysia, Bandar Sunway, Selangor Malaysia  
50  
51

52  
53  
54  
55 *Corresponding author and person in who reprint request should be addressed to*

56  
57  
58 Shaun Lee Wen Huey  
59  
60



1  
2  
3 School of Pharmacy  
4

5 Monash University Malaysia  
6

7 Jalan Lagoon Selatan,  
8

9  
10 47500 Bandar Sunway,  
11

12 Selangor Darul Ehsan,  
13

14 Malaysia.  
15

16 Telephone: +60 3 5514 5890  
17

18 Fax: +60 3 5514 6364  
19

20 Email: [shaun.lee@monash.edu](mailto:shaun.lee@monash.edu)  
21  
22

23  
24  
25  
26 Keywords: telemedicine; qualitative; patient perspective; barriers; diabetes  
27  
28

29  
30 Word count: 3,785 words  
31  
32  
33  
34  
35  
36  
37  
38  
39  
40  
41  
42  
43  
44  
45  
46  
47  
48  
49  
50  
51  
52  
53  
54  
55  
56  
57  
58  
59  
60

## Abstract

**Objective:** Telemedicine has been promoted as an economical and effective way to enhance patient care but its acceptability among patients in low and middle income countries is poorly understood. This study aimed to explore the experiences and perspectives of people with type 2 diabetes mellitus who used telemedicine to manage their condition.

**Design:** We conducted in-depth and focus group interviews with participants who used telemedicine. Questions included participants' perception on program use, satisfaction as well as engagement with the telemedicine program. All interviews and focus groups were audio-recorded and transcribed verbatim. Data were analyzed using a thematic approach.

**Participants and setting:** People with type 2 diabetes ( $n=48$ ) who participated in a randomized controlled study which examined the using telemedicine for diabetes management.

**Results:** Twelve focus groups and two in-depth interviews were conducted. Four themes emerged from the analysis: (1) Generational difference; (2) Independence and convenience, (3) Sharing of health data and privacy; and (4) Concerns and challenges. The main barriers to using telemedicine were related to the user friendliness of the devices as well as internet connectivity. Cost was also another significant concern raised by participants. However, participants were generally positive about the benefits of telemedicine, including its ability to provide real time data and disease monitoring and the reduction in clinic visits.

**Conclusion:** Despite the potential positive benefits of using telemedicine for diabetes care, several barriers could inhibit the sustained and effective use of this technology.

1  
2  
3 As such, collaboration between educators, health care providers, telecommunication  
4 service providers and patients is required to stimulate telemedicine adoption and use.  
5  
6  
7  
8  
9  
10  
11  
12  
13  
14  
15  
16  
17  
18  
19  
20  
21  
22  
23  
24  
25  
26  
27  
28  
29  
30  
31  
32  
33  
34  
35  
36  
37  
38  
39  
40  
41  
42  
43  
44  
45  
46  
47  
48  
49  
50  
51  
52  
53  
54  
55  
56  
57  
58  
59  
60

For peer review only

### Strengths and limitations of this study

- Article followed the Standards for reporting qualitative Research (SRQR) recommendations on reporting
- Focus group discussion allowed the exchange of opinions about telemedicine, leading to richer information
- View and experiences of using telemedicine were captured from patients rather than that of healthcare providers
- The study was conducted in an urban setting in Malaysia and its applicability and transferability to other population remain unknown.

## Introduction

Diabetes is a major health concern worldwide, and according to a recent report by the International Diabetes Federation, the global prevalence of diabetes will increase from 415 million in 2015 to 642 million in 2040.<sup>1</sup> The prevalence varies considerably between different regions, but the epicenter of the diabetes crisis is currently located in the Western Pacific and South-East Asia region, with 159 million and 82 million individuals with diabetes respectively.<sup>2</sup> In many individuals with diabetes, self-monitoring of blood glucose (SMBG) is considered as a key component of treatment, and widely recommended by clinical practice guidelines, irrespective of treatment strategy.<sup>3-7</sup> SMBG is often used as an early warning sign for detecting hypoglycaemia, for improving the recognition of severe hyperglycaemia, to encourage physical activities as well as improve diet control. The data are also used by the treating physicians to facilitate an individualized treatment regimen.

Despite these potential benefits, there is controversy on the efficacy of SMBG, especially in non-insulin dependent type 2 diabetes, due to its cost, uncertainty on frequency of testing as well as impact on patients general health and well-being.<sup>8-10</sup> Studies have shown that the use of enhanced SMBG (where there are high levels of engagement between patients and clinicians to interpret the SMBG values) has resulted in larger reduction in HbA1c compared to regular SMBG.<sup>4 11-13</sup>

The application of telemedicine, or technology to deliver various aspects of health information, prevention, monitoring and medical care in diabetes management has been suggested as an innovative solution to improve diabetes care.<sup>14-16</sup> Increasingly,

1  
2  
3 telemedicine is being viewed as a promising technology to assist patients in managing  
4 diabetes,<sup>15 17 18</sup> as it produces accurate and reliable data<sup>19</sup>, empowers patients<sup>14</sup>,  
5  
6 improves glycaemic control and influences their attitude and behaviours<sup>18 20</sup>,  
7  
8 potentially leading to a better quality of life.<sup>21</sup> These telemedicine services can be  
9  
10 categorized to either synchronous (real-time), asynchronous (whereby data is stored  
11  
12 and forwarded subsequently) and continuous (remote monitoring). In diabetes care,  
13  
14 various forms of telemedicine services have been examined and include the use of  
15  
16 mobile phones, texting, emails, e-health portals, videoconferencing as well as remote  
17  
18 monitoring devices.  
19  
20  
21  
22  
23  
24  
25

26 However, implementation of a telemedicine service in conventional care is a complex  
27  
28 process. While evidence has shown that telemedicine can expand the boundaries of  
29  
30 care to a larger population and offers person-centred care,<sup>22</sup> examples of patients'  
31  
32 resistance to change exist.<sup>23 24</sup> Nevertheless, one of the major limitations of existing  
33  
34 literature is the lack of studies which have examined the perspective of patients from  
35  
36 a low and middle income country, where telemedicine is now increasingly being used.  
37  
38 Earlier work on this topic have mostly focused on the views of physicians and few  
39  
40 studies have explored the patient's perspective.<sup>25 26</sup> There was a limited understanding  
41  
42 on the drivers and barriers faced by patients using telemedicine; and most of these  
43  
44 studies have focused on the telemedicine technology as well as utilization rates of  
45  
46 telemedicine instead.<sup>24 27</sup> Furthermore, very little is known as to how empirically  
47  
48 supported interventions can be transferred or implemented in resource-constraint  
49  
50 countries, i.e., in most developing countries. Understanding the behaviours among  
51  
52 various levels of stakeholders is an important component of successful  
53  
54 implementation research.<sup>28</sup>  
55  
56  
57  
58  
59  
60

1  
2  
3  
4  
5  
6  
7  
8 As patients' experience with telemedicine may be one of the reasons that will  
9  
10 determine the success or failure of any intervention, we conducted a qualitative study  
11  
12 to explore patients' views and experiences of telemedicine for diabetes management  
13  
14 in Malaysia. The study focused on the end users' perspective in context which were  
15  
16 necessary to ensure the successful delivery and implementation of a telemedicine  
17  
18 program for diabetes.  
19  
20  
21  
22  
23  
24  
25  
26  
27  
28  
29  
30  
31  
32  
33  
34  
35  
36  
37  
38  
39  
40  
41  
42  
43  
44  
45  
46  
47  
48  
49  
50  
51  
52  
53  
54  
55  
56  
57  
58  
59  
60

## Materials and Methods

### Study design

The present qualitative study was part of a larger multi-centre cluster randomized controlled study (IDEAS) conducted between April 2015 and June 2017, which aimed to examine the impact of a telemedicine program for people with type 2 diabetes (Box 1).<sup>29 30</sup> This nested study design allowed the investigators to explore the facilitators and barriers to using telemedicine, as well as participants' view if telemedicine was implemented in routine practice.

### Participants

Participants were recruited from eleven primary care clinics located within the Klang Valley, which is part of the Malaysian Ministry of Health's primary care clinic network. These clinics serve the districts of Klang and Petaling, which provides care for approximately 2.56 million individuals and can be considered to be nationally representative of primary care clinics in Malaysia.

In line with the qualitative nature of our study, we adopted a non-probability sampling approach, in which sampling was not guided by the idea of random selection or statistical representativeness. Nevertheless, we aimed to cover as broad a spectrum of participants who had experience using telemedicine, as possible. As such, we invited participants who had completed the IDEAS study to participate in the current qualitative study. Briefly, participants included those who: 1) had been diagnosed with



1  
2  
3 type 2 diabetes for at least 6 months; 2) aged between 18-75 years; 3) had regular  
4 access to the Internet; 4) had HbA1c levels between 7.5% and 11.0%; and 5) were  
5  
6 randomized into the intervention arm of the IDEAS study<sup>29 30</sup>. Participants were  
7  
8 excluded if they had no experience in using any telemedicine devices or had dropped  
9  
10 out of the IDEAS study. All potentially eligible participants were contacted by telephone  
11  
12 and invited to participate in the study. Participants were briefed regarding the purpose,  
13  
14 procedure and voluntary nature of the study and allowed to clarify their doubts.  
15  
16 Separate information sheet and written informed consent were obtained prior to  
17  
18 participation. To accommodate participants' schedules, all focus group interviews  
19  
20 were conducted at the respective health clinics, when participants visited the clinics  
21  
22 for their follow-up sessions with their physicians. In the event that a participant was  
23  
24 not able to attend a focus group session, an individual in-depth interview was  
25  
26 conducted at their own home. Study participants were incentivized with a RM50  
27  
28 (approximately USD\$12) voucher for their participation.  
29  
30  
31  
32  
33  
34  
35  
36  
37  
38  
39  
40  
41  
42  
43  
44  
45  
46  
47  
48  
49  
50  
51  
52  
53  
54  
55  
56  
57  
58  
59  
60

### **Interview schedule**

42 A semi-structured interview was used in all the focus groups, which was based upon  
43 an interview guide. Table 1 outlines the topic areas and key questions which were  
44 used during the discussions. The topic guide aimed to capture the experiences of  
45 patients in using telemedicine and was developed based on relevant literature.<sup>10 12 23</sup>  
46  
47  
48  
49  
50  
51  
52  
53  
54  
55  
56  
57  
58  
59  
60

54 The interviews were facilitated by the first author (JYL) and conducted either in Malay  
55 or English language. Each interview lasted between 35 and 44 minutes in a private  
56 room in the clinic. All interview sessions were digitally recorded, transcribed verbatim  
57  
58  
59  
60

1  
2  
3 immediately after each interview and checked for accuracy by SWHL. Interviews were  
4  
5 conducted to explore for emerging themes with simultaneous analysis of data until  
6  
7 data saturation was achieved, when no new themes or codes were identified.  
8  
9

## 10 11 12 **Data analysis**

13  
14 The NVivo software version 11 (QSR International Pty Ltd) was used to organize and  
15  
16 code the data for thematic analysis, using both an inductive and deductive approach.<sup>31</sup>  
17  
18 All transcripts were read several times to familiarize with the data. Transcripts were  
19  
20 translated from Malay language to English by an independent research assistant. The  
21  
22 translated English transcripts were double checked by the first author (JYL) and any  
23  
24 discrepancies were resolved via discussion with another author (SWHL). Firstly,  
25  
26 transcripts were coded into an initial set of themes based on keywords or phrases that  
27  
28 appeared to convey an opinion or perception regarding telemedicine guided by  
29  
30 themes identified from previous literature<sup>10 12 23</sup>. These initial codes were further  
31  
32 examined and refined, with codes combined to be main themes if they had similar  
33  
34 contexts or split into subthemes via an inductive process. The final codes were  
35  
36 summarized, cross checked and iteratively refined using paired analysis of transcripts  
37  
38 by two researchers (JYL and SWHL). In the event that there was a divergent  
39  
40 interpretation, the transcripts were reviewed again and discussed until consensus was  
41  
42 achieved.  
43  
44  
45  
46  
47  
48  
49  
50

## 51 **Ethics**

52  
53 The study was approved by the Monash University Research Ethics Committee  
54  
55 (CF14/1977 – 2014001016 & CF15/1073 - 2015000502) and the National Medical  
56  
57 Research Register (NMRR-14-177-19466 & NMRR-14-1368-22943). All participants  
58  
59  
60

1  
2  
3 provided written informed consent for participation in the research. This study was  
4  
5 registered with ClinicalTrials.gov under the registration NCT0246680.  
6  
7  
8  
9

### 10 **Patient and public involvement**

11  
12 The current study was designed to understand patients views, perception and  
13  
14 experience of using telemedicine for type 2 diabetes management. Patients were not  
15  
16 involved in the initial design of the study, development of interview questions or  
17  
18 conduct of the study. All participants who participated in this qualitative study were  
19  
20 not provided with the results but were informed that the results will be published in a  
21  
22 peer-reviewed journal.  
23  
24  
25  
26  
27  
28  
29  
30  
31  
32  
33  
34  
35  
36  
37  
38  
39  
40  
41  
42  
43  
44  
45  
46  
47  
48  
49  
50  
51  
52  
53  
54  
55  
56  
57  
58  
59  
60

## Results

### Demographics of participants

A total of 48 participants were interviewed in the 12 focus group and 2 interview sessions. Each focus group had an average of between 3-4 participants, as we had difficulty arranging for larger groups due to different timing of clinic visits. The participants were mostly females (56.3%), with a mean age of 51.9 years, and have had diabetes for 5.6 years on average (Table 2). Four core themes emerged from the focus groups and the two in-depth interviews: (1) Generational difference (2) Independence and convenience, (3) Sharing of health data and privacy; and (4) Concerns and challenges.

#### Theme 1 – Generational differences

Our data suggest that there were generational differences with regards to participants' preference on how to record their blood glucose reading. Generally, older participants in this study (those aged 50 years and above) preferred to record their glucose readings manually, using pen and paper. They felt that the telemonitoring device required a lot of technical knowledge and was a challenging and complex process for them. As narrated by the participants:

“I (prefer to) manually record (my blood glucose readings). I do not understand (how to operate the mobile) telephone especially operating (the software). To me manual (recording) is easier.” [Patient 4, 59/F]

1  
2  
3 “But I am an old lady. I like it (blood glucose results) to be written (down). I'm  
4 old (and) I need to write (the results) down. Anyway, as long as someone  
5 shows me how to do it, I can do it. Of course (using telemedicine) is easier  
6 because you bring your hand phone everywhere you go.” [Patient 5, 57/F]  
7  
8  
9  
10  
11  
12  
13

14 These participants felt that the use of telemedicine was more suited for younger  
15 individuals with diabetes who were more technology savvy. As explained by one  
16 participant, “Maybe for the young ones. Technology (is) for youngsters (and) is more  
17 suitable since they like to sit at home and like the thing called Internet.” [Patient 41,  
18 67/M]  
19  
20  
21  
22  
23  
24  
25  
26  
27

28 Some participants also expressed their preference to meet their health care providers  
29 in person and reported that travelling to the clinic was not an onerous task.  
30  
31  
32  
33  
34

35 “I don't mind coming to the clinic and have a chat with the doctor. We (can)  
36 discuss (my medical condition) and sometimes we can ask questions and  
37 doctors can show (my problem to me) physically. For me to use the Internet  
38 is difficult to learn (as) my children are not here.” [Patient 6, 60/M]  
39  
40  
41  
42  
43  
44  
45  
46

47 Conversely, younger participants were more inclined to learn and use new  
48 technologies if sufficient training and guidance were given. Additionally, they were  
49 optimistic about using telemedicine to manage their conditions, as they knew the  
50 various benefits that technology would provide, including data tracking ability and  
51 convenience.  
52  
53  
54  
55  
56  
57  
58  
59  
60

## Theme 2 – Independence and convenience

Participants expressed that the use of a mobile phone which was connected to a glucometer was a convenient alternative to manage diabetes. Participants viewed it as a more convenient option in the event of time constraint or when they had issues commuting to the clinic for their appointment. Participants also mentioned that having a telemonitoring device encouraged them to monitor their glucose levels regularly compared to the quarterly check-ups at the clinic. As expressed by participants:

“It’s good to use especially over the Internet. It’s so much easier we do not have to come to the clinic and can stay at home” [Patient 12, 60/M].

“Digitals way (is the preferred choice). Everyday you can see (your blood glucose results) in the software so (there is) no need to record like manual. Sometimes even you record manual the paper will go wherever (or) missing. (Using) digital you have a backup.” [Patient 8, 35/F]

“I like this because you can transfer (your blood glucose results) directly to your phone. It’s useful to me as an indication. I prefer (using technology so) that I can use it to check how my medicine affects my glucose. I think that this is the best tools because you can monitor by the Internet everywhere you go.” [Patient 9, 44/M]

1  
2  
3 “It’s even more convenient since we do not have the time to come (to  
4 the clinic) and sometimes some people do not have transport.” [Patient  
5  
6  
7  
8 10, 44/F]  
9

10  
11  
12 Most participants were generally enthusiastic as they saw the potential benefits of  
13 telemedicine. Participants described how the use of a web-based glucometer was  
14  
15 useful as it could provide them with reminders and alerts as well as the ability to  
16  
17 connect with their healthcare providers without going to the clinic. Nevertheless, they  
18  
19 expressed the desire and need to have more training and assistance, especially when  
20  
21 they had not used the device for some time, since they would have forgotten the  
22  
23 functions on the device.  
24  
25  
26  
27  
28  
29  
30

31 “For me it’s not difficult ... just need to teach (me) that’s all. See the learning  
32  
33 condition first (and perhaps I need more training), maybe need two or three  
34  
35 times. I’m over fifty (years old) so (the) first time will be a problem .....need  
36  
37 to teach a few times before I understand. First time might be difficult to  
38  
39 understand” [Patient 7, 56/M].  
40  
41  
42  
43  
44  
45  
46  
47  
48

### 49 **Theme 3 – Sharing health data and privacy**

50  
51  
52

53 Our analysis showed that there were conflicting perspectives with data sharing.  
54  
55 Several participants expressed that they were willing to share their monitoring results  
56  
57 with family members, as they felt that the family member would make them  
58  
59  
60

1  
2  
3 accountable for their diabetes management, which was a significant motivation for  
4  
5 them to meet their daily goals.  
6  
7  
8  
9

10 “The use of this what you call it (web-telemonitor)..... (I feel) my health  
11  
12 is better since my family members (also) monitor (my) sugar levels as  
13  
14 well” [Patient 11, 54/F].  
15  
16  
17  
18

19 “The good part (of telemedicine is) you can do it at home. If (you check  
20  
21 your blood glucose levels) at the clinic you get pricked (but) nobody  
22  
23 knows (the results)... but when you do it at home you children will be  
24  
25 informed as well” [Patient 5, 57/F].  
26  
27  
28  
29  
30  
31  
32

33 Conversely, some participants expressed concern on the sharing of medical  
34  
35 information with their family members, which they felt their personal space was  
36  
37 infringed and could potentially lead to conflicts between family members.  
38  
39  
40  
41

42 “That thing (Telemonitoring device) is okay (to use) but what I am afraid of is  
43  
44 (that the use of telemonitoring may) sometimes (cause) conflicts because it  
45  
46 feels like you are being monitored by others. But it is beneficial, at least there  
47  
48 is somebody remind you” [Patient 1, 45/M].  
49  
50  
51  
52

53 Participants also expressed concern about the presence of malware in  
54  
55 telemonitoring devices that could compromise their personal information.  
56  
57  
58  
59  
60



1  
2  
3 “(What happens when we have a) problem with the Internet (connection).  
4  
5 Occasionally we (may) receive the reading, but occasionally (we will be) unable  
6  
7 to (do so). (This can be) very inconvenient” [Patient 11, 54/F].  
8  
9

10  
11  
12  
13  
14  
15 Some participants felt that meeting or contacting their health care providers was a  
16  
17 simpler and faster way to solve their queries as the health care practitioner would be  
18  
19 able to explain their clinical measures in a more concise manner. As explained by  
20  
21 one participant “Face-to face (consultation) is more important (as) its better. (With)  
22  
23 face-to face (consultation), information is clearer and more satisfying to me.” [Patient  
24  
25 2, 67F].  
26  
27  
28  
29

#### 30 31 **Theme 4 – Concerns and challenges** 32

33  
34  
35 Participants in this study emphasized the importance of having a user-friendly  
36  
37 technology. Most participants in this study reported minor technical difficulties  
38  
39 especially with Internet connectivity and availability in rural areas, which limited their  
40  
41 ability to utilize the telemonitoring device effectively. Participants also expressed  
42  
43 concerns regarding the stability of Internet connection at their homes.  
44  
45  
46  
47  
48

49 “I think depending on the situation.. whether you live in a village where (I feel)  
50  
51 it will be very difficult..... because (in) certain villages you don't have (Internet)  
52  
53 line so you (will) still need have (to record the blood glucose results) manually”  
54  
55 [Patient 8, 35/F].  
56  
57  
58  
59  
60

1  
2  
3 Participants suggested the need to have a robust system which is user-friendly, with  
4  
5 good technical support which they felt were essential to ensure the successful  
6  
7 implementation of telemedicine.  
8  
9

10  
11  
12 “Okay but what happens when there is a virus? It is a problem for one week my  
13  
14 handphone “hang”. After one week it hangs (again)...that is a problem” [Patient  
15  
16 13, 54/F].  
17  
18

19  
20  
21 Another aspect which participants were worried of was the costs involved compared  
22  
23 to conventional care and that telemonitoring would only be suitable for affluent  
24  
25 patients.  
26  
27

28  
29  
30 “All this (telemedicine) is for people who are wealthy. Of course this is a good  
31  
32 system.” [Patient 14, 63/M]  
33  
34  
35  
36  
37  
38  
39  
40  
41  
42  
43  
44  
45  
46  
47  
48  
49  
50  
51  
52  
53  
54  
55  
56  
57  
58  
59  
60

## Discussion

In our study, we present the conditions for the success of a telemonitoring health device for the management of managing type 2 diabetes, from the perspective of patients. We identified a set of distinctive but interrelated conditions which were and would be central to the success of such programs in the context of a developing country. Firstly, participants' demographic characteristics were crucial factors in ensuring the acceptability of telemedicine. We noted that younger participants between the ages of 29 and 50 years old preferred to use a web-based glucometer compared to older participants who preferred to record their results manually. Such outcome is not surprising, as younger individuals who grew up in this digital era were usually more technologically savvy compared to their older counterparts. This was noted in the IDEAS study where the average SMBG uploads were only 1 reading a week instead of the recommended 6 readings a week in the study.<sup>30</sup> Participants cited various reasons for being not being able to use a web-based glucometer. This included the lack of Internet connectivity especially in the rural areas. Concerns about the stability of Internet connections were the main barrier in using telemedicine in the management of diabetes in this study. The need for a simple, user friendly technology was also consistently highlighted, to encourage acceptability among participants on the use of a remote telemonitoring system.

As technology continues to advance, participants expressed enthusiasm on the potential added value of telemedicine. Potential benefits which ignited participants' enthusiasm towards telemedicine included the ability to receive alerts, access to SMBG readings with advice from a health care professional; as well as reduced

1  
2  
3 opportunity cost incurred. Most participants were willing to incorporate technology as  
4 part of their diabetes management, but only if they were confident in using the device  
5 or if they can seek help and support easily. Our study also offers an additional  
6 perspective and insight into the importance of patient-provider relationship. Our results  
7 support previous research which indicated that personal interaction with health care  
8 practitioners was important to support people with type 2 diabetes, especially when it  
9 involved SMBG.<sup>14 32</sup> These views were also expressed by most participants in the  
10 present study, and the lack of emotional support especially when communicating  
11 through remote telemonitoring led to participants dropping out of the study.  
12  
13  
14  
15  
16  
17  
18  
19  
20  
21  
22  
23  
24  
25

26 Living with diabetes can be difficult, especially with the need to comply with a  
27 demanding and often confusing set of self-care directives. Many individuals encounter  
28 diabetes-related conflict with family members, which results in strained relationships.  
29 As noted in this study, some participants expressed reservation on the feedback and  
30 monitoring features of the telemonitoring device, as they felt that the device intruded  
31 into their personal space, as well as gave them the feeling of being “watched”.  
32 Consequently, some patients opted not to participate in the IDEAS<sup>29</sup> randomized  
33 controlled trial. Findings of this study identified several issues which are salient in the  
34 literature. For example, like many others noted that patients accepted telemedicine  
35 due to its ability to reduce travel time<sup>33-35</sup>, increase self-awareness<sup>36 37</sup> and increase  
36 access to care<sup>38 39</sup>.  
37  
38  
39  
40  
41  
42  
43  
44  
45  
46  
47  
48  
49  
50  
51  
52  
53

54 The present study also found several additional barriers that have not been reported  
55 in literature, such as tension between operational practicality versus patient’s privacy  
56 and health security. As privacy and security risk may undermine the potential of  
57  
58  
59  
60

1  
2  
3 telemedicine, it is important that software developers consider this aspect as  
4 information security is crucial to support a trusting relationship between patients and  
5 providers. Therefore, collaboration with researchers in the field of security, especially  
6 those specializing in network security and cryptography.  
7  
8  
9  
10  
11  
12  
13  
14  
15  
16

17 Our study offers several strengths. By exploring the insights of patients, we illustrate  
18 how family values and technology literacy could influence participants' opinion on  
19 telemonitoring. This method also allowed us to gain an in-depth understanding and  
20 broader views of participants' behaviours when managing diabetes. Our study was  
21 also culturally specific to an Asian context. There were some limitations to our study.  
22 Firstly, although we had included a diverse sample of participants and reached  
23 thematic saturation in our focus groups and in-depth interviews, these participants  
24 were only limited to one geographical location in Malaysia. Participants in this current  
25 study were recruited from suburban districts in Selangor where connectivity and  
26 technology literacy were moderate. Future studies should include patients from both  
27 urban as well as rural locations and among participants with high technology literacy,  
28 as this could potentially influence the uptake and acceptability of telemedicine. While  
29 published literature suggests that these trends are likely to be transferable to other  
30 regions in Malaysia, the context may differ in other countries and settings. The views  
31 expressed here are solely from the patients' point and does not represent the views of  
32 health care providers or policy makers. Finally, our results cannot draw definitive  
33 conclusion regarding differences in provider practices, patient knowledge as well as  
34 attitudes from different clinic sites other than those examined in this study.  
35  
36  
37  
38  
39  
40  
41  
42  
43  
44  
45  
46  
47  
48  
49  
50  
51  
52  
53  
54  
55  
56  
57  
58  
59  
60

## Implications for practice

The continual development and improvement in technology will facilitate the use of telemedicine in the future. The largest potential of telemedicine will be its ability to reduce logistical barriers and hence saves time. However, before any telemedicine programs are introduced, there is a need to consider the economic standing of patients and their access to technology. Those living in rural areas may have limited internet connectivity and hence efforts must be made to ensure that the expectations of patients are met. In addition, there is also a need to invest in capacity building, especially in human resource. Specifically, the creation of training programs on the functionalities of telemedicine for both the general public as well as health care workers, are particularly important, especially among the non-IT savvy groups.

## Conclusion

Findings from this study indicate that the implementation of telemonitoring in diabetes management requires strategic planning with inputs from various stakeholders including, educators, health care providers, telco service providers and patients. The patient's personal and contextual factors, which could have a positive or negative effect on the uptake of the service should be taken into consideration. As such, health care providers need to discuss and consider the perspective of patients to ensure the optimal use of telemedicine to improve patients clinical parameters and quality of life.

## Acknowledgements

The authors would like to thank all participants and health care providers who contributed their time to share their perspectives with us. We also wish to thank Drs Chirk Jenn Ng and Chee Piau Wong for helping to edit the article.

## Funding source

This study was supported by the e-Science fund from the Ministry of Science, Technology and Innovation, Malaysia [03-02-10-SF0238 (MOSTI)], Telemedicine Cluster, Tropical Medicine and Biology platform, Monash University Malaysia (52140757-314-00) and SEGi University Research Fund (SEGi/2013/SKK/04/1).

## Author Disclosure Statement

The authors report no conflict of interest.

## Author Contributions

All authors named contributed substantially to the document. JYL conducted and transcribed the interview, interpreted the results and wrote the draft manuscript. SWHL obtained the funding, designed the study and provided support in editing the manuscript. CKYC, SSC, TP, KKCL, NHN and CSST contributed to the study design and critical review of the manuscript. All authors approved the final version.

## Data sharing statement



1  
2  
3  
4 All data generated or analyzed during this study are included in this published  
5  
6  
7 article. They can be made available from the corresponding author on  
8  
9  
10  
11 reasonable request.  
12  
13  
14  
15  
16  
17  
18  
19  
20  
21  
22  
23  
24  
25  
26  
27  
28  
29  
30  
31  
32  
33  
34  
35  
36  
37  
38  
39  
40  
41  
42  
43  
44  
45  
46  
47  
48  
49  
50  
51  
52  
53  
54  
55  
56  
57  
58  
59  
60

For peer review only

## References

1. Ogurtsova K, da Rocha Fernandes JD, Huang Y, et al. IDF Diabetes Atlas: Global estimates for the prevalence of diabetes for 2015 and 2040. *Diabetes Research and Clinical Practice* 2017;128:40-50. doi: 10.1016/j.diabres.2017.03.024
2. International Diabetes Federation. IDF Diabetes Atlas. 8th ed. Brussels, Belgium: International Diabetes Federation 2017.
3. American Diabetes Association. 5. Glycemic Targets. *Diabetes Care* 2016;39(Supplement 1):S39-S46. doi: 10.2337/dc16-S008
4. Farmer AJ, Perera R, Ward A, et al. Meta-analysis of individual patient data in randomised trials of self monitoring of blood glucose in people with non-insulin treated type 2 diabetes. *BMJ* 2012;344 doi: 10.1136/bmj.e486
5. Malanda UL, Welschen LMC, Riphagen II, et al. Self-monitoring of blood glucose in patients with type 2 diabetes mellitus who are not using insulin. *Cochrane Database of Systematic Reviews* 2012(1) doi: 10.1002/14651858.CD005060.pub3
6. Schnell O, Barnard K, Bergenstal R, et al. Clinical Utility of SMBG: Recommendations on the Use and Reporting of SMBG in Clinical Research. *Diabetes Care* 2015;38(9):1627. doi: 10.2337/dc14-2919
7. Machry RV, Rados DV, Gregório GRd, et al. Self-monitoring blood glucose improves glycemic control in type 2 diabetes without intensive treatment: A systematic review and meta-analysis. *Diabetes Research and Clinical Practice* 2018;142:173-87. doi: <https://doi.org/10.1016/j.diabres.2018.05.037>
8. Zhu H, Zhu Y, Leung S-w. Is self-monitoring of blood glucose effective in improving glycaemic control in type 2 diabetes without insulin treatment: a meta-analysis of randomised controlled trials. *BMJ Open* 2016;6(9):e010524. doi: 10.1136/bmjopen-2015-010524
9. Cox DJ, Gonder-Frederick L, Ritterband L, et al. Prediction of Severe Hypoglycemia. *Diabetes Care* 2007;30(6):1370. doi: 10.2337/dc06-1386
10. Malanda UL, Bot SD, Nijpels G. Self-monitoring of blood glucose in noninsulin-using type 2 diabetic patients. *Diabetes Care* 2013;36(1):176. doi: 10.2337/dc12-0831
11. Lee SWH, Ooi L, Lai YK. Telemedicine for the Management of Glycemic Control and Clinical Outcomes of Type 1 Diabetes Mellitus: A Systematic Review and Meta-Analysis of Randomized Controlled Studies. *Frontiers in Pharmacology* 2017;8:330. doi: 10.3389/fphar.2017.00330
12. Polonsky WH, Fisher L, Schikman CH, et al. Structured self-monitoring of blood glucose significantly reduces A1C levels in poorly controlled, noninsulin-treated type 2 diabetes: Results from the structured testing program study. *Diabetes Care* 2011;34(2):262-67. doi: 10.2337/dc10-1732
13. Fisher L, Polonsky WH, Parkin CG, et al. The impact of structured blood glucose testing on attitudes toward self-management among poorly controlled, insulin-naive patients with type 2 diabetes. *Diabetes Research and Clinical Practice* 2012;96(2):149-55. doi: 10.1016/j.diabres.2011.12.016
14. Lee JY, Lee SWH, Nasir NH, et al. Diabetes telemonitoring reduces the risk of hypoglycaemia during Ramadan: a pilot randomized controlled study. *Diabetic Medicine* 2015;32(12):1658-61. doi: 10.1111/dme.12836

15. Lee JY, Wong CP, Tan CSS, et al. Telemonitoring in fasting individuals with Type 2 Diabetes Mellitus during Ramadan: A prospective, randomised controlled study. *Scientific Reports* 2017;7(1):10119. doi: 10.1038/s41598-017-10564-y
16. Lee SWH, Lee JY, San San Tan C, et al. Strategies to make Ramadan fasting safer in type 2 diabetics: a systematic review and network meta-analysis of randomized controlled trials and observational studies. *Medicine* 2016;95(2)
17. Paré G, Jaana M, Sicotte C. Systematic Review of Home Telemonitoring for Chronic Diseases: The Evidence Base. *Journal of the American Medical Informatics Association : JAMIA* 2007;14(3):269-77. doi: 10.1197/jamia.M2270
18. Pare G, Moqadem K, Pineau G, et al. Clinical effects of home telemonitoring in the context of diabetes, asthma, heart failure and hypertension: a systematic review. *J Med Internet Res* 2010;12(2):e21. doi: 10.2196/jmir.1357 [published Online First: 2010/06/18]
19. Hernandez C, Casas A, Escarrabill J, et al. Home hospitalisation of exacerbated chronic obstructive pulmonary disease patients. *European Respiratory Journal* 2003;21(1):58. doi: 10.1183/09031936.03.00015603
20. Lee SWH, Chan CKY, Chua SS, et al. Comparative effectiveness of telemedicine strategies on type 2 diabetes management: A systematic review and network meta-analysis. *Scientific Reports* 2017;7(1):12680. doi: 10.1038/s41598-017-12987-z
21. Jaana M, Pare G. Home telemonitoring of patients with diabetes: a systematic assessment of observed effects. *Journal of evaluation in clinical practice* 2007;13(2):242-53. doi: 10.1111/j.1365-2753.2006.00686.x [published Online First: 2007/03/24]
22. Heckemann B, Wolf A, Ali L, et al. Discovering untapped relationship potential with patients in telehealth: a qualitative interview study. *BMJ Open* 2016;6(3):e009750. doi: 10.1136/bmjopen-2015-009750
23. Scott Kruse C, Karem P, Shifflett K, et al. Evaluating barriers to adopting telemedicine worldwide: A systematic review. *Journal of telemedicine and telecare* 2018;24(1):4-12. doi: 10.1177/1357633X16674087 [published Online First: 10/16]
24. Kruse CS, Krowski N, Rodriguez B, et al. Telehealth and patient satisfaction: a systematic review and narrative analysis. *BMJ open* 2017;7(8):e016242-e42. doi: 10.1136/bmjopen-2017-016242
25. de Souza CHA, Morbeck RA, Steinman M, et al. Barriers and Benefits in Telemedicine Arising Between a High-Technology Hospital Service Provider and Remote Public Healthcare Units: A Qualitative Study in Brazil. *Telemedicine and e-Health* 2016;23(6):527-32. doi: 10.1089/tmj.2016.0158
26. Koivunen M, Saranto K. Nursing professionals' experiences of the facilitators and barriers to the use of telehealth applications: a systematic review of qualitative studies. *Scandinavian Journal of Caring Sciences* 2018;32(1):24-44. doi: 10.1111/scs.12445
27. Mair F, Whitten P. Systematic review of studies of patient satisfaction with telemedicine. *BMJ* 2000;320(7248):1517-20. doi: 10.1136/bmj.320.7248.1517
28. Chan CKY, Oldenburg B, Viswanath K. Advancing the Science of Dissemination and Implementation in Behavioral Medicine: Evidence and Progress. *International Journal of Behavioral Medicine* 2015;22(3):277-82. doi: 10.1007/s12529-015-9490-2
29. Lee JY, Chan CKY, Chua SS, et al. Intervention for Diabetes with Education, Advancement and Support (IDEAS) study: protocol for a cluster randomised controlled trial. *BMC Health Services Research* 2016;16:524. doi: 10.1186/s12913-016-1782-y

- 1  
2  
3  
4  
5  
6  
7  
8  
9  
10  
11  
12  
13  
14  
15  
16  
17  
18  
19  
20  
21  
22  
23  
24  
25  
26  
27  
28  
29  
30  
31  
32  
33  
34  
35  
36  
37  
38  
39  
40  
41  
42  
43  
44  
45  
46  
47  
48  
49  
50  
51  
52  
53  
54  
55  
56  
57  
58  
59  
60
30. Lee JY, Chan CKY, Chua SS, et al. Telemonitoring and Team-based Management of Glycemic Control on People with Type 2 Diabetes: A Cluster Randomized Controlled Trial *Journal of General Internal Medicine* 2019:Accepted, In press.
  31. Nowell LS, Norris JM, White DE, et al. Thematic Analysis: Striving to Meet the Trustworthiness Criteria. *International Journal of Qualitative Methods* 2017;16(1):1609406917733847. doi: 10.1177/1609406917733847
  32. Heisler M, Bouknight RR, Hayward RA, et al. The relative importance of physician communication, participatory decision making, and patient understanding in diabetes self-management. *Journal of general internal medicine* 2002;17(4):243-52.
  33. Müller KI, Alstadhaug KB, Bekkelund SI. Acceptability, Feasibility, and Cost of Telemedicine for Nonacute Headaches: A Randomized Study Comparing Video and Traditional Consultations. *Journal of medical Internet research* 2016;18(5):e140-e40. doi: 10.2196/jmir.5221
  34. Christensen NP, Danbjørg DB. Use of Video Consultations for Patients With Hematological Diseases From a Patient Perspective: Qualitative Study. *Journal of Participatory Medicine* 2018;10(4):e11089.
  35. Lee JY, Lee SWH. Is telemedicine cost effectiveness for diabetes management: A systematic review. *Diabetes Technology & Therapeutics* 2018;20(7):492-500.
  36. Piette JD, Marinec N, Gallegos-Cabrales EC, et al. Spanish-speaking patients' engagement in interactive voice response (IVR) support calls for chronic disease self-management: data from three countries. *Journal of telemedicine and telecare* 2013;19(2):89-94. doi: 10.1177/1357633X13476234 [published Online First: 03/26]
  37. Whitehead L, Seaton P. The Effectiveness of Self-Management Mobile Phone and Tablet Apps in Long-term Condition Management: A Systematic Review. *Journal of medical Internet research* 2016;18(5):e97-e97. doi: 10.2196/jmir.4883
  38. Polinski JM, Barker T, Gagliano N, et al. Patients' Satisfaction with and Preference for Telehealth Visits. *Journal of general internal medicine* 2016;31(3):269-75. doi: 10.1007/s11606-015-3489-x [published Online First: 08/13]
  39. Anstey Watkins JOT, Goudge J, Gómez-Olivé FX, et al. Mobile phone use among patients and health workers to enhance primary healthcare: A qualitative study in rural South Africa. *Social Science & Medicine* 2018;198:139-47. doi: <https://doi.org/10.1016/j.socscimed.2018.01.011>

**Table 1: The interview guide topic areas and key questions**

| Topic area   | Key questions used in interviews                                                                                                                                                                                                                                                                                                                                                                                                                                               |
|--------------|--------------------------------------------------------------------------------------------------------------------------------------------------------------------------------------------------------------------------------------------------------------------------------------------------------------------------------------------------------------------------------------------------------------------------------------------------------------------------------|
| Diabetes     | <ul style="list-style-type: none"> <li>• How would you describe your experience so far with diabetes?</li> <li>• How have you been coping with diabetes so far? Describe some of the ways you have been coping</li> <li>• Who and how much support do you have to cope with your conditions now</li> <li>• What are some of the most important treatment needs for a patient with diabetes</li> </ul>                                                                          |
| Telemedicine | <ul style="list-style-type: none"> <li>• Describe and tell us your experience with using the web-enabled glucometer so far.</li> <li>• How do you think the system was able to affect your diabetes management?</li> <li>• How do you think other will accept this system?</li> <li>• What would you think are some areas where the system was good and where are the areas we can improve?</li> <li>• What do you think about using this system for the long term?</li> </ul> |

1  
2  
3  
4  
5  
6  
7  
8  
9  
10  
11  
12  
13  
14  
15  
16  
17  
18  
19  
20  
21  
22  
23  
24  
25  
26  
27  
28  
29  
30  
31  
32  
33  
34  
35  
36  
37  
38  
39  
40  
41  
42  
43  
44  
45  
46  
47  
48  
49  
50  
51  
52  
53  
54  
55  
56  
57  
58  
59  
60

|  |                                                                                                                                                                                                              |
|--|--------------------------------------------------------------------------------------------------------------------------------------------------------------------------------------------------------------|
|  | <ul style="list-style-type: none"><li>• What would be some of your concerns (if any) if this was to be used?</li><li>• How was your interaction with your healthcare professional with the device?</li></ul> |
|--|--------------------------------------------------------------------------------------------------------------------------------------------------------------------------------------------------------------|

For peer review only

**Table 2: Baseline demographics of participants who participated in the focus group**

| Patients (n= 48)                             | Men (n = 21) | Women (n = 27) |
|----------------------------------------------|--------------|----------------|
| Age (years)                                  | 54.19        | 50.15          |
| Range                                        | 29-62        | 31-69          |
| Duration of diabetes (years)                 | 4.06         | 6.88           |
| Range                                        | 0.83-24      | 0.5-15         |
| No. of oral hypoglycaemic agents used, n (%) |              |                |
| 1-2                                          | 18 (85)      | 27 (100)       |
| ≥3                                           | 1 (4)        | 0 (0)          |
| No. of antihypertension drugs used, n (%)    |              |                |
| 1-2                                          | 9 (42)       | 11 (40)        |
| ≥3                                           | 3 (14)       | 7 (25)         |
| Insulin use, n (%)                           |              |                |
| Yes                                          | 4 (19)       | 2 (7)          |
| No                                           | 17 (81)      | 25 (93)        |

Data are expressed as mean, unless otherwise stated.

**Box 1: IDEAS study**

The Intervention for Diabetes with Education, Advancement and Support (IDEAS) study is a cluster randomized controlled study to evaluate the use of telemedicine to improve diabetes care. Participants in the telemedicine group were instructed to measure their blood glucose at least twice weekly (one fasting and one non-fasting) or more frequent as recommended by physician. These blood glucose readings will be transmitted via a Bluetooth technology to the participants' mobile phone to a remote secure server. Participants and their physicians were able to access the records on the server. Advice on lifestyle modification, any potential changes in medication, who and how to contact their healthcare providers were also given monthly during the study. A researcher also checked participants' results weekly and initiate intervention if needed (e.g. medication changes, counselling) with the consent of the attending physician.



## Standards for Reporting Qualitative Research (SRQR)\*

<http://www.equator-network.org/reporting-guidelines/srqr/>

Page/line no(s).

### Title and abstract

|                                                                                                                                                                                                                                                              |     |
|--------------------------------------------------------------------------------------------------------------------------------------------------------------------------------------------------------------------------------------------------------------|-----|
| <p><b>Title</b> - Concise description of the nature and topic of the study Identifying the study as qualitative or indicating the approach (e.g., ethnography, grounded theory) or data collection methods (e.g., interview, focus group) is recommended</p> | 1   |
| <p><b>Abstract</b> - Summary of key elements of the study using the abstract format of the intended publication; typically includes background, purpose, methods, results, and conclusions</p>                                                               | 3-4 |

### Introduction

|                                                                                                                                                                     |     |
|---------------------------------------------------------------------------------------------------------------------------------------------------------------------|-----|
| <p><b>Problem formulation</b> - Description and significance of the problem/phenomenon studied; review of relevant theory and empirical work; problem statement</p> | 6-7 |
| <p><b>Purpose or research question</b> - Purpose of the study and specific objectives or questions</p>                                                              | 8   |

### Methods

|                                                                                                                                                                                                                                                                                                                                                                                                             |      |
|-------------------------------------------------------------------------------------------------------------------------------------------------------------------------------------------------------------------------------------------------------------------------------------------------------------------------------------------------------------------------------------------------------------|------|
| <p><b>Qualitative approach and research paradigm</b> - Qualitative approach (e.g., ethnography, grounded theory, case study, phenomenology, narrative research) and guiding theory if appropriate; identifying the research paradigm (e.g., postpositivist, constructivist/ interpretivist) is also recommended; rationale**</p>                                                                            | 10   |
| <p><b>Researcher characteristics and reflexivity</b> - Researchers' characteristics that may influence the research, including personal attributes, qualifications/experience, relationship with participants, assumptions, and/or presuppositions; potential or actual interaction between researchers' characteristics and the research questions, approach, methods, results, and/or transferability</p> | 10   |
| <p><b>Context</b> - Setting/site and salient contextual factors; rationale**</p>                                                                                                                                                                                                                                                                                                                            | 9    |
| <p><b>Sampling strategy</b> - How and why research participants, documents, or events were selected; criteria for deciding when no further sampling was necessary (e.g., sampling saturation); rationale**</p>                                                                                                                                                                                              | 9    |
| <p><b>Ethical issues pertaining to human subjects</b> - Documentation of approval by an appropriate ethics review board and participant consent, or explanation for lack thereof; other confidentiality and data security issues</p>                                                                                                                                                                        | 11   |
| <p><b>Data collection methods</b> - Types of data collected; details of data collection procedures including (as appropriate) start and stop dates of data collection and analysis, iterative process, triangulation of sources/methods, and modification of procedures in response to evolving study findings; rationale**</p>                                                                             | 9-10 |

|                       |                                                                                                                                                                                                                                                       |                 |
|-----------------------|-------------------------------------------------------------------------------------------------------------------------------------------------------------------------------------------------------------------------------------------------------|-----------------|
| 1<br>2<br>3<br>4<br>5 | <b>Data collection instruments and technologies</b> - Description of instruments (e.g., interview guides, questionnaires) and devices (e.g., audio recorders) used for data collection; if/how the instrument(s) changed over the course of the study | 10-11 & Table 1 |
| 6<br>7<br>8           | <b>Units of study</b> - Number and relevant characteristics of participants, documents, or events included in the study; level of participation (could be reported in results)                                                                        | 12              |
| 9<br>10<br>11<br>12   | <b>Data processing</b> - Methods for processing data prior to and during analysis, including transcription, data entry, data management and security, verification of data integrity, data coding, and anonymization/de-identification of excerpts    | 10              |
| 13<br>14<br>15<br>16  | <b>Data analysis</b> - Process by which inferences, themes, etc., were identified and developed, including the researchers involved in data analysis; usually references a specific paradigm or approach; rationale**                                 | 11              |
| 17<br>18<br>19<br>20  | <b>Techniques to enhance trustworthiness</b> - Techniques to enhance trustworthiness and credibility of data analysis (e.g., member checking, audit trail, triangulation); rationale**                                                                | 11              |

### Results/findings

|                      |                                                                                                                                                                                                   |       |
|----------------------|---------------------------------------------------------------------------------------------------------------------------------------------------------------------------------------------------|-------|
| 23<br>24<br>25<br>26 | <b>Synthesis and interpretation</b> - Main findings (e.g., interpretations, inferences, and themes); might include development of a theory or model, or integration with prior research or theory | 13-19 |
| 27<br>28<br>29       | <b>Links to empirical data</b> - Evidence (e.g., quotes, field notes, text excerpts, photographs) to substantiate analytic findings                                                               | 13-19 |

### Discussion

|                                  |                                                                                                                                                                                                                                                                                                                                                                                                             |       |
|----------------------------------|-------------------------------------------------------------------------------------------------------------------------------------------------------------------------------------------------------------------------------------------------------------------------------------------------------------------------------------------------------------------------------------------------------------|-------|
| 32<br>33<br>34<br>35<br>36<br>37 | <b>Integration with prior work, implications, transferability, and contribution(s) to the field</b> - Short summary of main findings; explanation of how findings and conclusions connect to, support, elaborate on, or challenge conclusions of earlier scholarship; discussion of scope of application/generalizability; identification of unique contribution(s) to scholarship in a discipline or field | 20-22 |
| 38<br>39                         | <b>Limitations</b> - Trustworthiness and limitations of findings                                                                                                                                                                                                                                                                                                                                            | 22    |

### Other

|                |                                                                                                                                               |    |
|----------------|-----------------------------------------------------------------------------------------------------------------------------------------------|----|
| 42<br>43<br>44 | <b>Conflicts of interest</b> - Potential sources of influence or perceived influence on study conduct and conclusions; how these were managed | 25 |
| 45<br>46       | <b>Funding</b> - Sources of funding and other support; role of funders in data collection, interpretation, and reporting                      | 25 |

\*The authors created the SRQR by searching the literature to identify guidelines, reporting standards, and critical appraisal criteria for qualitative research; reviewing the reference lists of retrieved sources; and contacting experts to gain feedback. The SRQR aims to improve the transparency of all aspects of qualitative research by providing clear standards for reporting qualitative research.

1  
2  
3  
4  
5  
6  
7  
8  
9  
10  
11  
12  
13  
14  
15  
16  
17  
18  
19  
20  
21  
22  
23  
24  
25  
26  
27  
28  
29  
30  
31  
32  
33  
34  
35  
36  
37  
38  
39  
40  
41  
42  
43  
44  
45  
46  
47  
48  
49  
50  
51  
52  
53  
54  
55  
56  
57  
58  
59  
60

\*\*The rationale should briefly discuss the justification for choosing that theory, approach, method, or technique rather than other options available, the assumptions and limitations implicit in those choices, and how those choices influence study conclusions and transferability. As appropriate, the rationale for several items might be discussed together.

**Reference:**

O'Brien BC, Harris IB, Beckman TJ, Reed DA, Cook DA. **Standards for reporting qualitative research: a synthesis of recommendations.** *Academic Medicine*, Vol. 89, No. 9 / Sept 2014  
DOI: 10.1097/ACM.0000000000000388

For peer review only

# BMJ Open

## Using telemedicine to support care for people with type 2 diabetes mellitus: A qualitative analysis of patients' perspectives

|                                 |                                                                                                                                                                                                                                                                                                                                                                                                                                                                                                                                                                                                                                                                                                  |
|---------------------------------|--------------------------------------------------------------------------------------------------------------------------------------------------------------------------------------------------------------------------------------------------------------------------------------------------------------------------------------------------------------------------------------------------------------------------------------------------------------------------------------------------------------------------------------------------------------------------------------------------------------------------------------------------------------------------------------------------|
| Journal:                        | <i>BMJ Open</i>                                                                                                                                                                                                                                                                                                                                                                                                                                                                                                                                                                                                                                                                                  |
| Manuscript ID                   | bmjopen-2018-026575.R4                                                                                                                                                                                                                                                                                                                                                                                                                                                                                                                                                                                                                                                                           |
| Article Type:                   | Original research                                                                                                                                                                                                                                                                                                                                                                                                                                                                                                                                                                                                                                                                                |
| Date Submitted by the Author:   | 16-Sep-2019                                                                                                                                                                                                                                                                                                                                                                                                                                                                                                                                                                                                                                                                                      |
| Complete List of Authors:       | Lee, Jun Yang; Monash University - Malaysia Campus, School of Pharmacy; SEGi University Kota Damansara<br>Chan, Carina; La Trobe University College of Science Health and Engineering<br>Chua, Siew Siang; Taylor's University - Lakeside Campus, School of Pharmacy<br>Paraidathathu, Thomas; Taylor's University - Lakeside Campus, School of Pharmacy<br>Lee, Kenneth Kwing-Chin; Monash University - Malaysia Campus, School of Pharmacy<br>Tan, Christina; HELP International Corporation Bhd<br>Nasir, Nazrila; Kementerian Kesihatan Malaysia<br>Lee, Shaun Wen Huey ; Monash University - Malaysia Campus, School of Pharmacy; Taylor's University - Lakeside Campus, School of Pharmacy |
| <b>Primary Subject Heading</b>: | Diabetes and endocrinology                                                                                                                                                                                                                                                                                                                                                                                                                                                                                                                                                                                                                                                                       |
| Secondary Subject Heading:      | Health informatics, Health services research, Patient-centred medicine, Qualitative research                                                                                                                                                                                                                                                                                                                                                                                                                                                                                                                                                                                                     |
| Keywords:                       | General diabetes < DIABETES & ENDOCRINOLOGY, QUALITATIVE RESEARCH, Telemedicine < BIOTECHNOLOGY & BIOINFORMATICS                                                                                                                                                                                                                                                                                                                                                                                                                                                                                                                                                                                 |
|                                 |                                                                                                                                                                                                                                                                                                                                                                                                                                                                                                                                                                                                                                                                                                  |

SCHOLARONE™  
Manuscripts

1  
2  
3  
4  
5 **Using telemedicine to support care for people with type 2 diabetes mellitus: A**  
6 **qualitative analysis of patients' perspectives.**  
7  
8  
9

10  
11  
12 Short running title: Patients' perspective of telemedicine  
13  
14

15  
16 <sup>1</sup>Jun Yang LEE <sup>2</sup>Carina Ka Yee CHAN, <sup>3</sup>Siew Siang CHUA, <sup>3</sup>Thomas  
17  
18 PARAIIDATHATHU, <sup>1</sup>Kenneth Kwing-Chin LEE, <sup>4</sup>Christina San San TAN, <sup>5</sup>Nazrila  
19  
20 NASIR, <sup>1,3,6</sup>Shaun Wen Huey LEE  
21  
22

23  
24  
25  
26 <sup>1</sup>School of Pharmacy, Monash University Malaysia, Jalan Lagoon Selatan, Bandar  
27  
28 Sunway, 47500, Subang Jaya, Selangor, Malaysia.  
29

30  
31 <sup>2</sup> School of Psychology and Public Health, College of Science, Health and  
32  
33 Engineering, La Trobe University, Australia.  
34

35  
36 <sup>3</sup>School of Pharmacy, Faculty of Health and Medical Sciences, Taylor's University,  
37  
38 47500 Subang Jaya, Selangor, Malaysia.  
39

40  
41 <sup>4</sup>Centre for Pre-University Studies, HELP College of Arts and Technology, Kuala  
42  
43 Lumpur, Malaysia.  
44

45  
46 <sup>5</sup>Klinik Kesihatan Putrajaya, Putrajaya, Malaysia.  
47

48  
49 <sup>6</sup>Asian Centre for Evidence Synthesis in Population, Implementation and Clinical  
50  
51 Outcomes (PICO), Health and Well-being Cluster, Global Asia in the 21st Century  
52  
53 (GA21) Platform, Monash University Malaysia, Bandar Sunway, Selangor Malaysia  
54

55  
56 *Corresponding author and person in who reprint request should be addressed to*  
57

58  
59 Shaun Lee Wen Huey  
60

1  
2  
3 School of Pharmacy  
4

5 Monash University Malaysia  
6

7 Jalan Lagoon Selatan,  
8

9  
10 47500 Bandar Sunway,  
11

12 Selangor Darul Ehsan,  
13

14 Malaysia.  
15

16 Telephone: +60 3 5514 5890  
17

18 Fax: +60 3 5514 6364  
19

20 Email: [shaun.lee@monash.edu](mailto:shaun.lee@monash.edu)  
21  
22

23  
24  
25  
26 Keywords: telemedicine; qualitative; patient perspective; barriers; diabetes  
27  
28

29  
30 Word count: 3,758 words  
31  
32  
33  
34  
35  
36  
37  
38  
39  
40  
41  
42  
43  
44  
45  
46  
47  
48  
49  
50  
51  
52  
53  
54  
55  
56  
57  
58  
59  
60

## Abstract

**Objective:** Telemedicine has been promoted as an economical and effective way to enhance patient care, but its acceptance among patients in low and middle income countries is poorly understood. This study is aimed to explore the experiences and perspectives of people with type 2 diabetes mellitus that used telemedicine to manage their condition.

**Design:** In-depth and focus group interviews were conducted with participants who have engaged in telemedicine. Questions included were participants' perception on the programme being used, satisfaction as well as engagement with the telemedicine programme. All interviews and focus groups were audio-recorded and transcribed verbatim. Data were analyzed using a thematic approach.

**Participants and setting:** People with type 2 diabetes ( $n=48$ ) who participated in a randomized controlled study which examined the use of telemedicine for diabetes management were recruited from eleven primary care clinics located within the Klang Valley.

**Results:** Twelve focus groups and two in-depth interviews were conducted. Four themes emerged from the analysis: (1) Generational difference; (2) Independence and convenience, (3) Sharing of health data and privacy; and (4) Concerns and challenges. The main obstacles found in patients using the telemedicine systems were related to internet connectivity and difficulties experienced with system interface. Cost was also another significant concern raised by participants. Participants in this study were primarily positive about the benefits of telemedicine, including its ability to provide real time data and disease monitoring and the reduction in clinic visits.

1  
2  
3 **Conclusion:** Despite the potential benefits of telemedicine in the long term care of  
4 diabetes, there are several perceived barriers that may limit the effectiveness of this  
5 technology. As such, collaboration between educators, health care providers,  
6 telecommunication service providers and patients are required to stimulate the  
7 adoption and the use of telemedicine.  
8  
9  
10  
11  
12  
13  
14  
15  
16  
17  
18  
19  
20  
21  
22  
23  
24  
25  
26  
27  
28  
29  
30  
31  
32  
33  
34  
35  
36  
37  
38  
39  
40  
41  
42  
43  
44  
45  
46  
47  
48  
49  
50  
51  
52  
53  
54  
55  
56  
57  
58  
59  
60

For peer review only



### Strengths and limitations of this study

- The study followed the Standards for Reporting Qualitative Research (SRQR) recommendations
- Focus group discussion allowed for the exchange of opinions relating to the use of telemedicine
- The views and experiences with telemedicine were documented from the patients' perspectives instead of the healthcare providers' perspective
- The study was conducted in an urban setting in Malaysia. The implications related to other populations is unknown.

## Introduction

Diabetes is a major health concern worldwide with a global prevalence of 415 million in 2015 rising to 642 million in 2040.<sup>1</sup> The prevalence of diabetes varies considerably between different global regions, but the epicentre of the disease is currently in the Western Pacific and South-East Asia regions, with 159 million and 82 million individuals with diabetes respectively.<sup>2</sup> Self-monitoring of blood glucose (SMBG) is considered to be a key component in the treatment of diabetes, and is widely recommended in clinical practice guidelines, irrespective of subsequent treatment strategy.<sup>3-7</sup> SMBG is often used as an early indicator for detecting hypoglycaemia, monitoring severe hyperglycaemia and encouraging physical activity as well as improving diet control. The long term individualised patient data are often used to inform treatment regimens.<sup>8</sup>

Despite these potential benefits, there is controversy regarding the efficacy of SMBG, especially in non-insulin dependent type 2 diabetes, due to its cost, uncertainty with frequency of testing as well as the impact on patient's general health and well-being.<sup>9-11</sup> Studies have shown that the use of enhanced SMBG (where there are high levels of engagement between patients and clinicians when interpreting a patient's SMBG values) has resulted in better maintenance of glycated haemoglobin (HbA1c) levels when compared to regular SMBG.<sup>4 12-14</sup>

The application of telemedicine in delivering various aspects of health information, from the information on the prevention of disease, to the monitoring of medical conditions as well as regular medical care for diabetes management has been

1  
2  
3 suggested as an innovative solution to improve diabetic patient care.<sup>15-17</sup> Telemedicine  
4 is being viewed as a useful tool to assist patients in managing diabetes,<sup>16 18 19</sup> as it  
5 facilitates the communication of accurate and reliable data<sup>20</sup> between patients and  
6 their healthcare providers. It also empowers patients<sup>15</sup> attitude and behavior<sup>19 21</sup>  
7 towards a healthier lifestyle while providing them with an outlook for better glycaemic  
8 control.<sup>22</sup> These telemedicine services can be categorized into either synchronous  
9 (real-time), asynchronous (whereby data is stored and forwarded subsequently) and  
10 continuous (remote monitoring). In diabetes care, various forms of telemedicine  
11 services have been examined. These include the use of mobile phones, text  
12 messages, email, e-health portals, videoconferences as well as remote monitoring  
13 devices.  
14  
15  
16  
17  
18  
19  
20  
21  
22  
23  
24  
25  
26  
27  
28  
29  
30

31 Implementation of a telemedicine service in conventional care is a complex process.  
32 While evidence has shown that telemedicine may expand the boundaries of  
33 healthcare to a larger population and may offer person-centred care,<sup>23</sup> there are still  
34 examples where patients' resist these changes.<sup>24 25</sup> One of the major limitations of  
35 existing literature is the lack of studies which have examined the perspectives of  
36 patients in low to middle income countries such as Malaysia, where telemedicine is  
37 now being used. Earlier published work on this topic has focused primarily on the  
38 views of physicians rather than the patient's perspective.<sup>26 27</sup> There was a limited  
39 understanding of the key factors faced by patients using telemedicine as most of these  
40 studies have focused primarily on its utilization rates.<sup>25 28</sup> Furthermore, very little is  
41 known as to how empirically supported interventions can be transferred or  
42 implemented in resource-constrained countries, i.e., in most developing countries.  
43  
44  
45  
46  
47  
48  
49  
50  
51  
52  
53  
54  
55  
56  
57  
58  
59  
60

1  
2  
3 Understanding the behaviour among various levels of stakeholders is an important  
4  
5 component of successful implementation research.<sup>29</sup>  
6  
7  
8  
9  
10

11  
12 As patients' experience with telemedicine may be a major reason in determining the  
13  
14 uptake of this system, we conducted a qualitative study to explore patients' views and  
15  
16 experiences of telemedicine for diabetes management in Malaysia. The study focused  
17  
18 on the patient's ' perspective in context which was necessary to ensure the successful  
19  
20 delivery and implementation of a telemedicine programme for diabetes.  
21  
22  
23  
24  
25  
26  
27  
28  
29  
30  
31  
32  
33  
34  
35  
36  
37  
38  
39  
40  
41  
42  
43  
44  
45  
46  
47  
48  
49  
50  
51  
52  
53  
54  
55  
56  
57  
58  
59  
60

## Materials and Methods

### Study design

The present qualitative study was part of a larger multi-centre cluster randomized controlled study (IDEAS) conducted between April 2015 and June 2017, which examined the impact of a telemedicine programme for people with type 2 diabetes (Box 1).<sup>30 31</sup> This nested study design allowed the investigators to explore the perceived obstacles and incentives patients experienced when using telemedicine in the management of their type 2 diabetes.

### Participants and Setting

Participants were recruited from 11 primary care clinics located within the Klang Valley, which is part of the Malaysian Ministry of Health's primary care clinic network. These clinics serve the districts of Klang and Petaling, which provide care for approximately 2.56 million individuals. These individuals are considered to be representative of primary care clinics in Malaysia.

This qualitative study adopted a non-probability sampling method, where sampling was not guided by the idea of random selection or statistical representation. Nevertheless, we aimed to cover as broad a spectrum of participants who had experienced using telemedicine. We invited participants who had completed the IDEAS study to participate in the current qualitative study. Participants included those who: 1) had been diagnosed with type 2 diabetes for at least 6 months; 2) aged

1  
2  
3 between 18-75 years; 3) had regular access to the Internet; 4) had HbA1c levels  
4  
5 between 7.5% and 11.0%; and 5) were randomized into the intervention arm of the  
6  
7 IDEAS study<sup>30 31</sup>. Participants were excluded if they had no experience in using  
8  
9 telemedicine devices or had dropped out of the IDEAS study<sup>31</sup>. All potentially eligible  
10  
11 participants were contacted by telephone and invited to participate in the study.  
12  
13 Participants were briefed on the purpose, procedure and voluntary nature of the study  
14  
15 and were allowed to clarify their concerns. A separate information sheet was given to  
16  
17 the participants and written informed consent was obtained prior to the start of the  
18  
19 study. To accommodate participants' schedules, all focus group interviews were  
20  
21 conducted when participants visited the clinics for their follow-up sessions (at weeks  
22  
23 4, 12, 24 or 48) with their physicians. In the event a participant was not able to attend a  
24  
25 focus group session, an individual in-depth interview was conducted at their home.  
26  
27 Study participants were given a RM50 (approximately USD\$12) voucher for their  
28  
29 participation.  
30  
31  
32  
33  
34  
35  
36  
37

### 38 **Interview schedule**

39  
40  
41  
42 A semi-structured interview was used in all the focus groups, and this was based on  
43  
44 the topic areas and key questions outlined in Table 1. The topic guide aimed to capture  
45  
46 the experiences of patients in using telemedicine and was developed based on  
47  
48 relevant literature.<sup>11 13 24</sup>  
49  
50  
51  
52

53  
54 The interviews were facilitated by the first author (JYL) and conducted either in Malay  
55  
56 or English. Each interview lasted between 35 and 44 minutes in a private room in the  
57  
58 clinic. All interview sessions were digitally recorded, transcribed verbatim immediately  
59  
60

1  
2  
3 after each interview and checked for accuracy by SWHL. Interviews were conducted  
4  
5 to explore for emerging themes with simultaneous analysis of data until data saturation  
6  
7 was achieved, when no new themes or codes were identified.  
8  
9

## 10 11 12 **Data analysis**

13  
14 The NVivo software version 11 (QSR International Pty Ltd) was used to organize and  
15  
16 code the data for thematic analysis, using both an inductive and deductive approach.<sup>32</sup>  
17  
18 All transcripts were read several times to familiarize with the data. Transcripts were  
19  
20 translated from Malay language to English by an independent research assistant. The  
21  
22 translated English transcripts were double checked by the first author (JYL) and any  
23  
24 discrepancies were resolved via discussion with another author (SWHL). Firstly,  
25  
26 transcripts were coded into an initial set of themes based on keywords or phrases that  
27  
28 appeared to convey an opinion or perception regarding telemedicine guided by  
29  
30 themes identified from previous literature<sup>11 13 24</sup>. These initial codes were further  
31  
32 examined and refined, with codes combined to be main themes if they had similar  
33  
34 contexts or split into subthemes via an inductive process. The final codes were  
35  
36 summarized, cross checked and iteratively refined using paired analysis of transcripts  
37  
38 by two researchers (JYL and SWHL). In the event that there was a divergent  
39  
40 interpretation, the transcripts were reviewed again and discussed until consensus was  
41  
42 achieved.  
43  
44  
45  
46  
47  
48  
49  
50

## 51 **Ethics**

52  
53 The study was approved by the Monash University Research Ethics Committee  
54  
55 (CF14/1977 – 2014001016 & CF15/1073 - 2015000502) and the National Medical  
56  
57 Research Register (NMRR-14-177-19466 & NMRR-14-1368-22943). All participants  
58  
59  
60

1  
2  
3 provided written informed consent for participation in the research. This study was  
4  
5 registered with ClinicalTrials.gov under the registration NCT0246680.  
6  
7  
8  
9

### 10 **Patient and public involvement**

11  
12 The current study was designed to understand patients' views, perceptions and  
13  
14 experiences in using telemedicine for type 2 diabetes management. Patients were  
15  
16 not involved in the initial design of the study, development of interview questions or  
17  
18 conduct of the study. All participants in this qualitative study were not provided with  
19  
20 the results but were informed that the results will be published in a peer-reviewed  
21  
22 journal.  
23  
24  
25  
26  
27  
28  
29  
30  
31  
32  
33  
34  
35  
36  
37  
38  
39  
40  
41  
42  
43  
44  
45  
46  
47  
48  
49  
50  
51  
52  
53  
54  
55  
56  
57  
58  
59  
60



## Results

### Demographics of participants

A total of 48 participants were interviewed in 12 focus group and two interview sessions. Each focus group had an average of between 3-4 participants, as we had difficulty arranging for larger groups due to different timing of clinic visits. The participants were mostly females (56.3%), with a mean age of 51.9 years, and have had diabetes for 5.6 years on average (Table 2). Four core themes emerged from the focus groups and the two in-depth interviews: (1) Generational difference (2) Independence and convenience, (3) Sharing of health data and privacy; and (4) Concerns and challenges.

#### Theme 1 – Generational differences

Our data suggests that there were generational differences with regards to participants' preference on how to record their blood glucose reading. Generally, older participants in this study (those aged 50 years and above) preferred to record their glucose readings manually, using pen and paper. They felt that the telemonitoring device required technical knowledge and was a challenging and complex process for them. As narrated by the participants:

“I (prefer to) manually record (my blood glucose readings). I do not understand (how to operate the mobile) telephone especially operating (the software). To me manual (recording) is easier.” [Patient 4, 59/F]

1  
2  
3 “But I am an old lady. I like it (blood glucose results) to be written (down). I'm  
4 old (and) I need to write (the results) down. Anyway, as long as someone  
5 shows me how to do it, I can do it. Of course (using telemedicine) is easier  
6 because you bring your hand phone everywhere you go.” [Patient 5, 57/F]  
7  
8  
9  
10  
11  
12  
13

14 These participants felt that the use of telemedicine was more suited for younger  
15 individuals with diabetes who were more familiar with technology utilisation. As  
16 explained by one participant, “Maybe for the young ones. Technology (is) for  
17 youngsters (and) is more suitable since they like to sit at home and like the thing called  
18 Internet.” [Patient 41, 67/M]  
19  
20  
21  
22  
23  
24  
25  
26  
27

28 Some participants also expressed their preference to meet their health care providers  
29 in person and reported that travelling to the clinic was preferred.  
30  
31  
32  
33  
34

35 “I don't mind coming to the clinic and have a chat with the doctor. We (can)  
36 discuss (my medical condition) and sometimes we can ask questions and  
37 doctors can show (my problem to me) physically. For me to use the Internet  
38 is difficult to learn (as) my children are not here.” [Patient 6, 60/M]  
39  
40  
41  
42  
43  
44  
45  
46

47 Conversely, younger participants were more inclined to learn and use new  
48 technologies if sufficient training and guidance were given. Additionally, they were  
49 optimistic about using telemedicine to manage their conditions, as they knew the  
50 various benefits that technology would provide, including the data analytics ability and  
51 convenience.  
52  
53  
54  
55  
56  
57  
58  
59  
60

## Theme 2 – Independence and convenience

Participants expressed that the use of a mobile phone connected to a glucometer was a convenient method that contributed to the improved management of their diabetes. Participants considered this to be a convenience when time constraints or logistical issues prevented them from attending the clinic for their appointment. Participants also mentioned that having a telemonitoring device encouraged them to monitor their glucose levels regularly compared to the quarterly check-ups at the clinic. As expressed by participants:

“It’s good to use especially over the Internet. It’s so much easier we do not have to come to the clinic and can stay at home” [Patient 12, 60/M].

“Digital way (is the preferred choice). Everyday you can see (your blood glucose results) in the software so (there is) no need to record like manual. Sometimes even you record manual the paper will go wherever (or) missing. (Using) digital you have a backup.” [Patient 8, 35/F]

“I like this because you can transfer (your blood glucose results) directly to your phone. It’s useful to me as an indication. I prefer (using technology so) that I can use it to check how my medicine affects my glucose. I think that this is the best tools because you can monitor by the Internet everywhere you go.” [Patient 9, 44/M]

1  
2  
3 “It’s even more convenient since we do not have the time to come (to  
4 the clinic) and sometimes some people do not have transport.” [Patient  
5  
6  
7  
8 10, 44/F]  
9

10  
11  
12 Most participants were generally enthusiastic as they saw the potential benefits of  
13 telemedicine. Participants described how the use of a web-based glucometer was  
14 useful as it could provide them with reminders and alerts as well as the ability to  
15 connect with their healthcare providers without going to the clinic. Nevertheless, they  
16 expressed the desire and need to have more training and assistance, especially when  
17 they had not used the device for some time, since they would have forgotten the  
18 functions on the device.  
19  
20  
21  
22  
23  
24  
25  
26  
27  
28  
29

30  
31 “For me it’s not difficult ... just need to teach (me) that’s all. See the learning  
32 condition first (and perhaps I need more training), maybe need two or three  
33 times. I’m over fifty (years old) so (the) first time will be a problem .....need  
34 to teach a few times before I understand. First time might be difficult to  
35 understand” [Patient 7, 56/M].  
36  
37  
38  
39  
40  
41  
42  
43  
44  
45  
46  
47  
48

### 49 **Theme 3 – Sharing health data and privacy**

50  
51  
52

53 Our analysis showed that there were conflicting perspectives with data sharing.  
54  
55 Several participants expressed that they were willing to share their monitoring results  
56  
57  
58  
59  
60

1  
2  
3 with family members, as they felt accountable for their diabetes management, which  
4  
5 was a significant motivation for them to meet their daily goals.  
6  
7  
8  
9

10 “The use of this what you call it (web-telemonitor)..... (I feel) my health  
11  
12 is better since my family members (also) monitor (my) sugar levels as  
13  
14 well” [Patient 11, 54/F].  
15  
16  
17  
18

19 “The good part (of telemedicine is) you can do it at home. If (you check  
20  
21 your blood glucose levels) at the clinic you get pricked (but) nobody  
22  
23 knows (the results)... but when you do it at home you children will be  
24  
25 informed as well” [Patient 5, 57/F].  
26  
27  
28  
29  
30  
31  
32

33 Conversely, some participants expressed concern with the sharing of medical  
34  
35 information with their family members, whereby they felt that their privacy was  
36  
37 infringed and could potentially lead to conflicts between family members.  
38  
39  
40  
41

42 “That thing (Telemonitoring device) is okay (to use) but what I am afraid of is  
43  
44 (that the use of telemonitoring may) sometimes (cause) conflicts because it  
45  
46 feels like you are being monitored by others. But it is beneficial, at least there  
47  
48 is somebody remind you” [Patient 1, 45/M].  
49  
50  
51  
52

53 Participants also expressed concern about the presence of malware in  
54  
55 telemonitoring devices that could compromise their personal information.  
56  
57  
58  
59  
60

1  
2  
3 “(What happens when we have a) problem with the Internet (connection).  
4  
5 Occasionally we (may) receive the reading, but occasionally (we will be) unable  
6  
7 to (do so). (This can be) very inconvenient” [Patient 11, 54/F].  
8  
9

10  
11  
12  
13  
14  
15 Some participants felt that meeting or contacting their health care providers was a  
16  
17 simpler and faster way to solve their queries as the health care practitioner would be  
18  
19 able to explain their clinical measures in a more concise manner. As explained by  
20  
21 one participant “Face-to face (consultation) is more important (as) its better. (With)  
22  
23 face-to face (consultation), information is clearer and more satisfying to me.” [Patient  
24  
25 2, 67F].  
26  
27  
28  
29

#### 30 **Theme 4 – Concerns and challenges**

31  
32  
33  
34  
35 Participants in this study emphasized the importance of having a user-friendly  
36  
37 technology. Most participants in this study reported minor technical difficulties  
38  
39 especially with internet connectivity and availability in rural areas, which limited their  
40  
41 ability to utilize the telemonitoring device effectively. Participants also expressed  
42  
43 concerns regarding the stability of internet connection at their homes.  
44  
45  
46  
47  
48

49 “I think depending on the situation.. whether you live in a village where (I feel)  
50  
51 it will be very difficult..... because (in) certain villages you don't have (Internet)  
52  
53 line so you (will) still need have (to record the blood glucose results) manually”  
54  
55 [Patient 8, 35/F].  
56  
57  
58  
59  
60

1  
2  
3 Participants suggested the need to have a robust system which is user-friendly, with  
4  
5 good technical support which they felt were essential to ensure the successful  
6  
7 implementation of telemedicine.  
8  
9

10  
11  
12 “Okay but what happens when there is a virus? It is a problem for one week my  
13  
14 handphone “hang”. After one week it hangs (again)...that is a problem” [Patient  
15  
16 13, 54/F].  
17  
18

19  
20  
21 Another aspect which participants were worried of was the costs involved compared  
22  
23 to conventional care and that telemonitoring would only be suitable for affluent  
24  
25 patients.  
26  
27

28  
29  
30 “All this (telemedicine) is for people who are wealthy. Of course this is a good  
31  
32 system.” [Patient 14, 63/M]  
33  
34  
35  
36  
37  
38  
39  
40  
41  
42  
43  
44  
45  
46  
47  
48  
49  
50  
51  
52  
53  
54  
55  
56  
57  
58  
59  
60

## Discussion

In our study, we present the conditions in the success of a telemonitoring health device for managing type 2 diabetes from the perspectives of patients. We identified a set of distinctive but interrelated conditions which were and would be central to the success of such programmes in the context of a developing country. Firstly, participants' age were crucial in ensuring the success of telemedicine. We noted that younger participants between the ages of 29 and 50 years old preferred to use a web-based glucometer compared to older participants (aged 50 and above) who preferred to record their results manually. This outcome is not surprising, as younger individuals are more familiar with technology and its use. This was noted in the IDEAS study where the average SMBG uploads were only one reading per week instead of the recommended six readings a week.<sup>31</sup> Participants cited various reasons for being not being able to use a web-based glucometer. These included the lack of internet connectivity especially in the rural areas. Concerns about the stability of internet connections were the main barrier in using telemedicine in the management of diabetes in this study. The need for a simple, user friendly technology was also consistently highlighted in order to encourage acceptance and adoption among participants on the use of a remote telemonitoring system.

Participants expressed enthusiasm with the potential added value of telemedicine with to their medical conditions. The perceived benefits of telemedicine included the ability to receive alerts, access to SMBG readings with advice from a health care professional; as well as reduced cost on their treatments. Most participants were willing to incorporate technology as part of their diabetes management, but only if they



1  
2  
3 were confident in using the device or if they could seek help and support easily. Our  
4  
5 results support previous research which indicated that personal interaction with health  
6  
7 care practitioners was important to support people with type 2 diabetes, especially  
8  
9 when it involved SMBG.<sup>15 33</sup> These views were also expressed by most participants in  
10  
11 the present study, and the lack of clinical support especially when communicating  
12  
13 through remote telemonitoring led to participants dropping out of the study.  
14  
15  
16  
17  
18

19 Living with diabetes can be difficult, especially with the need to comply with a  
20  
21 demanding and often confusing set of self-care directives. Many individuals encounter  
22  
23 diabetes-related conflicts with family members, which results in strained relationships.  
24  
25 As noted in this study, some participants expressed reservation on the feedback and  
26  
27 monitoring features of the telemonitoring device, as they felt that the device intruded  
28  
29 into their privacy, as well as gave them the feeling of being “watched”. Consequently,  
30  
31 some patients opted not to participate in the IDEAS<sup>30</sup> randomized controlled trial. The  
32  
33 findings of this study identified several salient issues which are reflected in the  
34  
35 literature. For example, many others noted that patients accepted telemedicine due to  
36  
37 its ability to reduce travel time<sup>34-36</sup>, increase self-awareness<sup>37 38</sup> and increase access  
38  
39 to care<sup>39 40</sup>.  
40  
41  
42  
43  
44  
45  
46

47 The present study also found several additional barriers that have not been reported  
48  
49 in previous literature, such as conflict between operational practicality versus patient’s  
50  
51 privacy and healthcare data security. As privacy and security risk may undermine the  
52  
53 potential of telemedicine, it is important that software developers must consider this  
54  
55 aspect as information security is crucial to support a trusting relationship between  
56  
57 patients and providers. Therefore, collaboration with researchers in the field of  
58  
59  
60

1  
2  
3 cybersecurity, especially those specializing in network security and cryptography is  
4  
5 necessary.  
6  
7  
8  
9  
10

11  
12 Our study offers several strengths. By exploring the insights of patients, we illustrate  
13 how family values and technology literacy could influence participants' opinions on the  
14 use of telemonitoring in their medical condition. This method also allowed us to gain  
15 an in-depth understanding and broader views of participants' behaviour when  
16 managing diabetes. Our study was also culturally specific in an Asian context.  
17  
18  
19  
20  
21  
22  
23  
24  
25  
26  
27

28 There were some limitations to our study. Firstly, although we included a diverse  
29 sample of participants and reached thematic saturation in our focus groups and in-  
30 depth interviews, these participants were only limited to one geographical location in  
31 Malaysia. Participants in this current study were recruited from suburban districts in  
32 Selangor where connectivity and technology literacy were moderate. Future studies  
33 should include patients from both urban and rural locations and also include  
34 participants with high technology literacy, as this could potentially influence the uptake  
35 and acceptability of telemedicine. While published literature suggests that these trends  
36 are likely to be transferable to other regions in Malaysia, the context may differ in other  
37 countries and settings. The views expressed here are solely from the patients' and  
38 do not represent the views of health care providers or policymakers. Finally, our  
39 results cannot draw a definitive conclusion regarding differences in provider practices,  
40 patient knowledge as well as attitudes from different clinic sites other than those  
41 examined in this study.  
42  
43  
44  
45  
46  
47  
48  
49  
50  
51  
52  
53  
54  
55  
56  
57  
58  
59  
60

## Implications for practice

The continued development and improvement in healthcare technology will hopefully facilitate the use of telemedicine in the future. The largest potential use of telemedicine will be its ability to reduce logistical barriers and hence save time. However, before any telemedicine programs are introduced, there is a need to consider the economic standing of patients and their access to technology. Those living in rural areas may have limited internet connectivity and hence efforts must be made to ensure that the expectations of patients are met. Also, there is a need to invest in capacity building, especially in human resource. Specifically, the creation of training programs on the use of telemedicine for both the general public and health care workers, are particularly important, especially among the non-IT competent groups of users.

## Conclusion

Results from this study indicate that the implementation of telemonitoring in diabetes management requires strategic planning with input from various stakeholders including, educators, health care providers, telecom service providers and patients. The patient's personal and contextual factors, which could have a positive or negative effect on the uptake of the service should be taken into consideration. As such, health care providers need to discuss and consider the perspective of their patients to ensure the optimal use of telemedicine to improve patients' clinical parameters and quality of life.

## Acknowledgements

The authors would like to thank all participants and health care providers who contributed their time to share their perspectives with us. We also wish to thank Drs Chirk Jenn Ng and Chee Piau Wong for helping to edit the article, Chan Yan Yew from USA and Dr Alan Worsley from Hong Kong University for helping with the English edits of this manuscript

## Funding source

This study was supported by the e-Science fund from the Ministry of Science, Technology and Innovation, Malaysia [03-02-10-SF0238 (MOSTI)], Telemedicine Cluster, Tropical Medicine and Biology platform, Monash University Malaysia (52140757-314-00) and SEGi University Research Fund (SEGi/2013/SKK/04/1).

## Author Disclosure Statement

The authors report no conflict of interest.

## Author Contributions

All authors named contributed substantially to the document. JYL conducted and transcribed the interview, interpreted the results and wrote the draft manuscript. SWHL obtained the funding, designed the study and provided support in editing the manuscript. CKYC, SSC, TP, KKCL, NHN and CSST contributed to the study design and critical review of the manuscript. All authors approved the final version.

## Data sharing statement

1  
2  
3 All data generated or analyzed during this study are included in this published  
4 article. They can be made available from the corresponding author on  
5 reasonable request.  
6  
7  
8  
9  
10  
11  
12  
13  
14  
15  
16  
17  
18  
19  
20  
21  
22  
23  
24  
25  
26  
27  
28  
29  
30  
31  
32  
33  
34  
35  
36  
37  
38  
39  
40  
41  
42  
43  
44  
45  
46  
47  
48  
49  
50  
51  
52  
53  
54  
55  
56  
57  
58  
59  
60

For peer review only

## References

1. Ogurtsova K, da Rocha Fernandes JD, Huang Y, et al. IDF Diabetes Atlas: Global estimates for the prevalence of diabetes for 2015 and 2040. *Diabetes Research and Clinical Practice* 2017;128:40-50. doi: 10.1016/j.diabres.2017.03.024
2. International Diabetes Federation. IDF Diabetes Atlas. 8th ed. Brussels, Belgium: International Diabetes Federation 2017.
3. American Diabetes Association. 5. Glycemic Targets. *Diabetes Care* 2016;39(Supplement 1):S39-S46. doi: 10.2337/dc16-S008
4. Farmer AJ, Perera R, Ward A, et al. Meta-analysis of individual patient data in randomised trials of self monitoring of blood glucose in people with non-insulin treated type 2 diabetes. *BMJ* 2012;344 doi: 10.1136/bmj.e486
5. Malanda UL, Welschen LMC, Riphagen II, et al. Self-monitoring of blood glucose in patients with type 2 diabetes mellitus who are not using insulin. *Cochrane Database of Systematic Reviews* 2012(1) doi: 10.1002/14651858.CD005060.pub3
6. Schnell O, Barnard K, Bergenstal R, et al. Clinical Utility of SMBG: Recommendations on the Use and Reporting of SMBG in Clinical Research. *Diabetes Care* 2015;38(9):1627. doi: 10.2337/dc14-2919
7. Machry RV, Rados DV, Gregório GRd, et al. Self-monitoring blood glucose improves glycemic control in type 2 diabetes without intensive treatment: A systematic review and meta-analysis. *Diabetes Research and Clinical Practice* 2018;142:173-87. doi: <https://doi.org/10.1016/j.diabres.2018.05.037>
8. Chakranon P, Yin Key L, Yee Woon T, et al. Distal technology interventions in people with diabetes: an umbrella review of multiple health outcome. *Diabet Med* 2019:Accepted, in press.
9. Zhu H, Zhu Y, Leung S-w. Is self-monitoring of blood glucose effective in improving glycaemic control in type 2 diabetes without insulin treatment: a meta-analysis of randomised controlled trials. *BMJ Open* 2016;6(9):e010524. doi: 10.1136/bmjopen-2015-010524
10. Cox DJ, Gonder-Frederick L, Ritterband L, et al. Prediction of Severe Hypoglycemia. *Diabetes Care* 2007;30(6):1370. doi: 10.2337/dc06-1386
11. Malanda UL, Bot SD, Nijpels G. Self-monitoring of blood glucose in noninsulin-using type 2 diabetic patients. *Diabetes Care* 2013;36(1):176. doi: 10.2337/dc12-0831
12. Lee SWH, Ooi L, Lai YK. Telemedicine for the Management of Glycemic Control and Clinical Outcomes of Type 1 Diabetes Mellitus: A Systematic Review and Meta-Analysis of Randomized Controlled Studies. *Frontiers in Pharmacology* 2017;8:330. doi: 10.3389/fphar.2017.00330
13. Polonsky WH, Fisher L, Schikman CH, et al. Structured self-monitoring of blood glucose significantly reduces A1C levels in poorly controlled, noninsulin-treated type 2 diabetes: Results from the structured testing program study. *Diabetes Care* 2011;34(2):262-67. doi: 10.2337/dc10-1732
14. Fisher L, Polonsky WH, Parkin CG, et al. The impact of structured blood glucose testing on attitudes toward self-management among poorly controlled, insulin-naive patients with type 2 diabetes. *Diabetes Research and Clinical Practice* 2012;96(2):149-55. doi: 10.1016/j.diabres.2011.12.016

15. Lee JY, Lee SWH, Nasir NH, et al. Diabetes telemonitoring reduces the risk of hypoglycaemia during Ramadan: a pilot randomized controlled study. *Diabetic Medicine* 2015;32(12):1658-61. doi: 10.1111/dme.12836
16. Lee JY, Wong CP, Tan CSS, et al. Telemonitoring in fasting individuals with Type 2 Diabetes Mellitus during Ramadan: A prospective, randomised controlled study. *Scientific Reports* 2017;7(1):10119. doi: 10.1038/s41598-017-10564-y
17. Lee SWH, Lee JY, San San Tan C, et al. Strategies to make Ramadan fasting safer in type 2 diabetics: a systematic review and network meta-analysis of randomized controlled trials and observational studies. *Medicine* 2016;95(2)
18. Paré G, Jaana M, Sicotte C. Systematic Review of Home Telemonitoring for Chronic Diseases: The Evidence Base. *Journal of the American Medical Informatics Association : JAMIA* 2007;14(3):269-77. doi: 10.1197/jamia.M2270
19. Pare G, Moqadem K, Pineau G, et al. Clinical effects of home telemonitoring in the context of diabetes, asthma, heart failure and hypertension: a systematic review. *J Med Internet Res* 2010;12(2):e21. doi: 10.2196/jmir.1357 [published Online First: 2010/06/18]
20. Hernandez C, Casas A, Escarrabill J, et al. Home hospitalisation of exacerbated chronic obstructive pulmonary disease patients. *European Respiratory Journal* 2003;21(1):58. doi: 10.1183/09031936.03.00015603
21. Lee SWH, Chan CKY, Chua SS, et al. Comparative effectiveness of telemedicine strategies on type 2 diabetes management: A systematic review and network meta-analysis. *Scientific Reports* 2017;7(1):12680. doi: 10.1038/s41598-017-12987-z
22. Jaana M, Pare G. Home telemonitoring of patients with diabetes: a systematic assessment of observed effects. *Journal of evaluation in clinical practice* 2007;13(2):242-53. doi: 10.1111/j.1365-2753.2006.00686.x [published Online First: 2007/03/24]
23. Heckemann B, Wolf A, Ali L, et al. Discovering untapped relationship potential with patients in telehealth: a qualitative interview study. *BMJ Open* 2016;6(3):e009750. doi: 10.1136/bmjopen-2015-009750
24. Scott Kruse C, Karem P, Shifflett K, et al. Evaluating barriers to adopting telemedicine worldwide: A systematic review. *Journal of telemedicine and telecare* 2018;24(1):4-12. doi: 10.1177/1357633X16674087 [published Online First: 10/16]
25. Kruse CS, Krowski N, Rodriguez B, et al. Telehealth and patient satisfaction: a systematic review and narrative analysis. *BMJ open* 2017;7(8):e016242-e42. doi: 10.1136/bmjopen-2017-016242
26. de Souza CHA, Morbeck RA, Steinman M, et al. Barriers and Benefits in Telemedicine Arising Between a High-Technology Hospital Service Provider and Remote Public Healthcare Units: A Qualitative Study in Brazil. *Telemedicine and e-Health* 2016;23(6):527-32. doi: 10.1089/tmj.2016.0158
27. Koivunen M, Saranto K. Nursing professionals' experiences of the facilitators and barriers to the use of telehealth applications: a systematic review of qualitative studies. *Scandinavian Journal of Caring Sciences* 2018;32(1):24-44. doi: 10.1111/scs.12445
28. Mair F, Whitten P. Systematic review of studies of patient satisfaction with telemedicine. *BMJ* 2000;320(7248):1517-20. doi: 10.1136/bmj.320.7248.1517
29. Chan CKY, Oldenburg B, Viswanath K. Advancing the Science of Dissemination and Implementation in Behavioral Medicine: Evidence and Progress. *International Journal of Behavioral Medicine* 2015;22(3):277-82. doi: 10.1007/s12529-015-9490-2



- 1  
2  
3  
4  
5  
6  
7  
8  
9  
10  
11  
12  
13  
14  
15  
16  
17  
18  
19  
20  
21  
22  
23  
24  
25  
26  
27  
28  
29  
30  
31  
32  
33  
34  
35  
36  
37  
38  
39  
40  
41  
42  
43  
44  
45  
46  
47  
48  
49  
50  
51  
52  
53  
54  
55  
56  
57  
58  
59  
60
30. Lee JY, Chan CKY, Chua SS, et al. Intervention for Diabetes with Education, Advancement and Support (IDEAS) study: protocol for a cluster randomised controlled trial. *BMC Health Services Research* 2016;16:524. doi: 10.1186/s12913-016-1782-y
  31. Lee JY, Chan CKY, Chua SS, et al. Telemonitoring and Team-based Management of Glycemic Control on People with Type 2 Diabetes: A Cluster Randomized Controlled Trial *Journal of General Internal Medicine* 2019:Accepted, In press. doi: 10.1007/s11606-019-05316-9
  32. Nowell LS, Norris JM, White DE, et al. Thematic Analysis: Striving to Meet the Trustworthiness Criteria. *International Journal of Qualitative Methods* 2017;16(1):1609406917733847. doi: 10.1177/1609406917733847
  33. Heisler M, Bouknight RR, Hayward RA, et al. The relative importance of physician communication, participatory decision making, and patient understanding in diabetes self-management. *Journal of general internal medicine* 2002;17(4):243-52.
  34. Müller KI, Alstadhaug KB, Bekkelund SI. Acceptability, Feasibility, and Cost of Telemedicine for Nonacute Headaches: A Randomized Study Comparing Video and Traditional Consultations. *Journal of medical Internet research* 2016;18(5):e140-e40. doi: 10.2196/jmir.5221
  35. Christensen NP, Danbjørg DB. Use of Video Consultations for Patients With Hematological Diseases From a Patient Perspective: Qualitative Study. *Journal of Participatory Medicine* 2018;10(4):e11089.
  36. Lee JY, Lee SWH. Is telemedicine cost effectiveness for diabetes management: A systematic review. *Diabetes Technology & Therapeutics* 2018;20(7):492-500.
  37. Piette JD, Marinec N, Gallegos-Cabrales EC, et al. Spanish-speaking patients' engagement in interactive voice response (IVR) support calls for chronic disease self-management: data from three countries. *Journal of telemedicine and telecare* 2013;19(2):89-94. doi: 10.1177/1357633X13476234 [published Online First: 03/26]
  38. Whitehead L, Seaton P. The Effectiveness of Self-Management Mobile Phone and Tablet Apps in Long-term Condition Management: A Systematic Review. *Journal of medical Internet research* 2016;18(5):e97-e97. doi: 10.2196/jmir.4883
  39. Polinski JM, Barker T, Gagliano N, et al. Patients' Satisfaction with and Preference for Telehealth Visits. *Journal of general internal medicine* 2016;31(3):269-75. doi: 10.1007/s11606-015-3489-x [published Online First: 08/13]
  40. Anstey Watkins JOT, Goudge J, Gómez-Olivé FX, et al. Mobile phone use among patients and health workers to enhance primary healthcare: A qualitative study in rural South Africa. *Social Science & Medicine* 2018;198:139-47. doi: <https://doi.org/10.1016/j.socscimed.2018.01.011>

**Table 1: The interview guide topic areas and key questions**

| Topic area   | Key questions used in interviews                                                                                                                                                                                                                                                                                                                                                                                                                                               |
|--------------|--------------------------------------------------------------------------------------------------------------------------------------------------------------------------------------------------------------------------------------------------------------------------------------------------------------------------------------------------------------------------------------------------------------------------------------------------------------------------------|
| Diabetes     | <ul style="list-style-type: none"> <li>• How would you describe your experience so far with diabetes?</li> <li>• How have you been coping with diabetes so far? Describe some of the ways you have been coping</li> <li>• Who and how much support do you have to cope with your conditions now</li> <li>• What are some of the most important treatment needs for a patient with diabetes</li> </ul>                                                                          |
| Telemedicine | <ul style="list-style-type: none"> <li>• Describe and tell us your experience with using the web-enabled glucometer so far.</li> <li>• How do you think the system was able to affect your diabetes management?</li> <li>• How do you think other will accept this system?</li> <li>• What would you think are some areas where the system was good and where are the areas we can improve?</li> <li>• What do you think about using this system for the long term?</li> </ul> |

1  
2  
3  
4  
5  
6  
7  
8  
9  
10  
11  
12  
13  
14  
15  
16  
17  
18  
19  
20  
21  
22  
23  
24  
25  
26  
27  
28  
29  
30  
31  
32  
33  
34  
35  
36  
37  
38  
39  
40  
41  
42  
43  
44  
45  
46  
47  
48  
49  
50  
51  
52  
53  
54  
55  
56  
57  
58  
59  
60

|  |                                                                                                                                                                                                              |
|--|--------------------------------------------------------------------------------------------------------------------------------------------------------------------------------------------------------------|
|  | <ul style="list-style-type: none"><li>• What would be some of your concerns (if any) if this was to be used?</li><li>• How was your interaction with your healthcare professional with the device?</li></ul> |
|--|--------------------------------------------------------------------------------------------------------------------------------------------------------------------------------------------------------------|

For peer review only

**Table 2: Baseline demographics of participants who participated in the focus group**

| Patients (n= 48)                             | Men (n = 21) | Women (n = 27) |
|----------------------------------------------|--------------|----------------|
| Age (years)                                  | 54.19        | 50.15          |
| Range                                        | 29-62        | 31-69          |
| Duration of diabetes (years)                 | 4.06         | 6.88           |
| Range                                        | 0.83-24      | 0.5-15         |
| No. of oral hypoglycaemic agents used, n (%) |              |                |
| 1-2                                          | 18 (85)      | 27 (100)       |
| ≥3                                           | 1 (4)        | 0 (0)          |
| No. of antihypertension drugs used, n (%)    |              |                |
| 1-2                                          | 9 (42)       | 11 (40)        |
| ≥3                                           | 3 (14)       | 7 (25)         |
| Insulin use, n (%)                           |              |                |
| Yes                                          | 4 (19)       | 2 (7)          |
| No                                           | 17 (81)      | 25 (93)        |

Data are expressed as mean, unless otherwise stated.

**Box 1: IDEAS study**

The Intervention for Diabetes with Education, Advancement and Support (IDEAS) study is a cluster randomized controlled study to evaluate the use of telemedicine to improve diabetes care. Participants in the telemedicine group were instructed to measure their blood glucose at least twice weekly (one fasting and one non-fasting) or more frequent as recommended by physician. These blood glucose readings will be transmitted via a Bluetooth technology to the participants' mobile phone to a remote secure server. Participants and their physicians were able to access the records on the server. Advice on lifestyle modification, any potential changes in medication, who and how to contact their healthcare providers were also given monthly during the study. A researcher also checked participants' results weekly and initiate intervention if needed (e.g. medication changes, counselling) with the consent of the attending physician.

## Standards for Reporting Qualitative Research (SRQR)\*

<http://www.equator-network.org/reporting-guidelines/srqr/>

Page/line no(s).

### Title and abstract

|                                                                                                                                                                                                                                                              |     |
|--------------------------------------------------------------------------------------------------------------------------------------------------------------------------------------------------------------------------------------------------------------|-----|
| <p><b>Title</b> - Concise description of the nature and topic of the study Identifying the study as qualitative or indicating the approach (e.g., ethnography, grounded theory) or data collection methods (e.g., interview, focus group) is recommended</p> | 1   |
| <p><b>Abstract</b> - Summary of key elements of the study using the abstract format of the intended publication; typically includes background, purpose, methods, results, and conclusions</p>                                                               | 3-4 |

### Introduction

|                                                                                                                                                                     |     |
|---------------------------------------------------------------------------------------------------------------------------------------------------------------------|-----|
| <p><b>Problem formulation</b> - Description and significance of the problem/phenomenon studied; review of relevant theory and empirical work; problem statement</p> | 6-7 |
| <p><b>Purpose or research question</b> - Purpose of the study and specific objectives or questions</p>                                                              | 8   |

### Methods

|                                                                                                                                                                                                                                                                                                                                                                                                             |      |
|-------------------------------------------------------------------------------------------------------------------------------------------------------------------------------------------------------------------------------------------------------------------------------------------------------------------------------------------------------------------------------------------------------------|------|
| <p><b>Qualitative approach and research paradigm</b> - Qualitative approach (e.g., ethnography, grounded theory, case study, phenomenology, narrative research) and guiding theory if appropriate; identifying the research paradigm (e.g., postpositivist, constructivist/ interpretivist) is also recommended; rationale**</p>                                                                            | 10   |
| <p><b>Researcher characteristics and reflexivity</b> - Researchers' characteristics that may influence the research, including personal attributes, qualifications/experience, relationship with participants, assumptions, and/or presuppositions; potential or actual interaction between researchers' characteristics and the research questions, approach, methods, results, and/or transferability</p> | 10   |
| <p><b>Context</b> - Setting/site and salient contextual factors; rationale**</p>                                                                                                                                                                                                                                                                                                                            | 9    |
| <p><b>Sampling strategy</b> - How and why research participants, documents, or events were selected; criteria for deciding when no further sampling was necessary (e.g., sampling saturation); rationale**</p>                                                                                                                                                                                              | 9    |
| <p><b>Ethical issues pertaining to human subjects</b> - Documentation of approval by an appropriate ethics review board and participant consent, or explanation for lack thereof; other confidentiality and data security issues</p>                                                                                                                                                                        | 11   |
| <p><b>Data collection methods</b> - Types of data collected; details of data collection procedures including (as appropriate) start and stop dates of data collection and analysis, iterative process, triangulation of sources/methods, and modification of procedures in response to evolving study findings; rationale**</p>                                                                             | 9-10 |

|                       |                                                                                                                                                                                                                                                       |                 |
|-----------------------|-------------------------------------------------------------------------------------------------------------------------------------------------------------------------------------------------------------------------------------------------------|-----------------|
| 1<br>2<br>3<br>4<br>5 | <b>Data collection instruments and technologies</b> - Description of instruments (e.g., interview guides, questionnaires) and devices (e.g., audio recorders) used for data collection; if/how the instrument(s) changed over the course of the study | 10-11 & Table 1 |
| 6<br>7<br>8           | <b>Units of study</b> - Number and relevant characteristics of participants, documents, or events included in the study; level of participation (could be reported in results)                                                                        | 12              |
| 9<br>10<br>11<br>12   | <b>Data processing</b> - Methods for processing data prior to and during analysis, including transcription, data entry, data management and security, verification of data integrity, data coding, and anonymization/de-identification of excerpts    | 10              |
| 13<br>14<br>15<br>16  | <b>Data analysis</b> - Process by which inferences, themes, etc., were identified and developed, including the researchers involved in data analysis; usually references a specific paradigm or approach; rationale**                                 | 11              |
| 17<br>18<br>19<br>20  | <b>Techniques to enhance trustworthiness</b> - Techniques to enhance trustworthiness and credibility of data analysis (e.g., member checking, audit trail, triangulation); rationale**                                                                | 11              |

### Results/findings

|                      |                                                                                                                                                                                                   |       |
|----------------------|---------------------------------------------------------------------------------------------------------------------------------------------------------------------------------------------------|-------|
| 23<br>24<br>25<br>26 | <b>Synthesis and interpretation</b> - Main findings (e.g., interpretations, inferences, and themes); might include development of a theory or model, or integration with prior research or theory | 13-19 |
| 27<br>28<br>29       | <b>Links to empirical data</b> - Evidence (e.g., quotes, field notes, text excerpts, photographs) to substantiate analytic findings                                                               | 13-19 |

### Discussion

|                                  |                                                                                                                                                                                                                                                                                                                                                                                                             |       |
|----------------------------------|-------------------------------------------------------------------------------------------------------------------------------------------------------------------------------------------------------------------------------------------------------------------------------------------------------------------------------------------------------------------------------------------------------------|-------|
| 32<br>33<br>34<br>35<br>36<br>37 | <b>Integration with prior work, implications, transferability, and contribution(s) to the field</b> - Short summary of main findings; explanation of how findings and conclusions connect to, support, elaborate on, or challenge conclusions of earlier scholarship; discussion of scope of application/generalizability; identification of unique contribution(s) to scholarship in a discipline or field | 20-22 |
| 38<br>39                         | <b>Limitations</b> - Trustworthiness and limitations of findings                                                                                                                                                                                                                                                                                                                                            | 22    |

### Other

|                |                                                                                                                                               |    |
|----------------|-----------------------------------------------------------------------------------------------------------------------------------------------|----|
| 42<br>43<br>44 | <b>Conflicts of interest</b> - Potential sources of influence or perceived influence on study conduct and conclusions; how these were managed | 25 |
| 45<br>46       | <b>Funding</b> - Sources of funding and other support; role of funders in data collection, interpretation, and reporting                      | 25 |

\*The authors created the SRQR by searching the literature to identify guidelines, reporting standards, and critical appraisal criteria for qualitative research; reviewing the reference lists of retrieved sources; and contacting experts to gain feedback. The SRQR aims to improve the transparency of all aspects of qualitative research by providing clear standards for reporting qualitative research.

1  
2  
3  
4  
5  
6  
7  
8  
9  
10  
11  
12  
13  
14  
15  
16  
17  
18  
19  
20  
21  
22  
23  
24  
25  
26  
27  
28  
29  
30  
31  
32  
33  
34  
35  
36  
37  
38  
39  
40  
41  
42  
43  
44  
45  
46  
47  
48  
49  
50  
51  
52  
53  
54  
55  
56  
57  
58  
59  
60

\*\*The rationale should briefly discuss the justification for choosing that theory, approach, method, or technique rather than other options available, the assumptions and limitations implicit in those choices, and how those choices influence study conclusions and transferability. As appropriate, the rationale for several items might be discussed together.

**Reference:**

O'Brien BC, Harris IB, Beckman TJ, Reed DA, Cook DA. **Standards for reporting qualitative research: a synthesis of recommendations.** *Academic Medicine*, Vol. 89, No. 9 / Sept 2014  
DOI: 10.1097/ACM.0000000000000388

For peer review only
